# Supplementary material for: Coumarin-acetohydrazide derivatives as novel antiproliferative agents via VEGFR-2/AKT axis inhibition and apoptosis triggering
Source: Royal Society of Chemistry journal article supplement (doi:10.1039/d2nj02436e), 2022-01-01
Supplement: d2nj02436e1.pdf [file d2nj02436e1.pdf]

## Supplementary Data

(New Journal of Chemistry)

### Coumarin-Aceto-hydrazone Derivatives as Novel Antiproliferative Agents via VEGFR-2/AKT Axis Inhibition and Apoptosis Triggering

Lina M.A. Abdel Ghany,<sup>a</sup> Nehad M. El-Dydamony,<sup>a</sup> Amira A. Helwa,<sup>\*b</sup> Sahar M. Abdelraouf,<sup>c</sup> Rana M. Abdelnaby<sup>d</sup>

#### (<sup>1</sup>H-NMR)

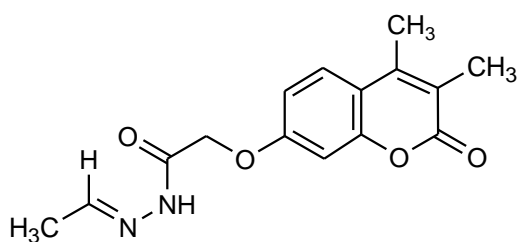

4a

#### 2-((3,4-dimethyl-2-oxo-2H-chromen-7-yl)oxy)-N'-ethylideneacetohydrazone

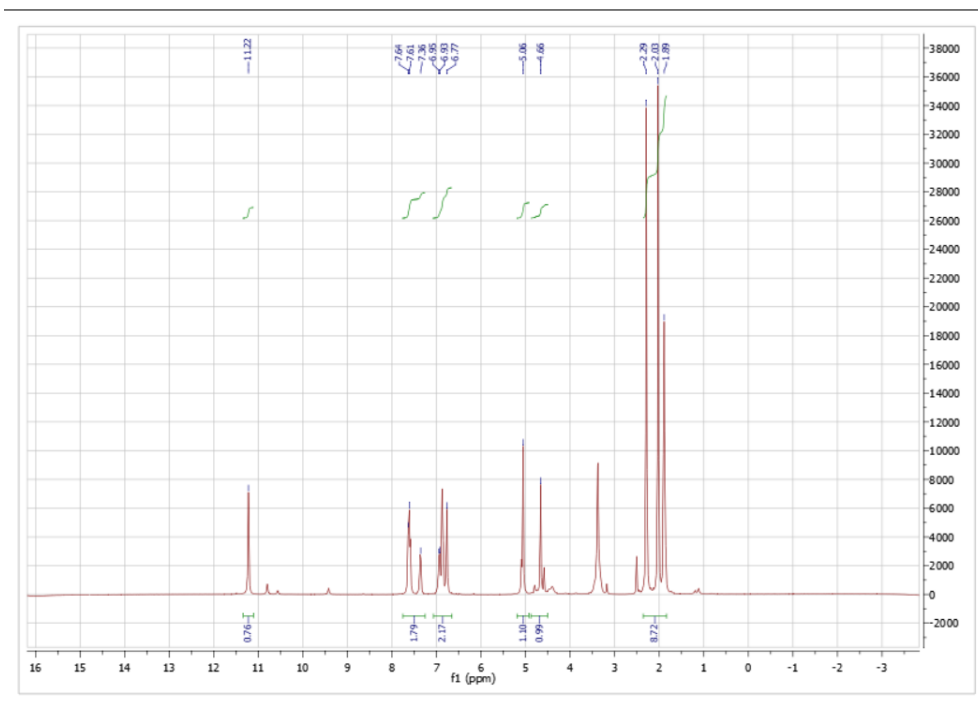

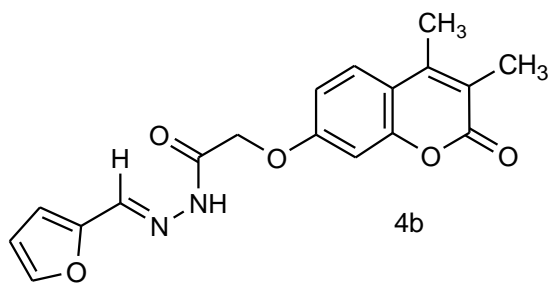

**2-((3,4-dimethyl-2-oxo-2H-chromen-7-yl)oxy)-N'-(furan-2-ylmethylene)acetohydrazide**

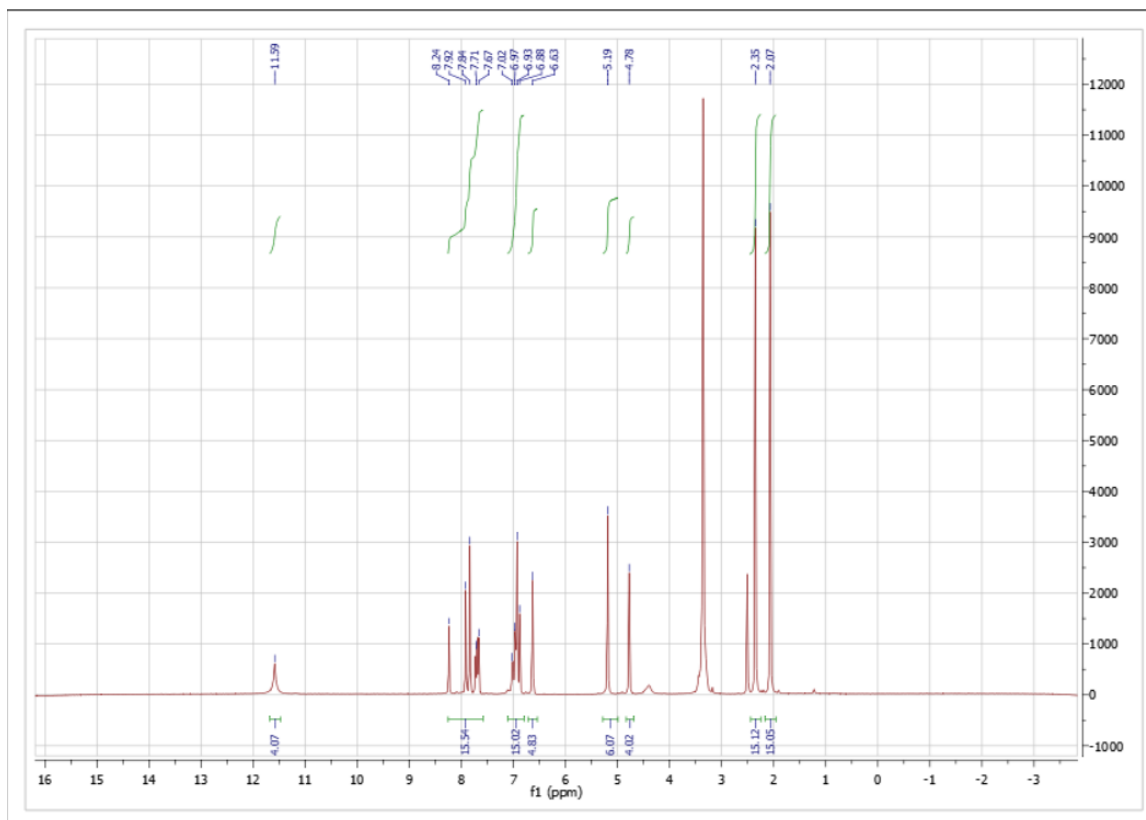

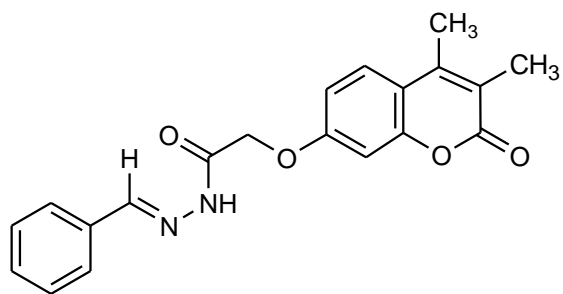

4c

**N'-benzylidene-2-((3,4-dimethyl-2-oxo-2H-chromen-7-yl)oxy)acetohydrazide**

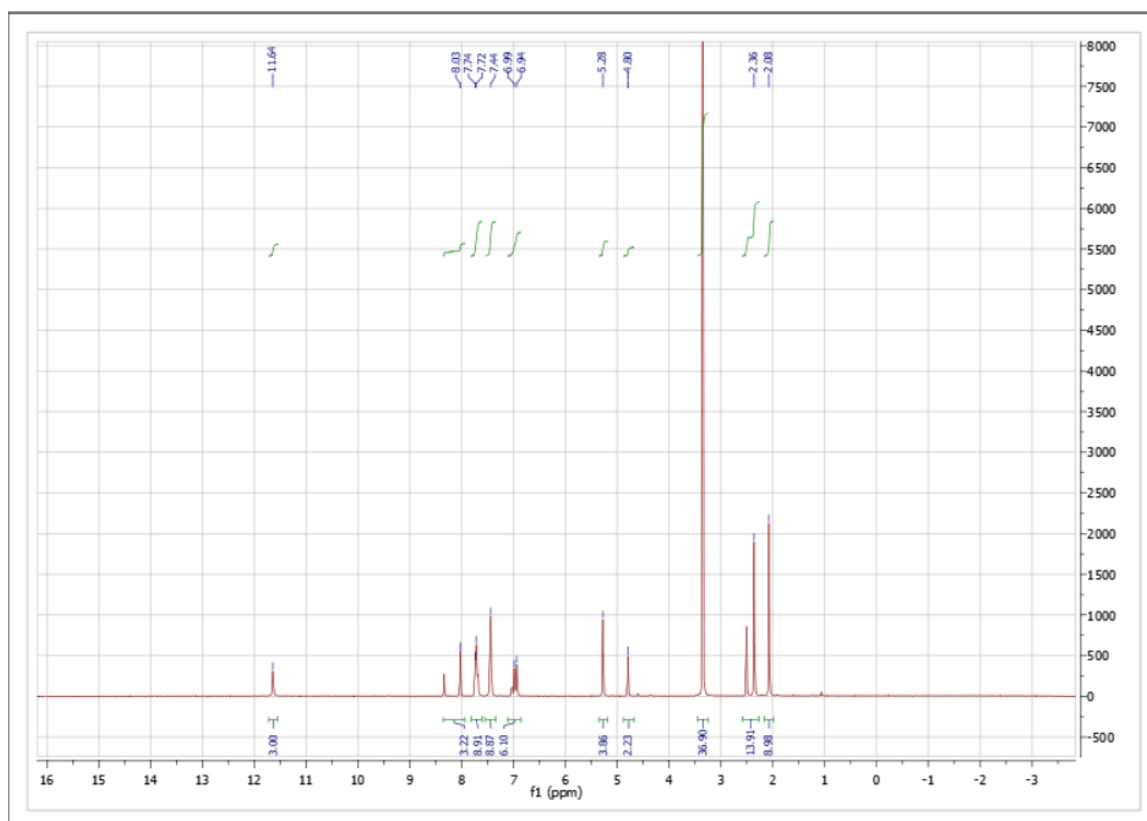

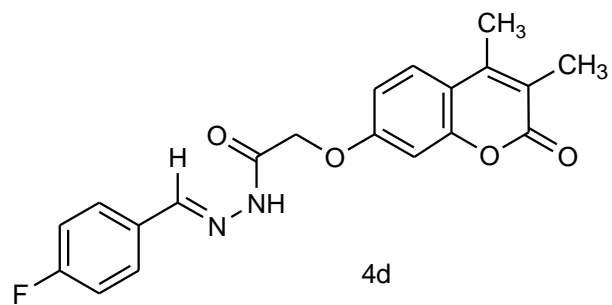

**2-((3,4-dimethyl-2-oxo-2H-chromen-7-yl)oxy)-N'-(4-fluorobenzylidene)acetohydrazide**

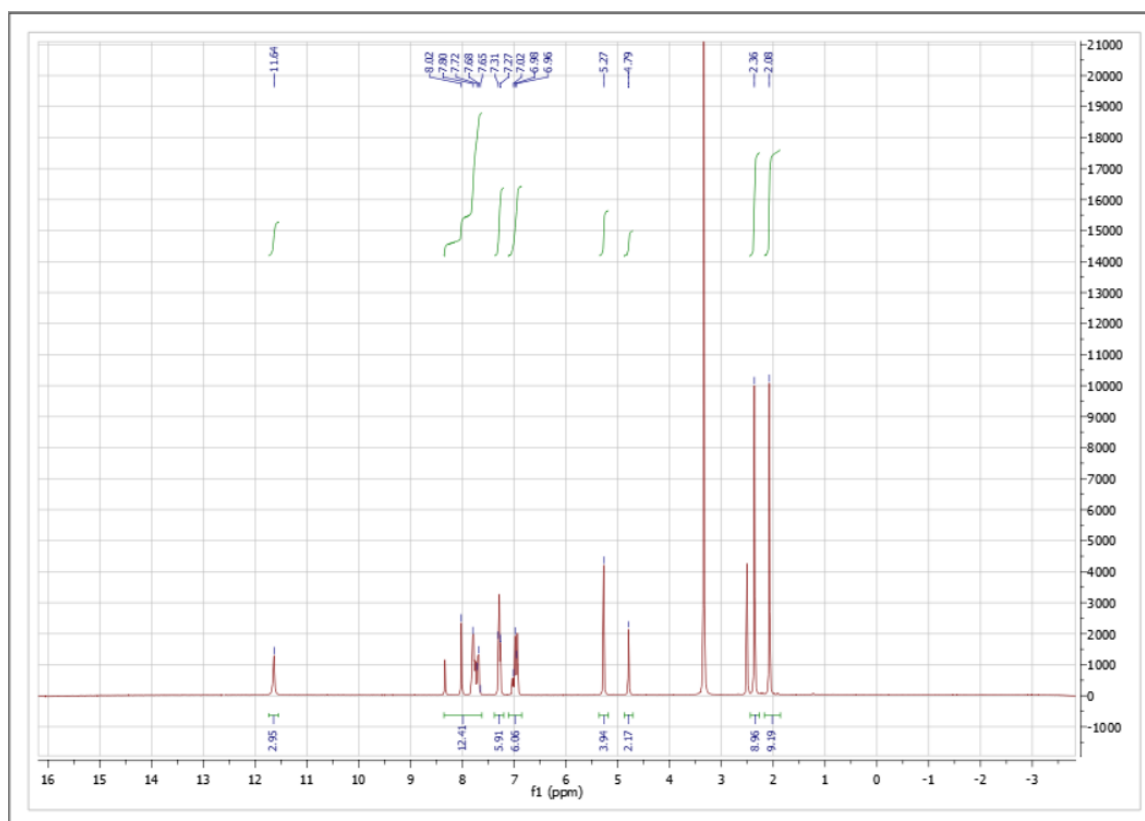

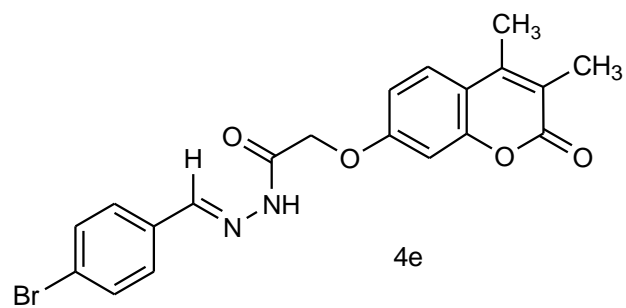

**N'-(4-bromobenzylidene)-2-((3,4-dimethyl-2-oxo-2*H*-chromen-7-yl)oxy)acetohydrazide**

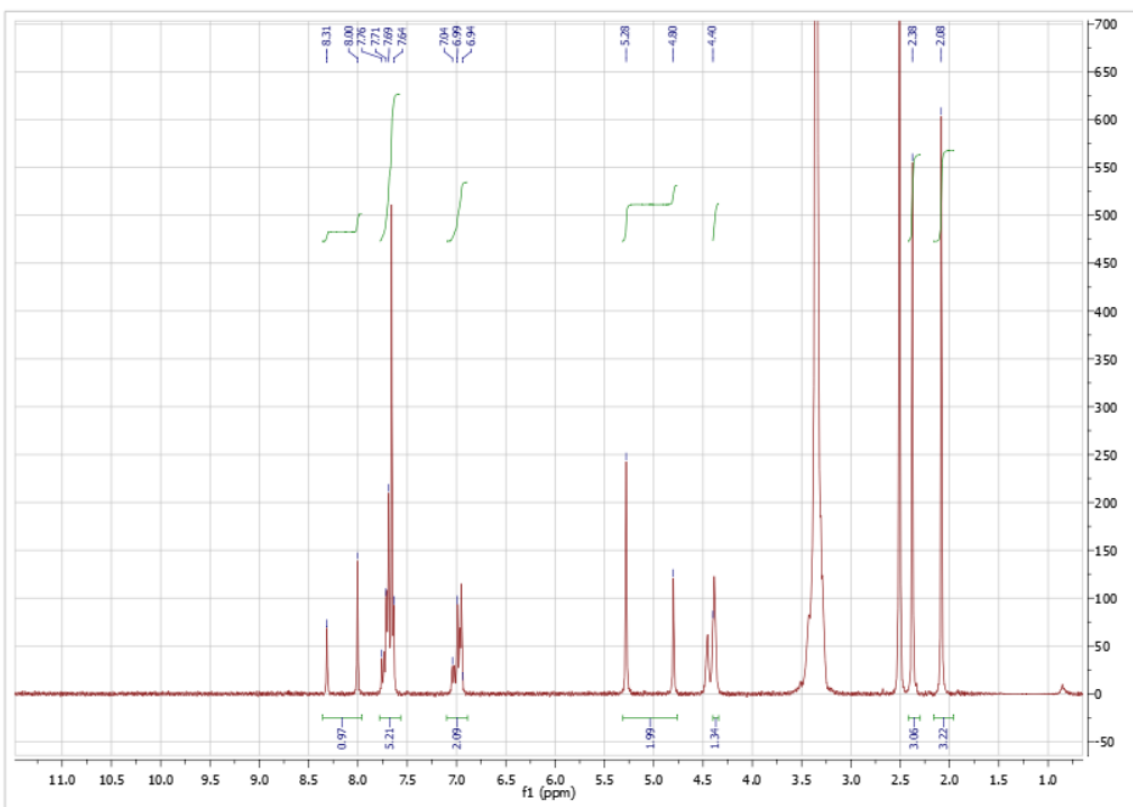

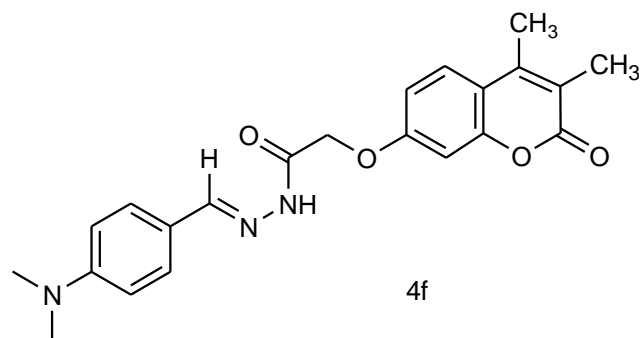

**2-((3,4-dimethyl-2-oxo-2H-chromen-7-yl)oxy)-N'-(4-(dimethylamino)benzylidene)acetohydrazide**

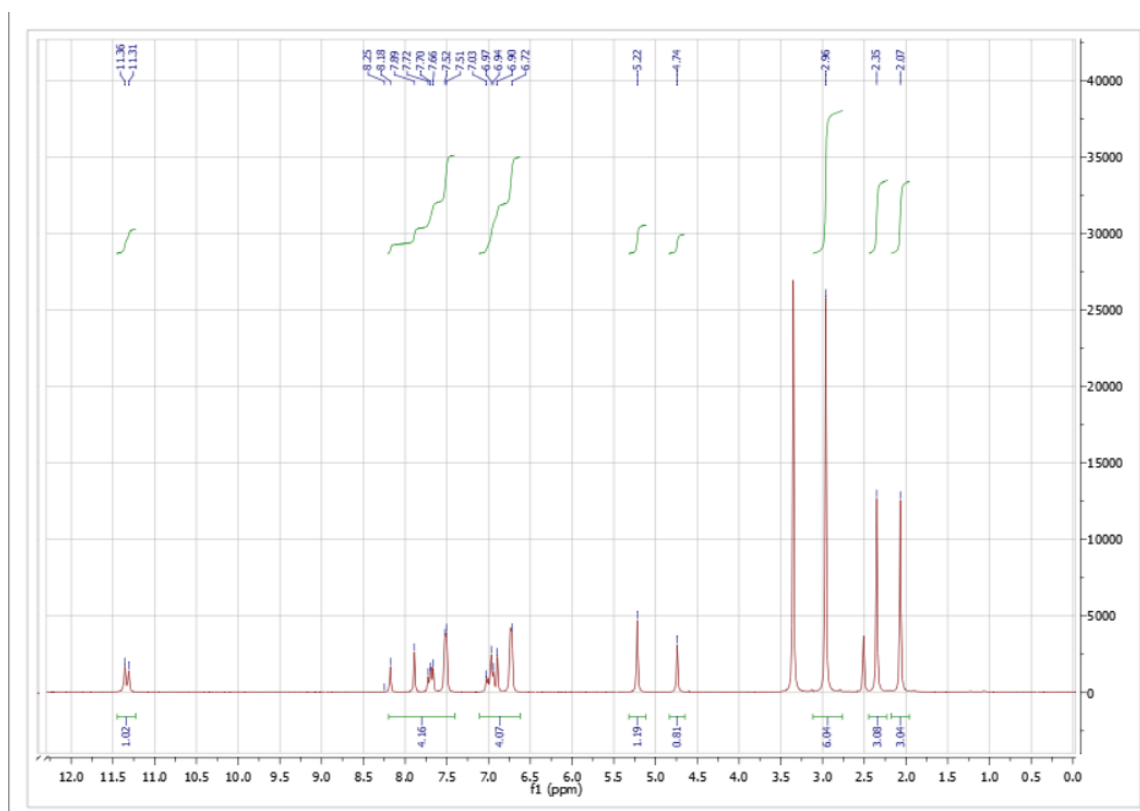

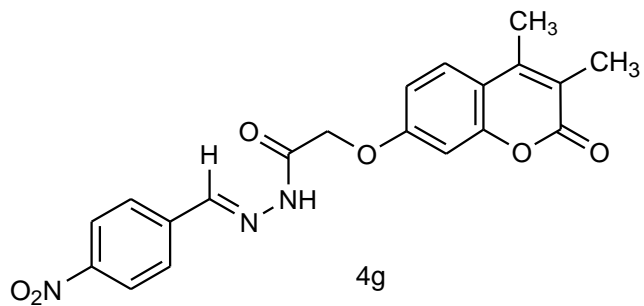

**2-((3,4-dimethyl-2-oxo-2H-chromen-7-yl)oxy)-N'-(4-nitrobenzylidene)acetohydrazide**

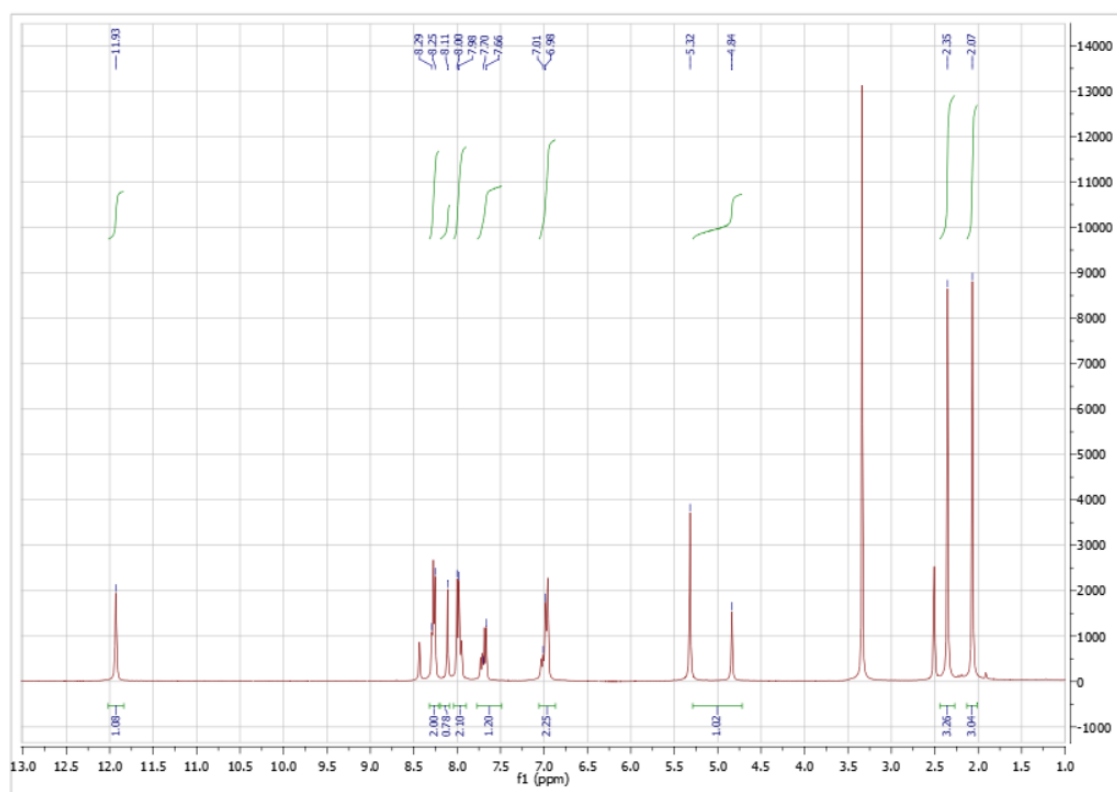

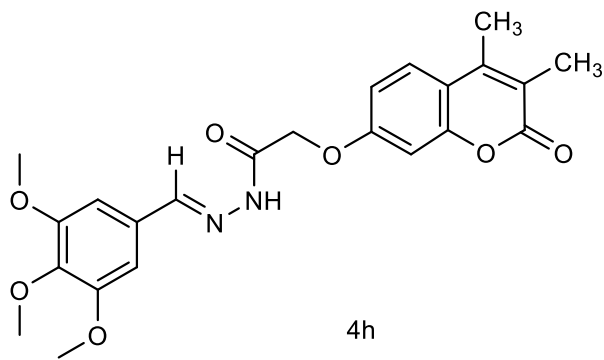

**2-((3,4-dimethyl-2-oxo-2H-chromen-7-yl)oxy)-N'-(3,4,5-trimethoxybenzylidene)acetohydrazi**

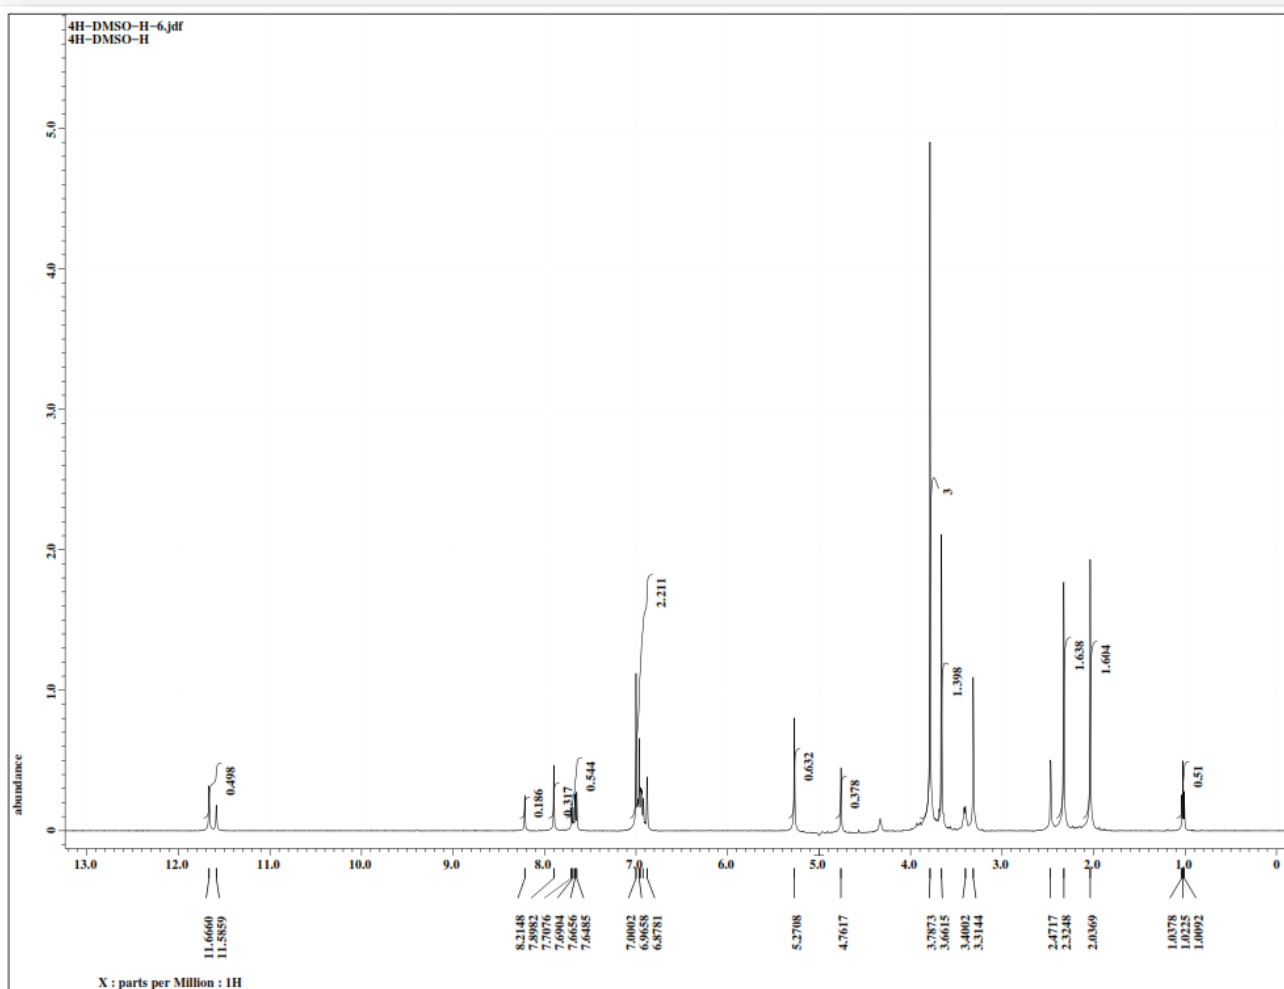



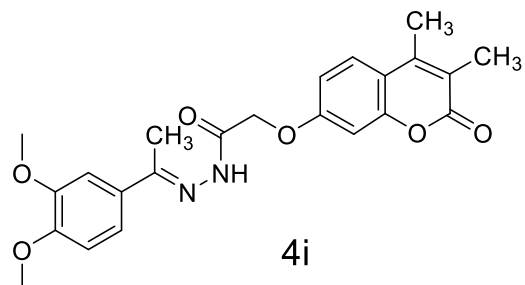

**N'-(1-(3,4-dimethoxyphenyl)ethylidene)-2-((3,4-dimethyl-2-oxo-2H-chromen-7-yl)oxy)acetohydrazide**

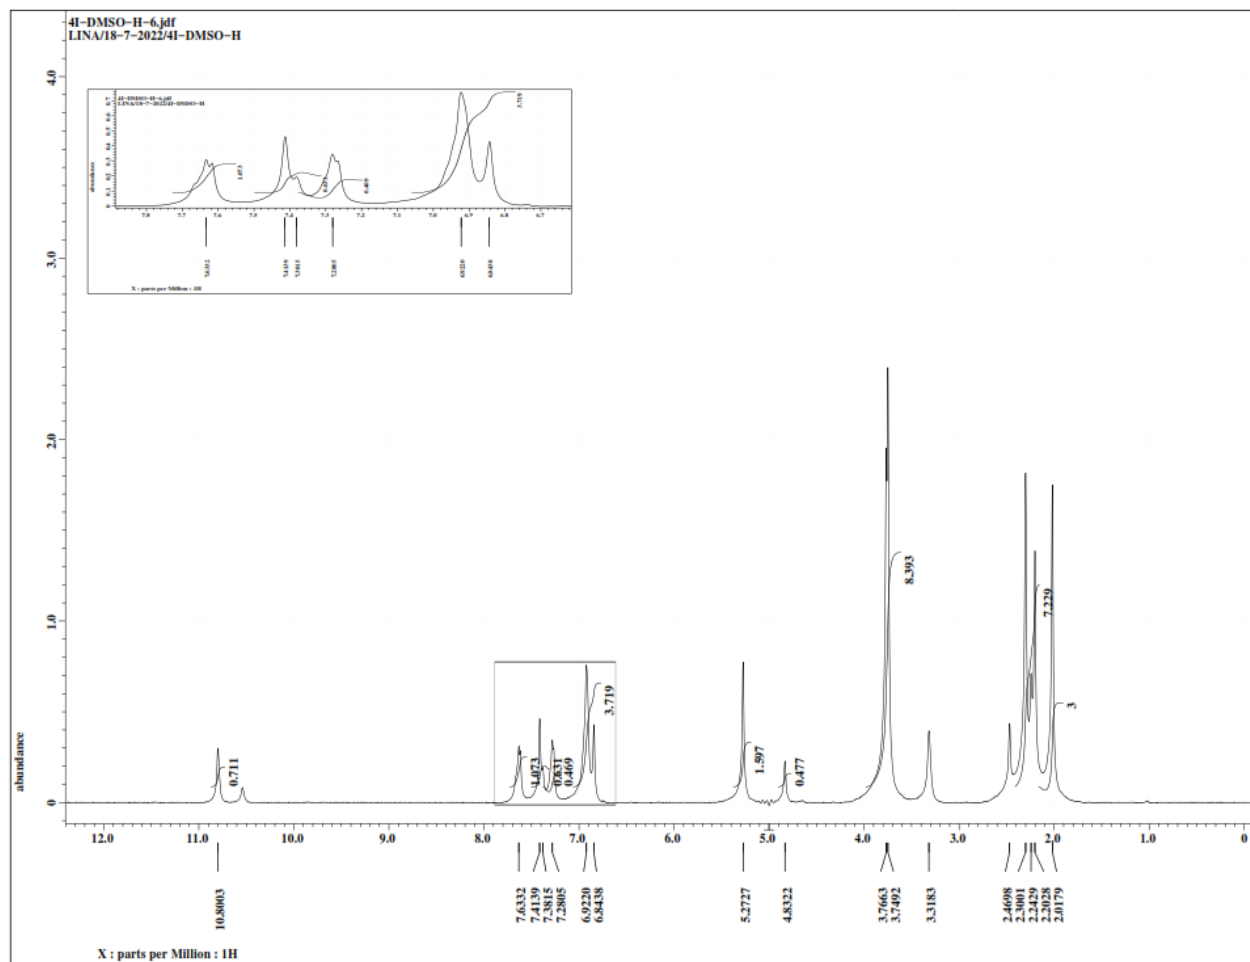

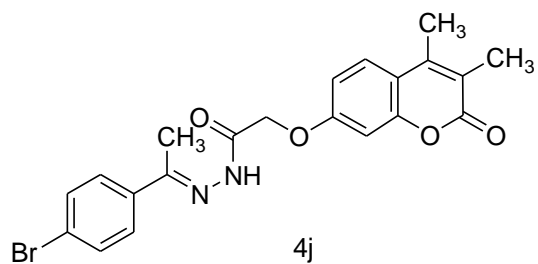

**N'-(1-(4-bromophenyl)ethylidene)-2-((3,4-dimethyl-2-oxo-2H-chromen-7-yl)oxy)acetohydrazide**

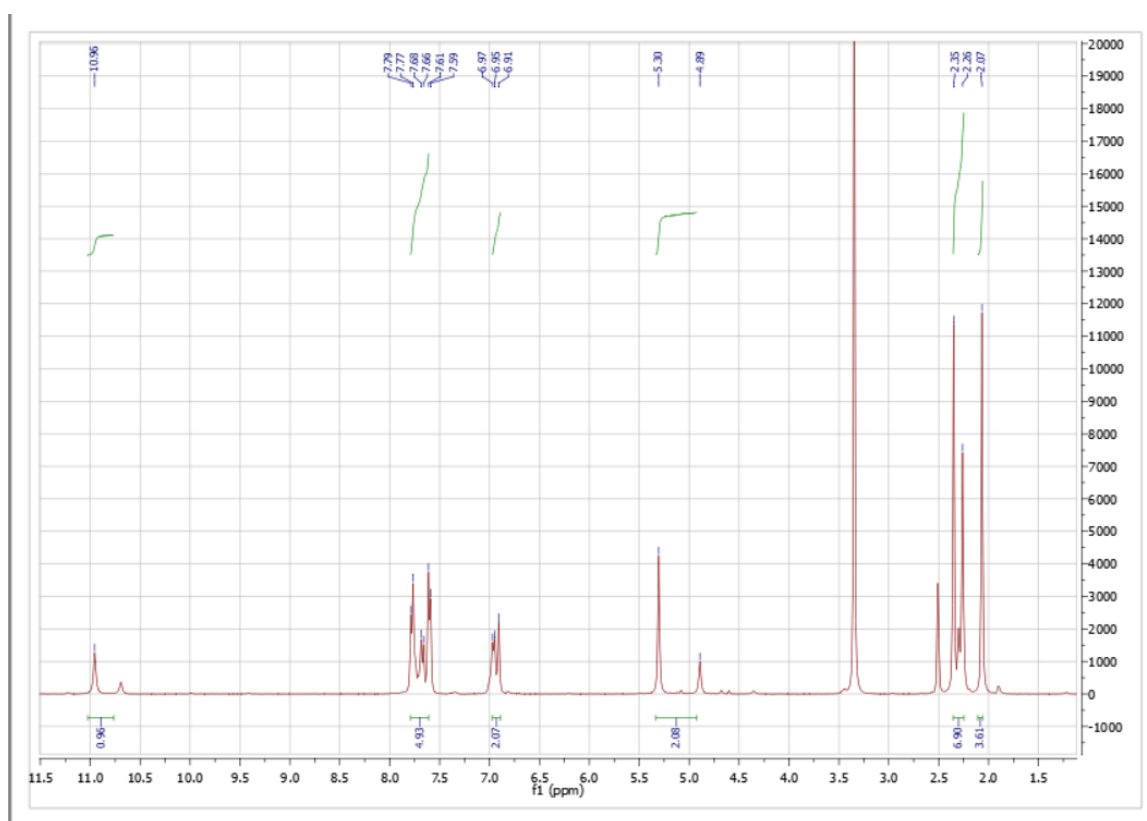

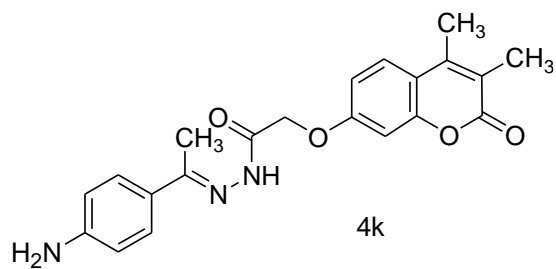

**N'-(1-(4-aminophenyl)ethylidene)-2-((3,4-dimethyl-2-oxo-2H-chromen-7-yl)oxy)acetohydrazide**

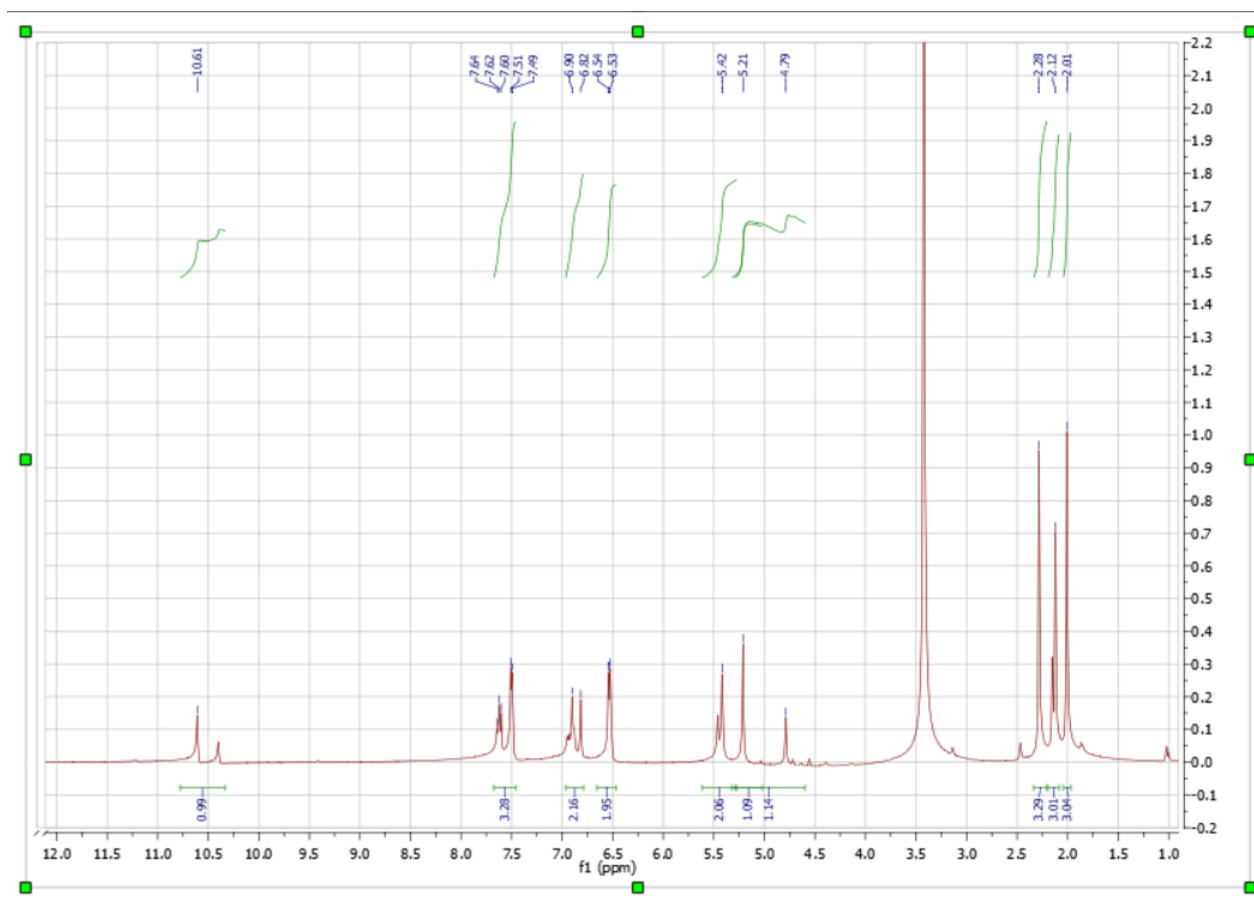

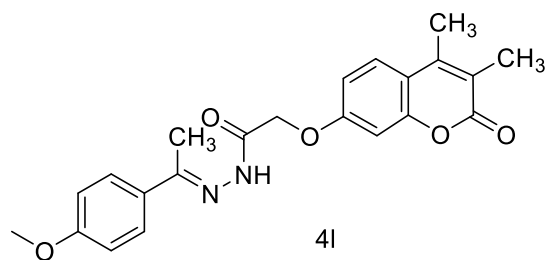

**2-((3,4-dimethyl-2-oxo-2H-chromen-7-yl)oxy)-N'-(1-(4-methoxyphenyl)ethylidene)acetohydrazide**

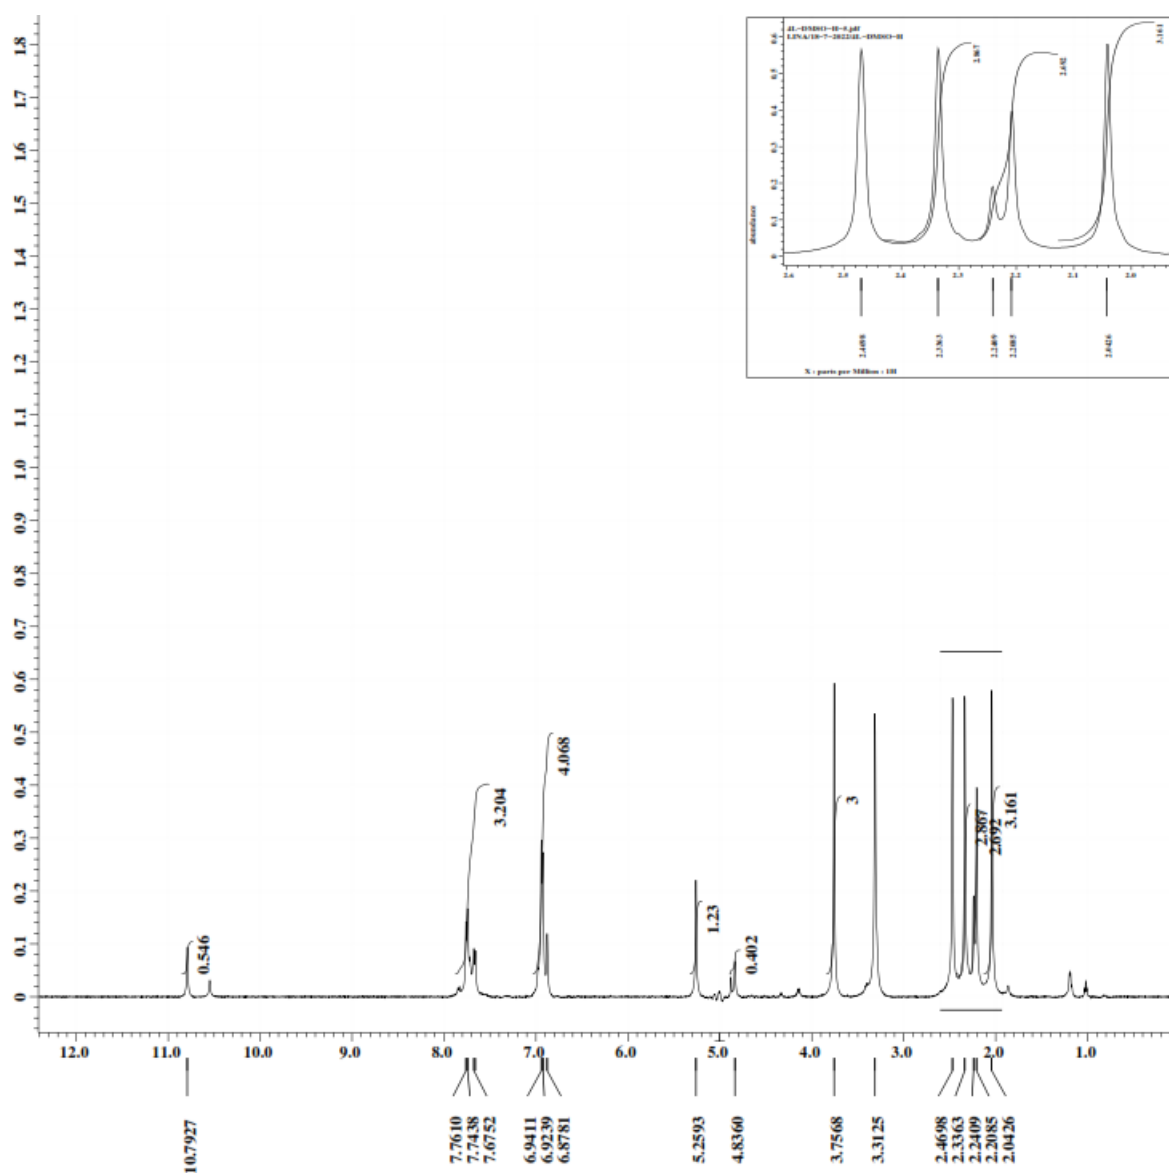

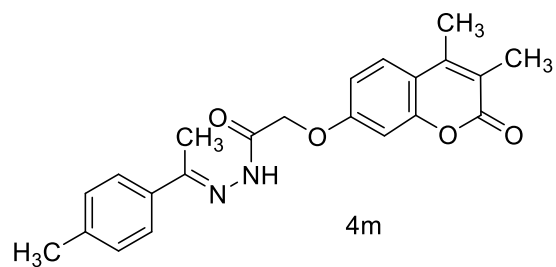

**2-((3,4-dimethyl-2-oxo-2H-chromen-7-yl)oxy)-N'-(1-(p-tolyl)ethylidene)acetohydrazide**

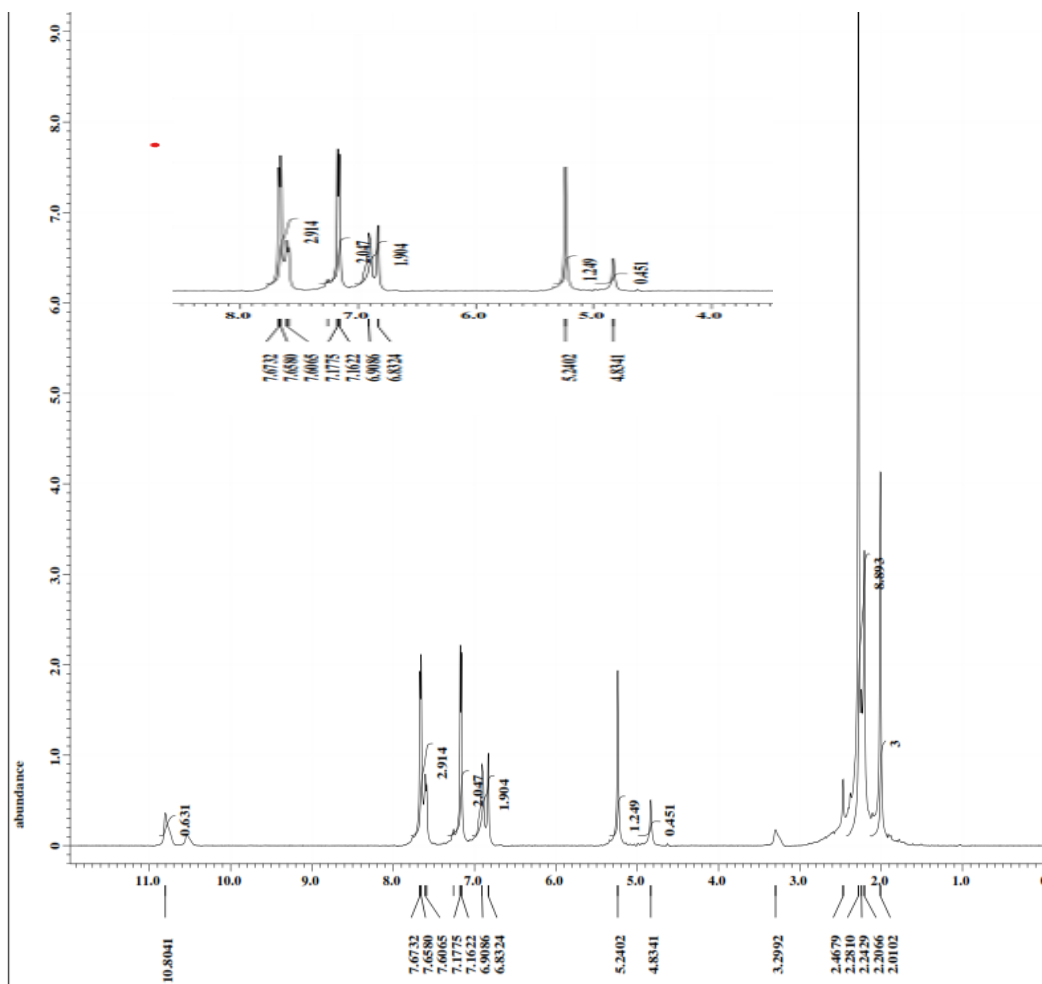

# <sup>13</sup>C-NMR

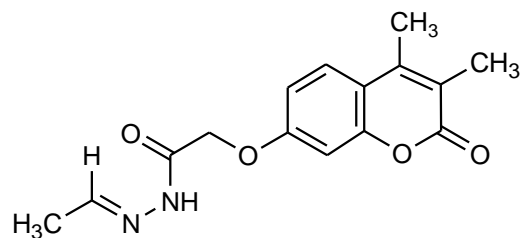

4a

2-((3,4-dimethyl-2-oxo-2H-chromen-7-yl)oxy)-N'-ethylideneacetohydrazide

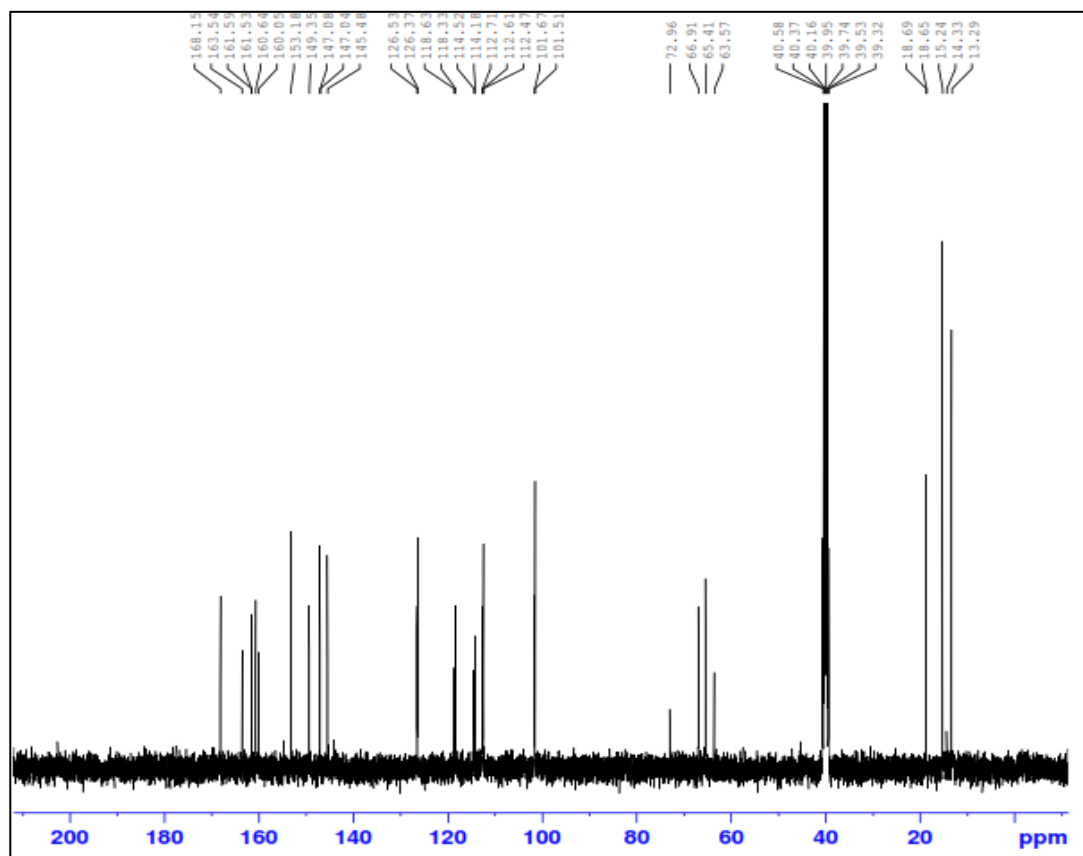

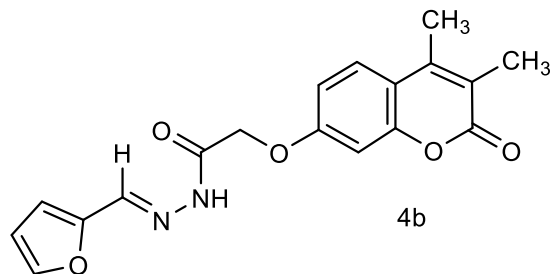

**2-((3,4-dimethyl-2-oxo-2H-chromen-7-yl)oxy)-N'-(furan-2-ylmethylene)acetohydrazide**

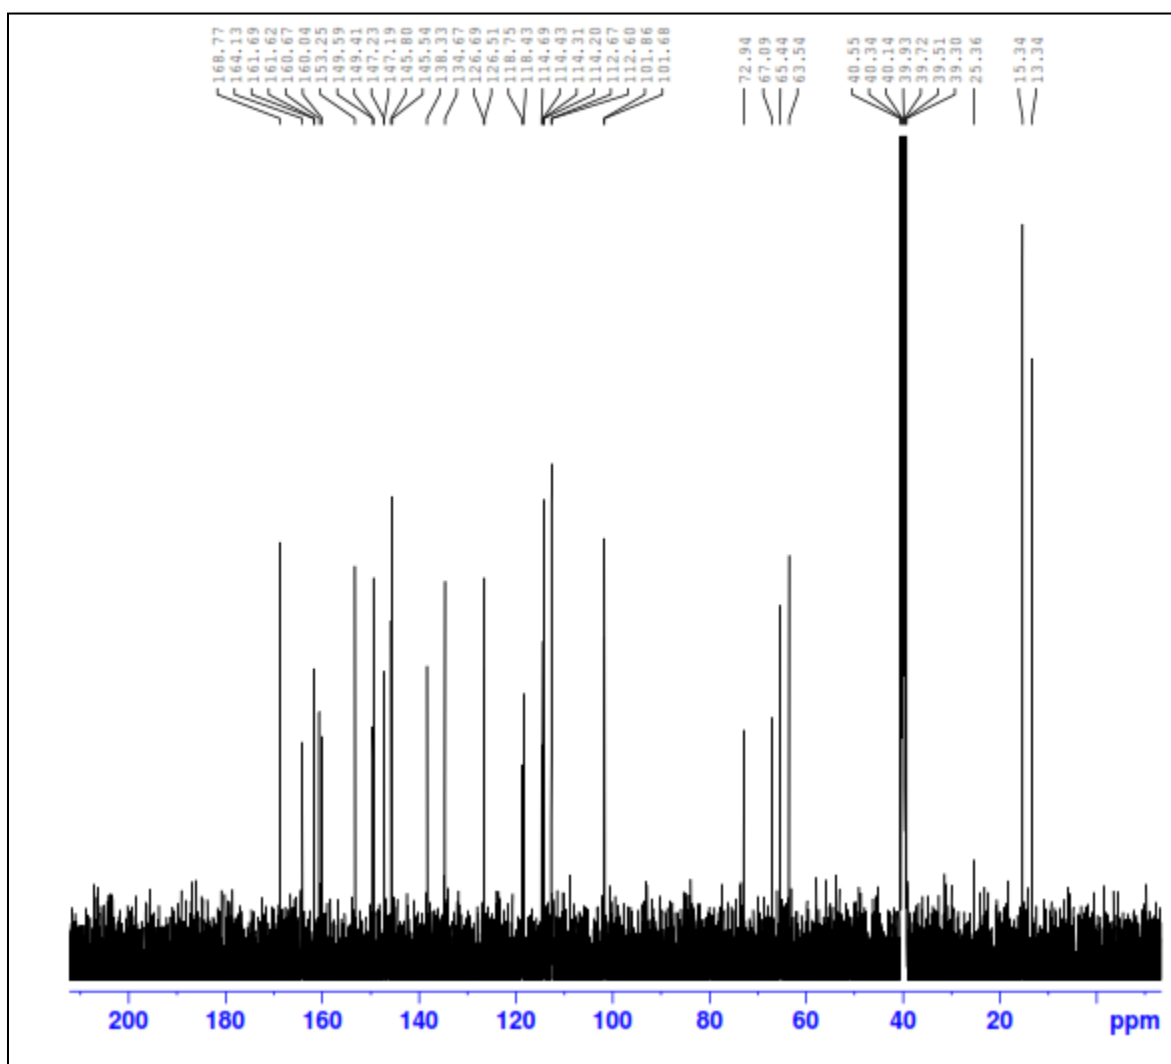

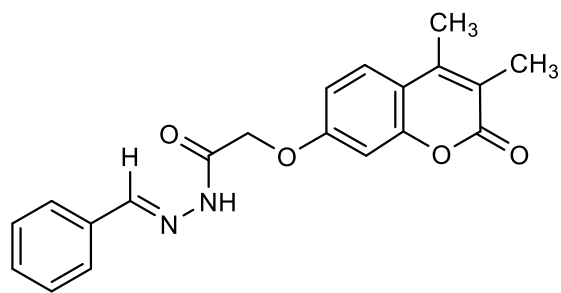

4c

**N'-benzylidene-2-((3,4-dimethyl-2-oxo-2H-chromen-7-yl)oxy)acetohydrazide**

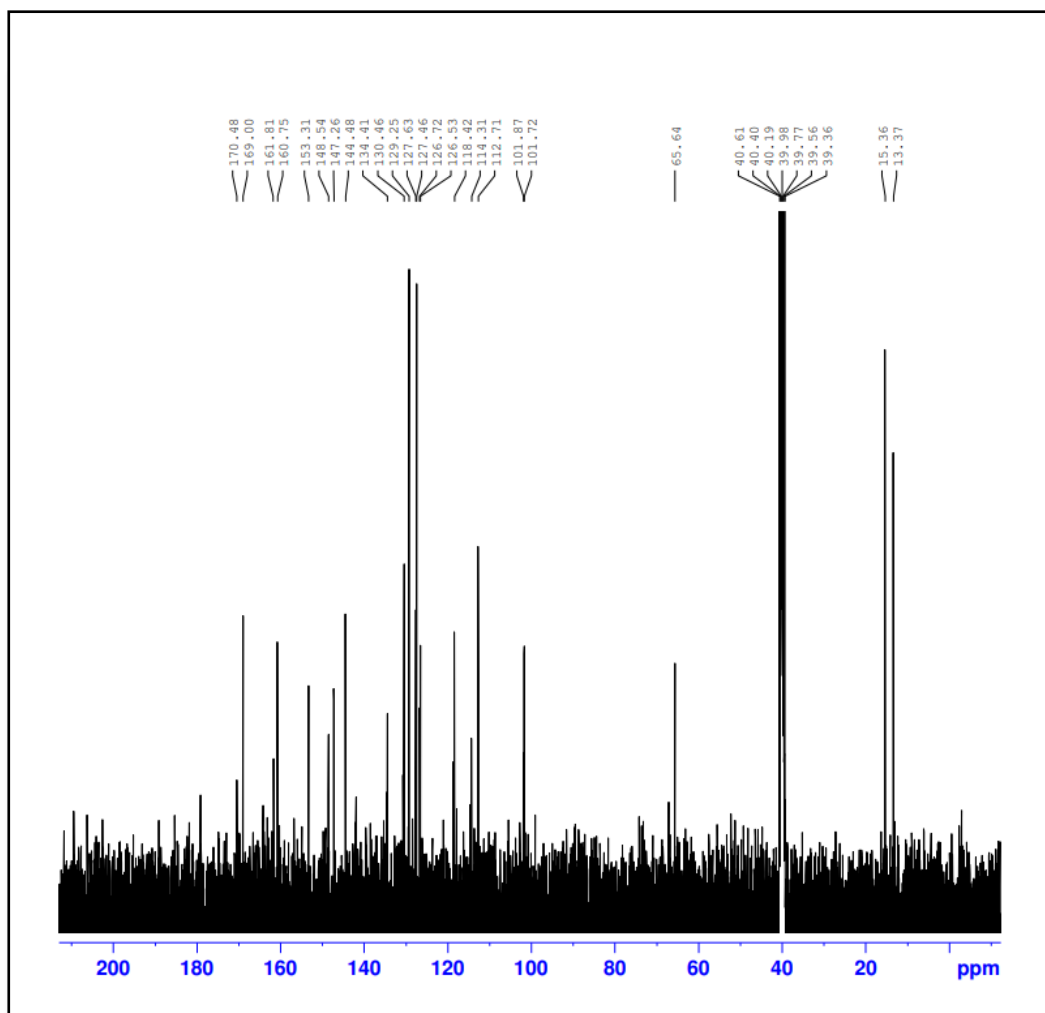



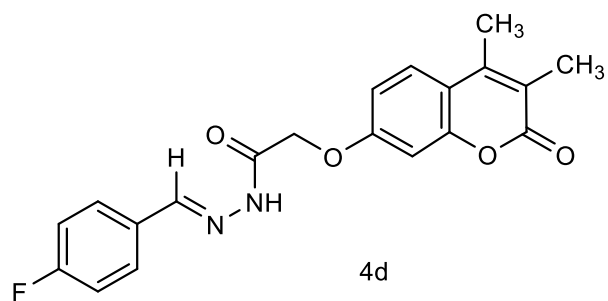

**2-((3,4-dimethyl-2-oxo-2H-chromen-7-yl)oxy)-N'-(4-fluorobenzylidene)acetohydrazide**

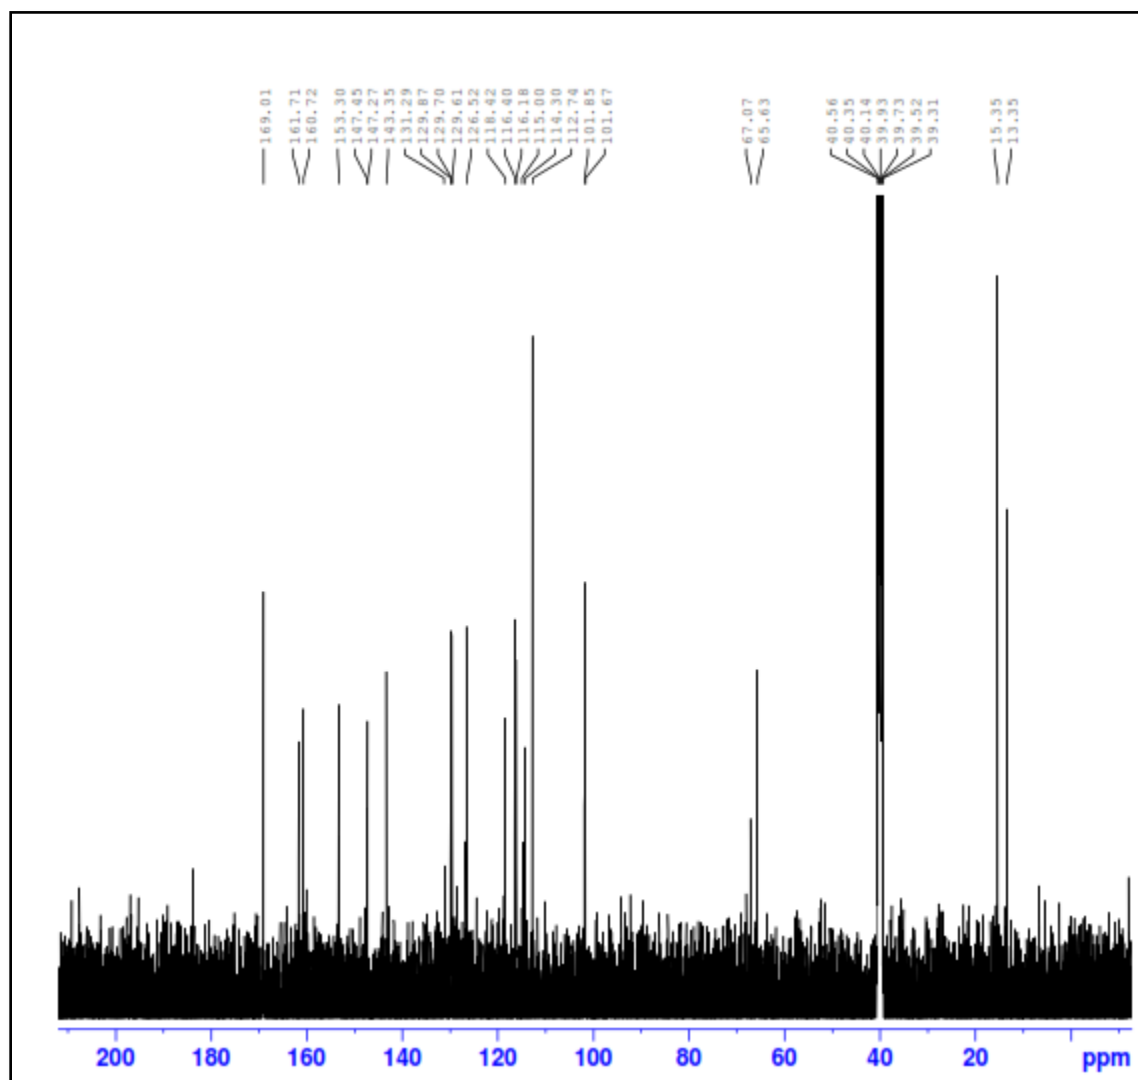

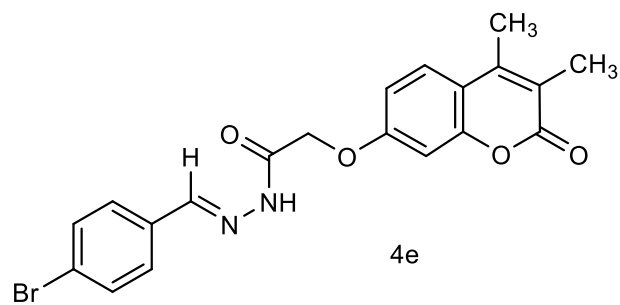

**N'-(4-bromobenzylidene)-2-((3,4-dimethyl-2-oxo-2H-chromen-7-yl)oxy)acetohydrazide**

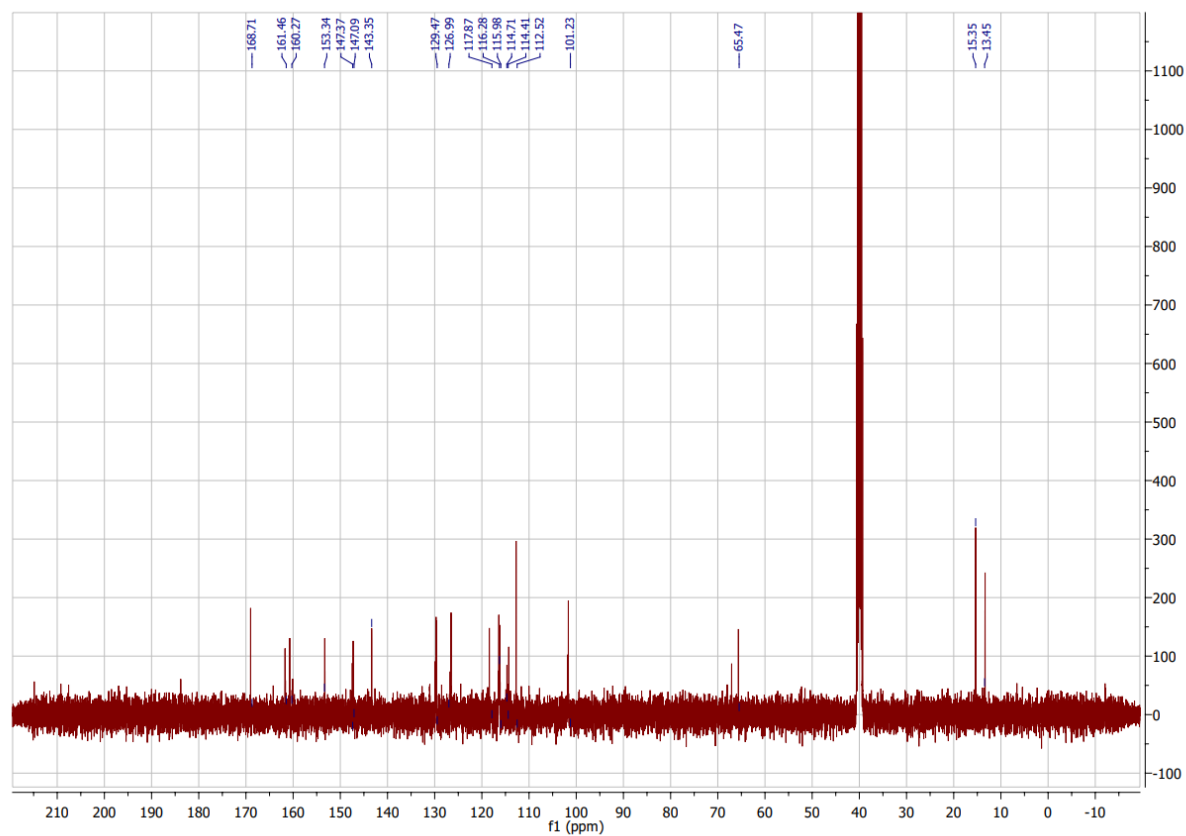

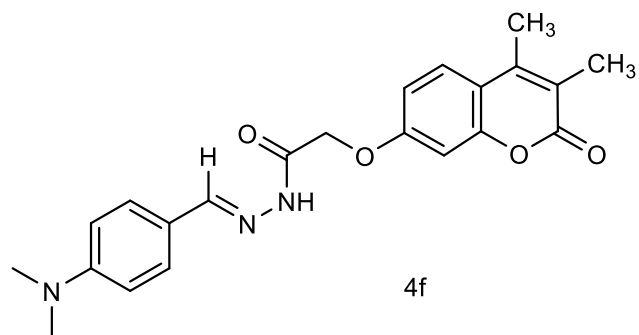

**2-((3,4-dimethyl-2-oxo-2H-chromen-7-yl)oxy)-N'-(4-(dimethylamino)benzylidene)acetohydrazide**

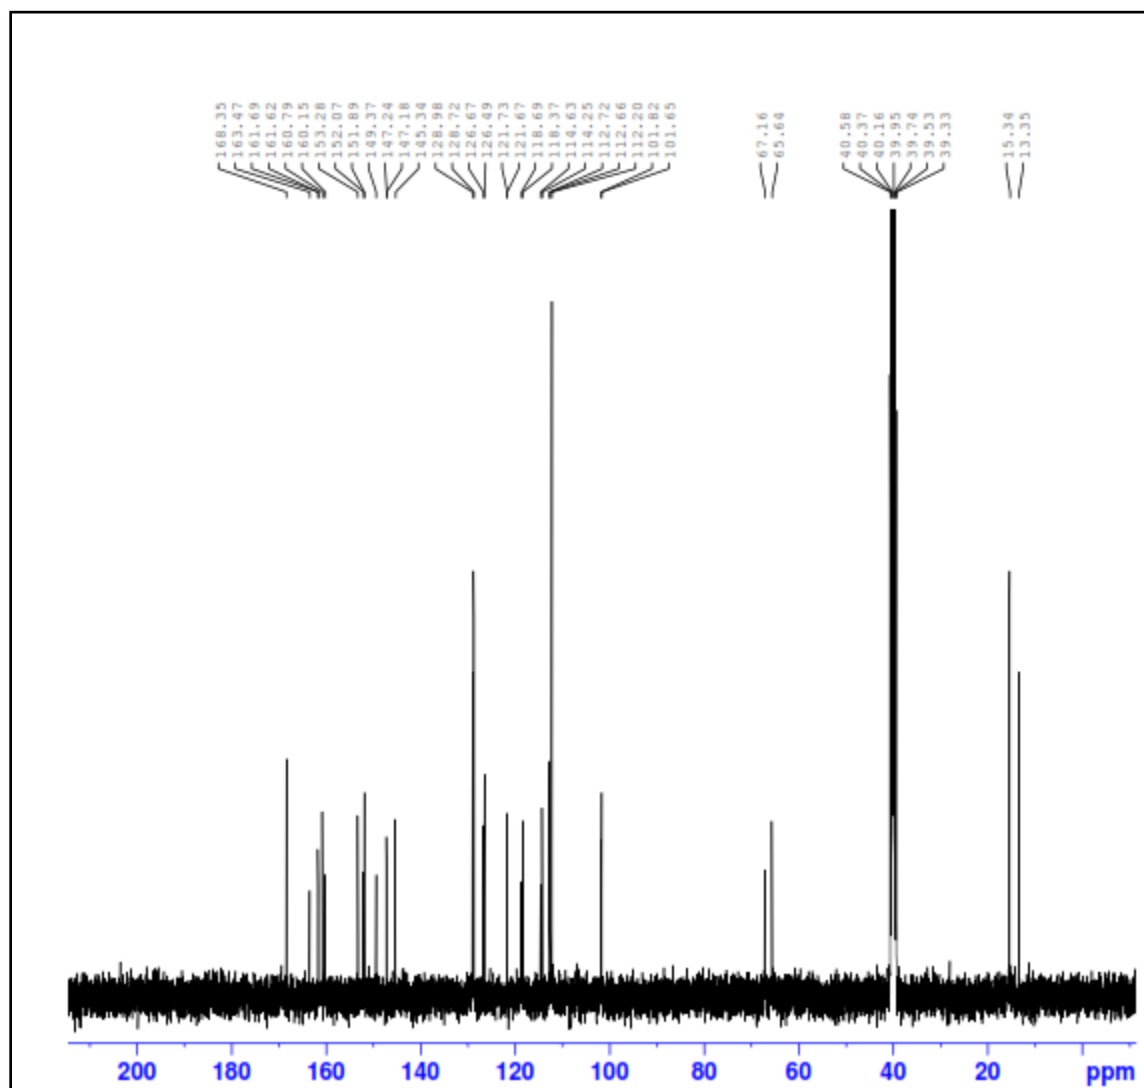

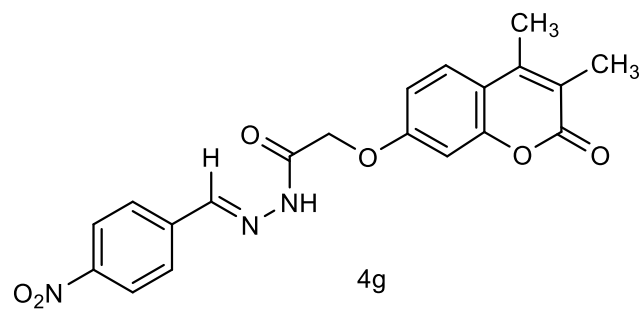

**2-((3,4-dimethyl-2-oxo-2H-chromen-7-yl)oxy)-N'-(4-nitrobenzylidene)acetohydrazide**

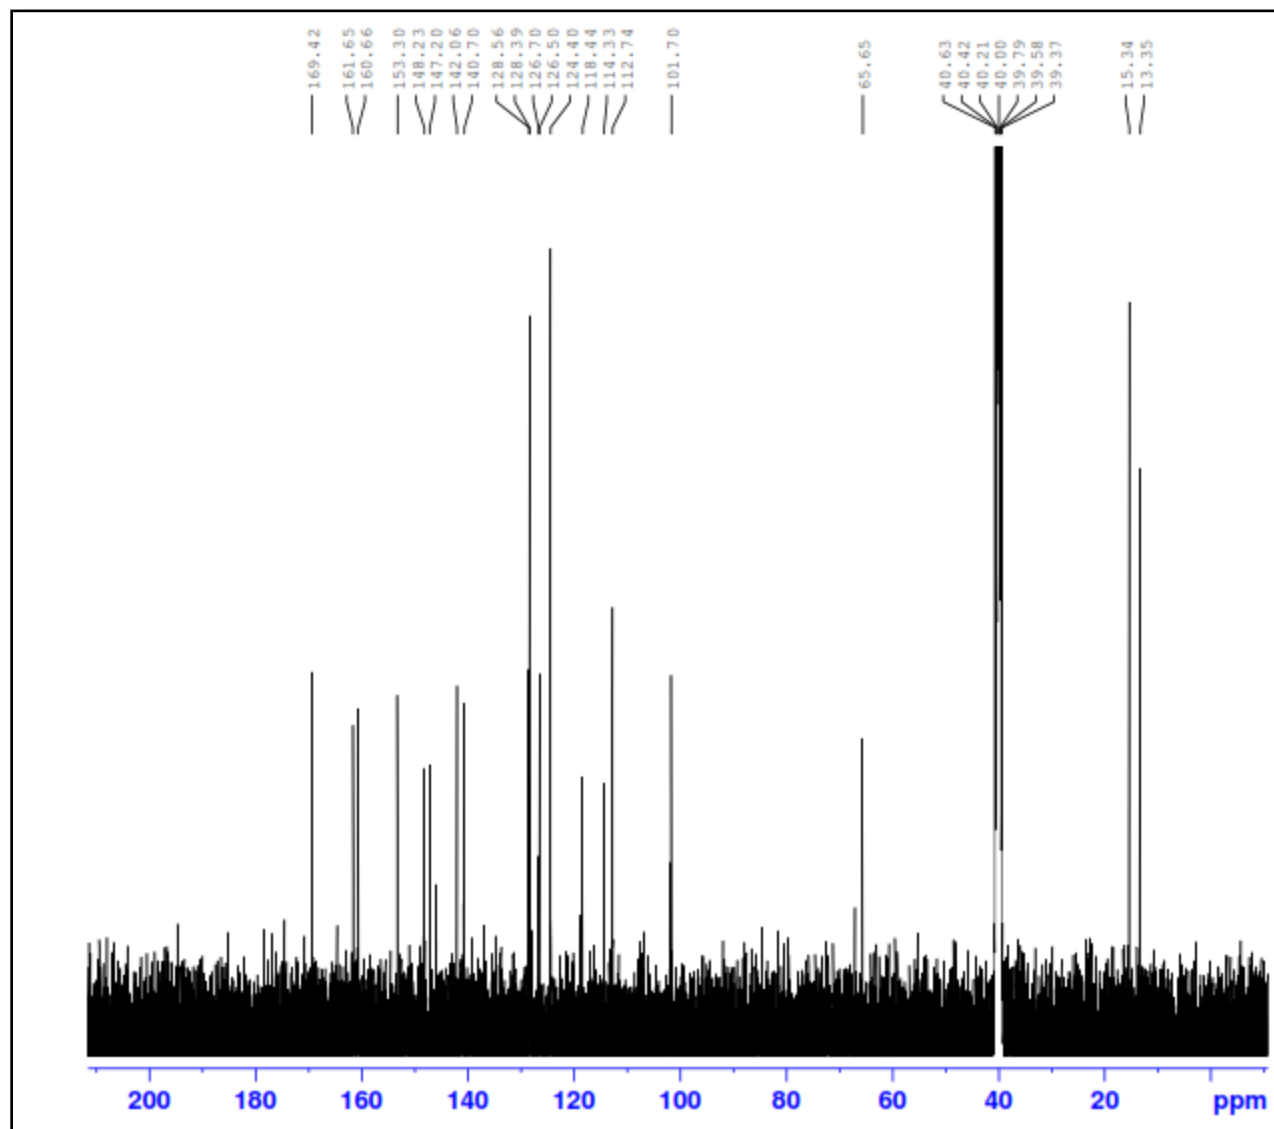

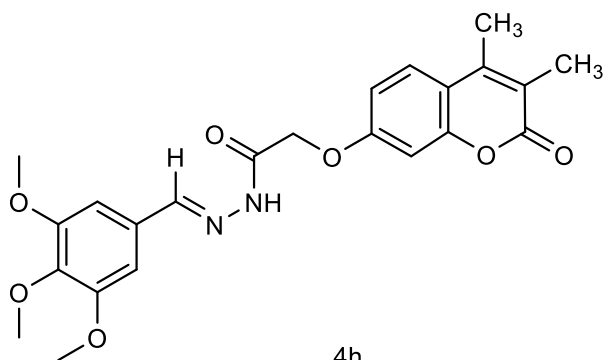

4h

**2-((3,4-dimethyl-2-oxo-2H-chromen-7-yl)oxy)-N'-(3,4,5-trimethoxybenzylidene)acetohydrazide**

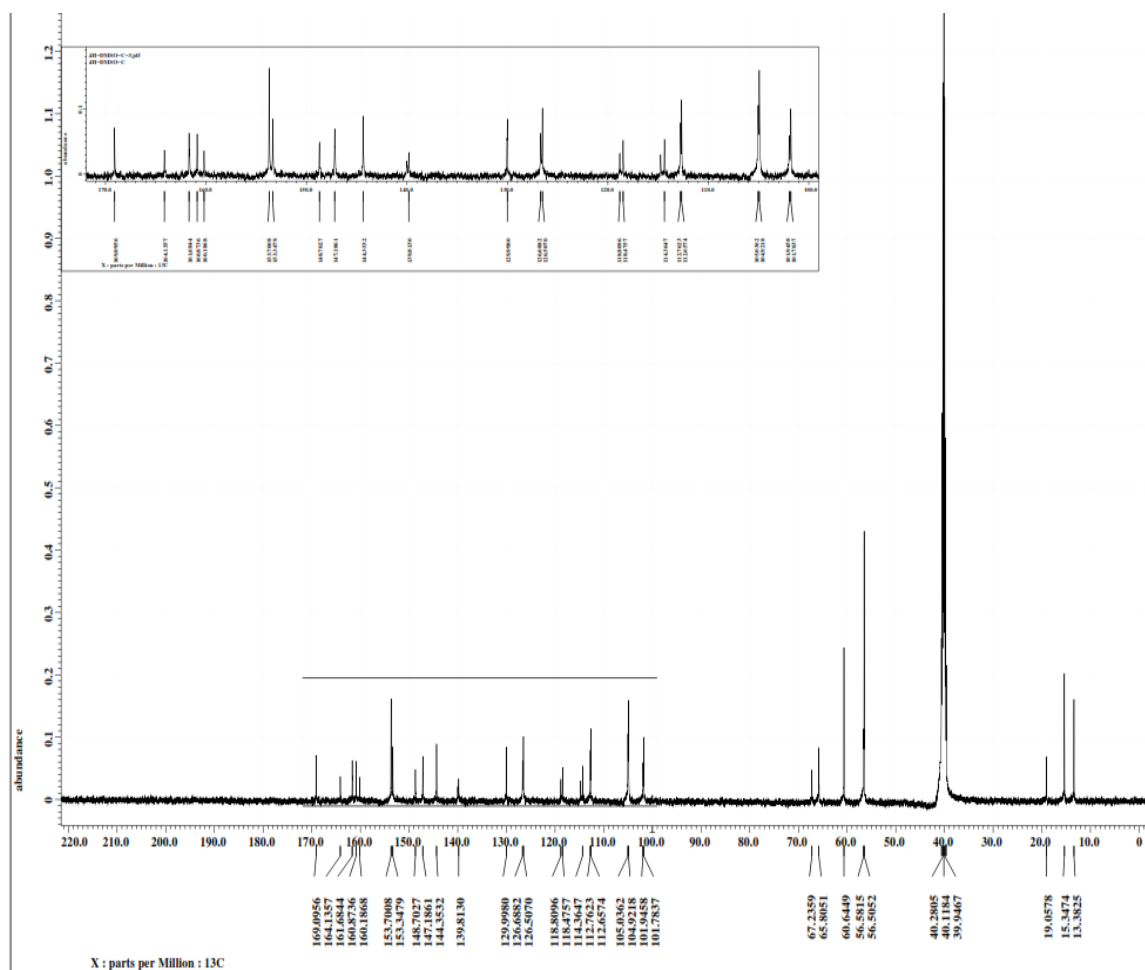

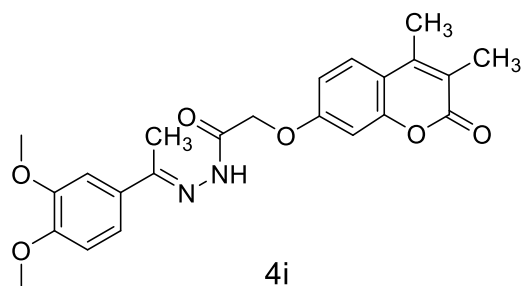

**N'-(1-(3,4-dimethoxyphenyl)ethylidene)-2-((3,4-dimethyl-2-oxo-2H-chromen-7-yl)oxy)acetohydrazide**

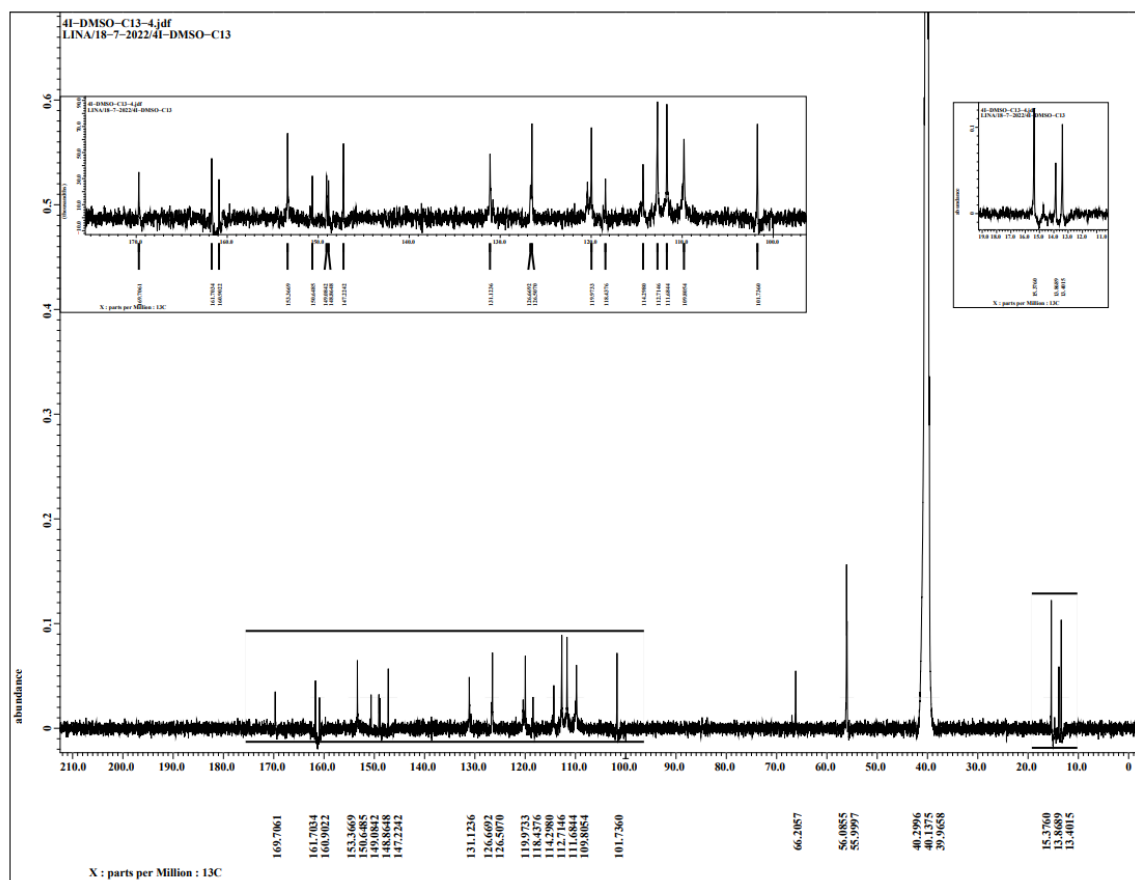

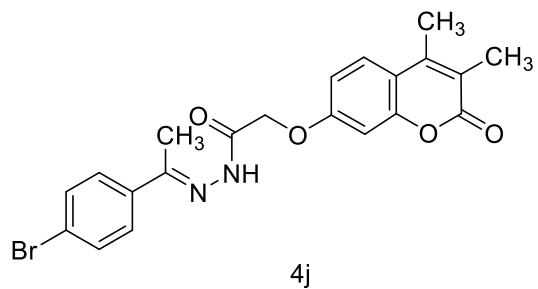

**N'-(1-(4-bromophenyl)ethylidene)-2-((3,4-dimethyl-2-oxo-2H-chromen-7-yl)oxy)acetohydrazide**

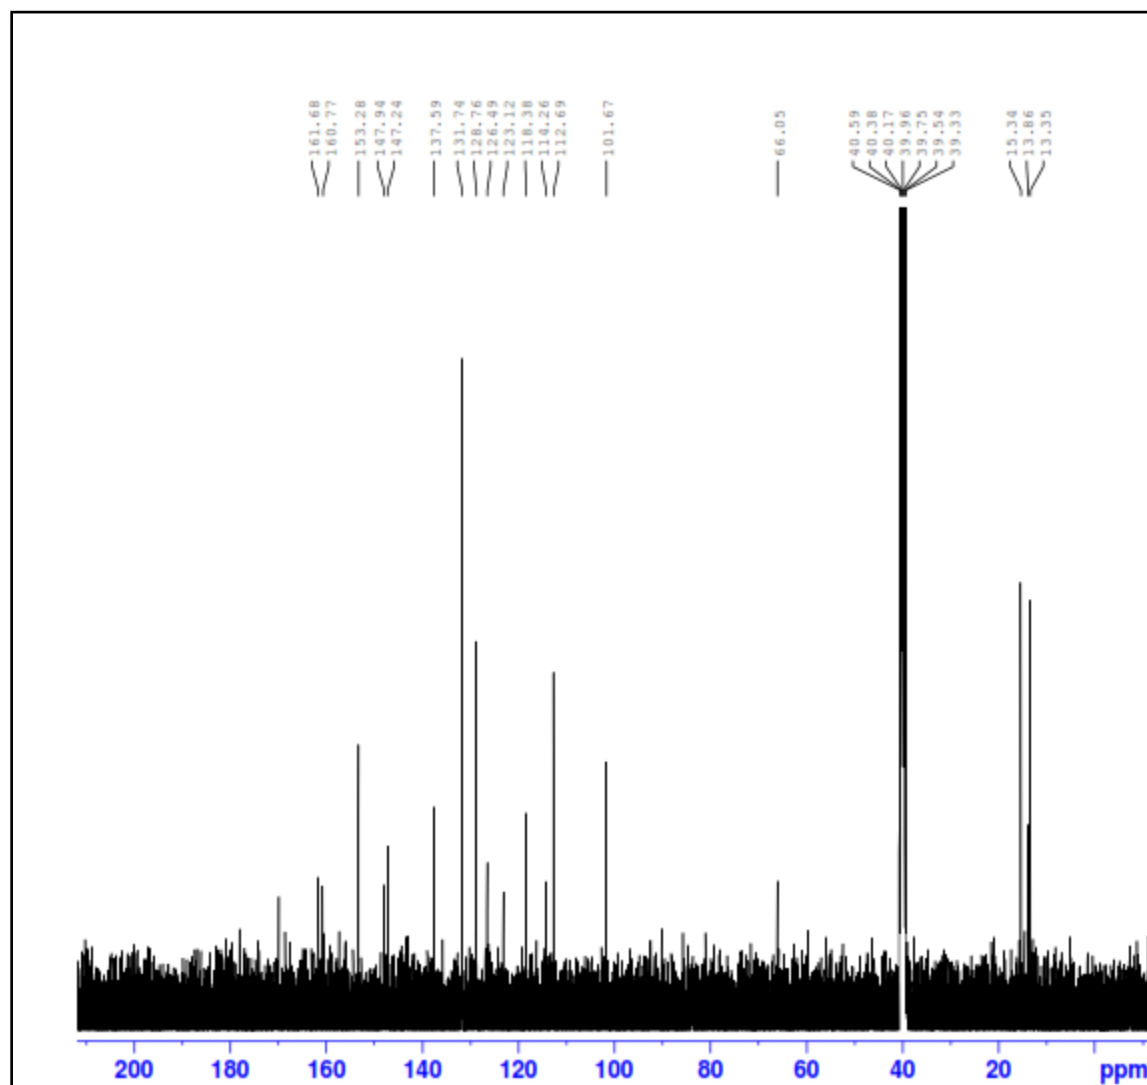

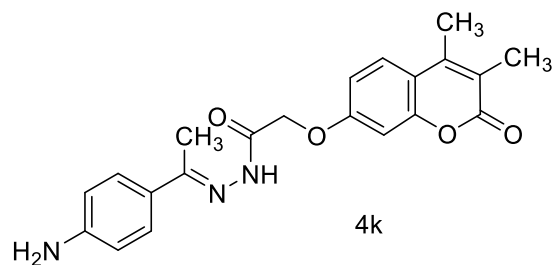

**N'-(1-(4-aminophenyl)ethylidene)-2-((3,4-dimethyl-2-oxo-2H-chromen-7-yl)oxy)acetohydrazide**

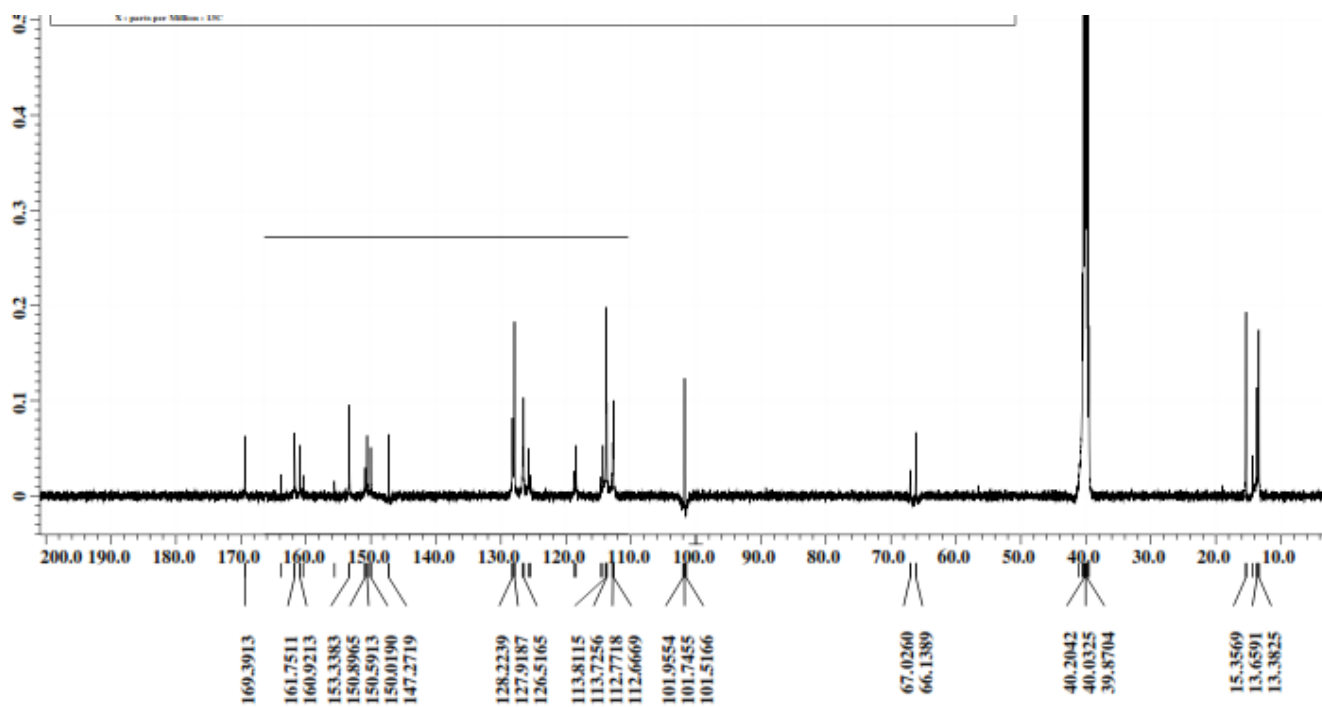



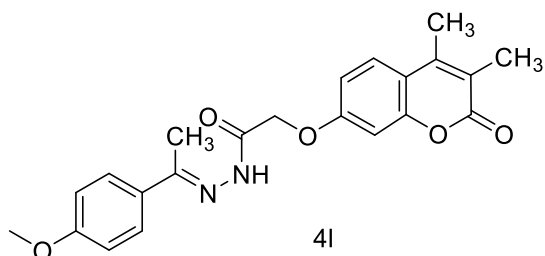

**2-((3,4-dimethyl-2-oxo-2H-chromen-7-yl)oxy)-N'-(1-(4-methoxyphenyl)ethylidene)acetohydrazide**

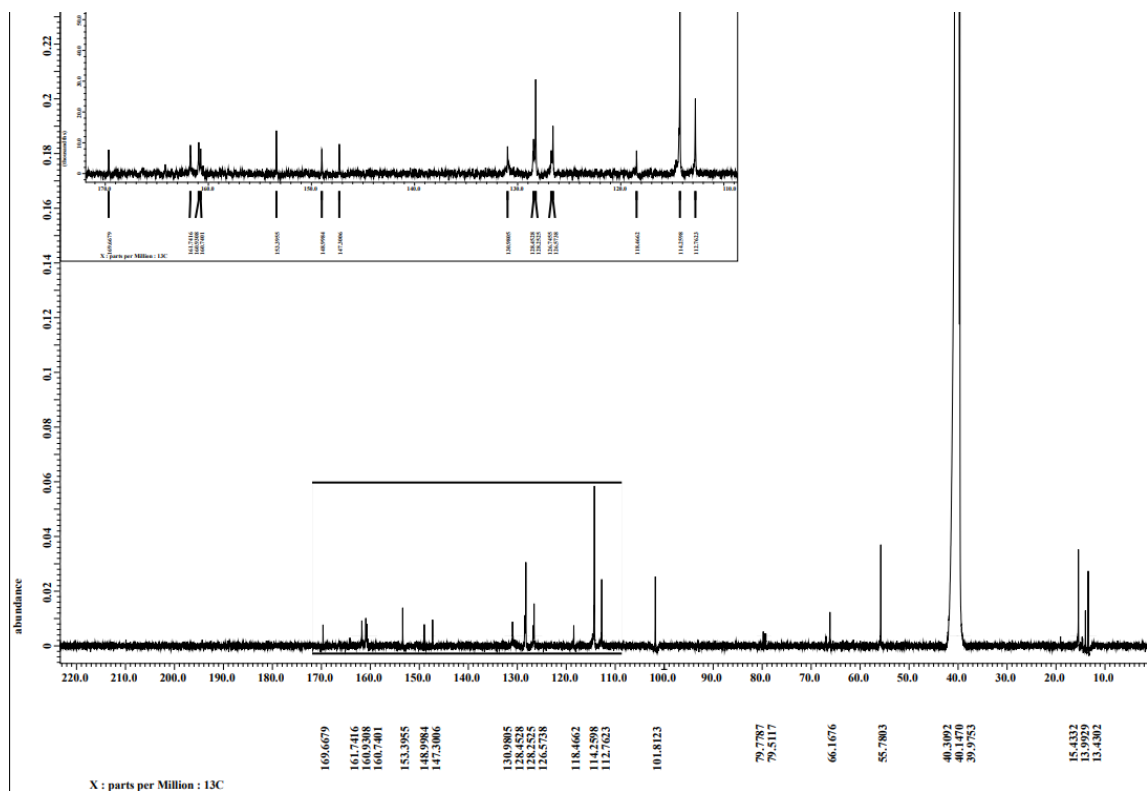

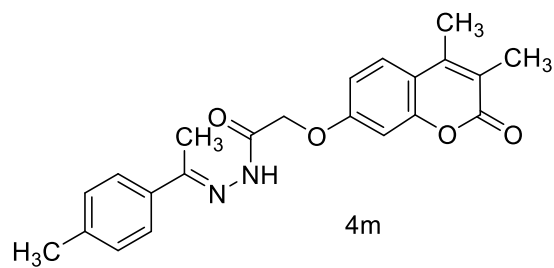

**2-((3,4-dimethyl-2-oxo-2H-chromen-7-yl)oxy)-N'-(1-(p-tolyl)ethylidene)acetohydrazide**

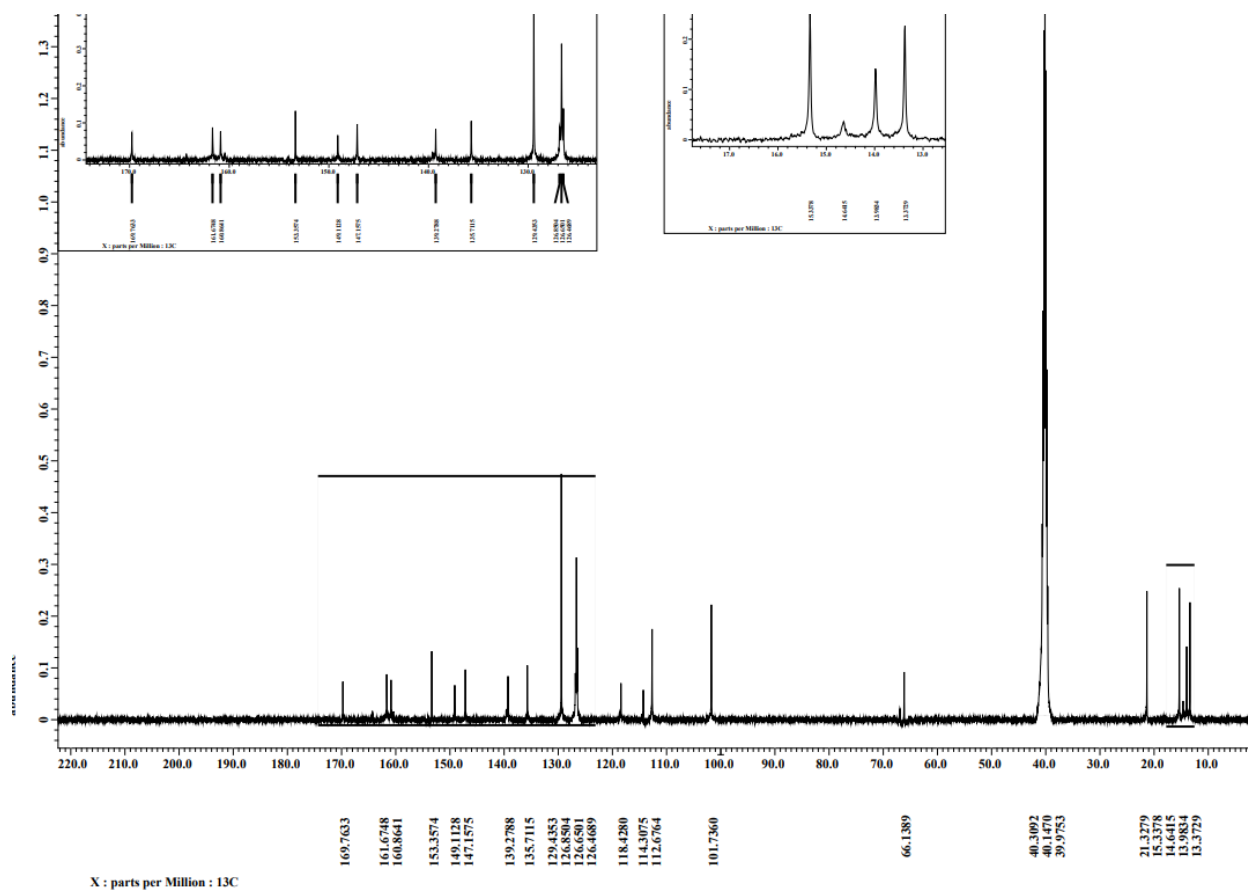

## Supplementary Data

(New Journal of Chemistry)

### Coumarin-Acetohydrazone Derivatives as Novel Antiproliferative Agents via VEGFR-2/AKT Axis Inhibition and Apoptosis Triggering

Lina M.A. Abdel Ghany,<sup>a</sup> Nehad M. El-Dydamony,<sup>a</sup> Amira A. Helwa,<sup>\*b</sup> Sahar M. Abdelraouf,<sup>c</sup> Rana M. Abdelnaby<sup>d</sup>

#### MASS

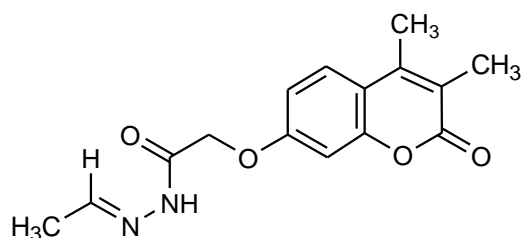

4a

rana-mohamed-103 #180-188 RT: 3.03-3.16 AV: 9 NL: 1.10E2  
T: + c EI Full ms [40.00-1000.00]

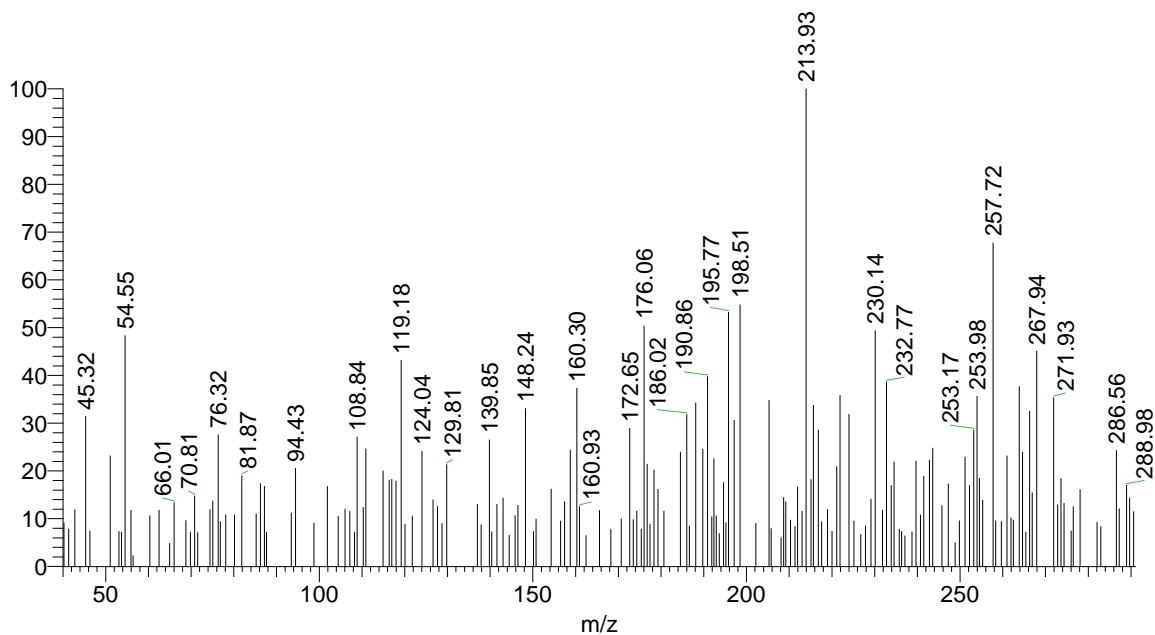

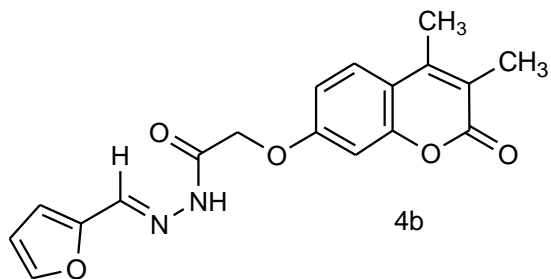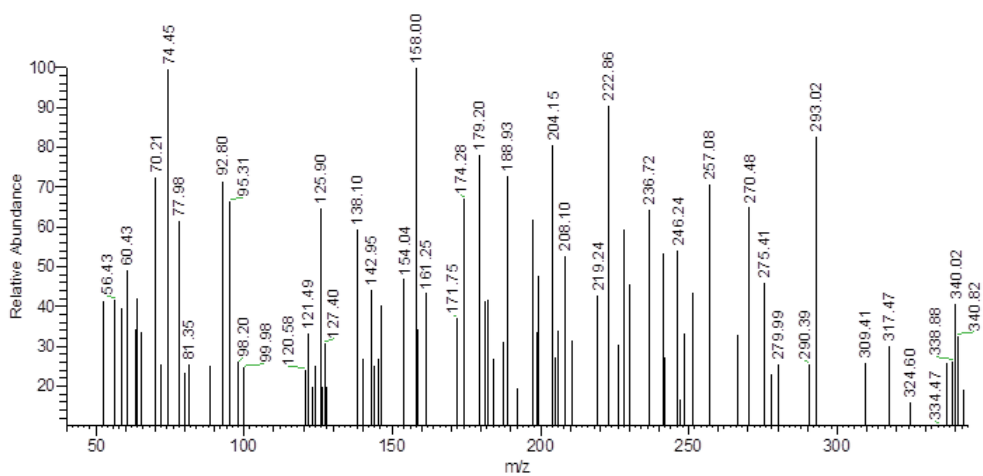

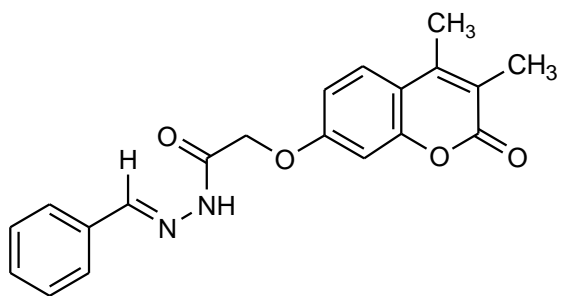

4c

rana-mohamed-106 #280 RT: 4.70 AV: 1 NL: 3.00E2  
T: + c EI Full ms [40.00-1000.00]

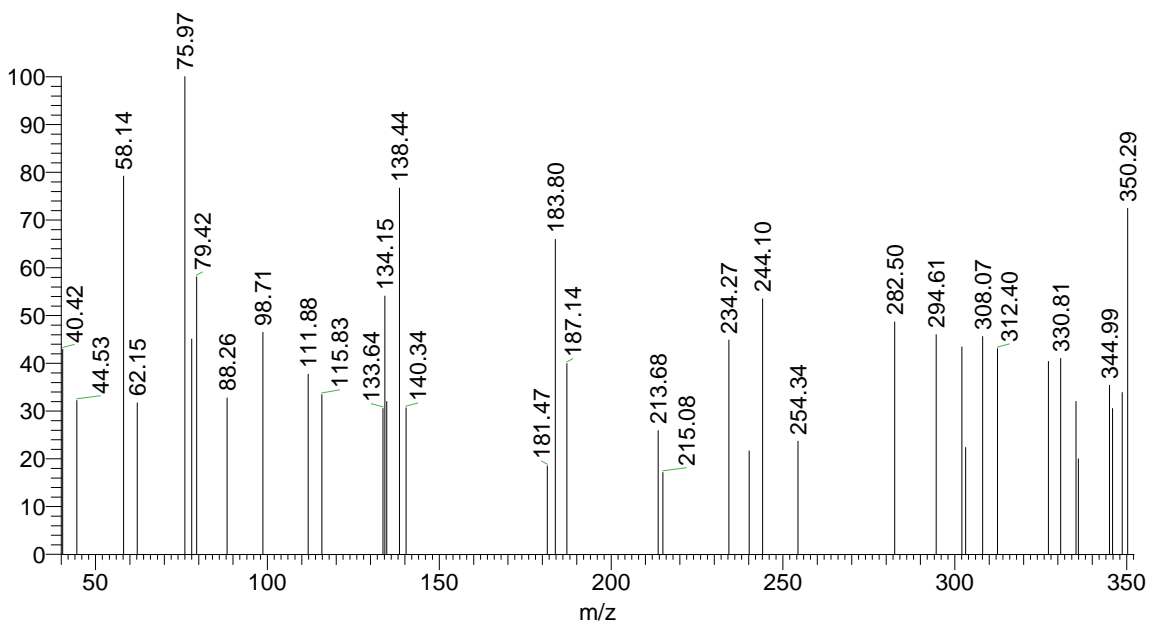

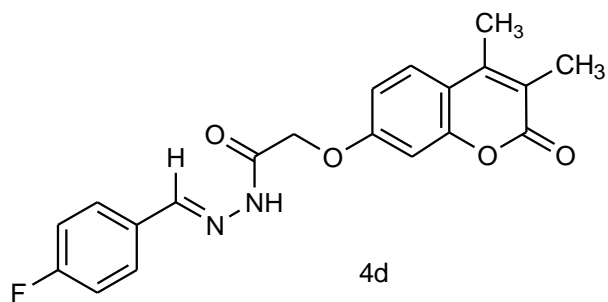

rana-mohamed-105 #161 RT: 2.71 AV: 1 NL: 6.46E2  
T: + c EI Full ms [40.00-1000.00]

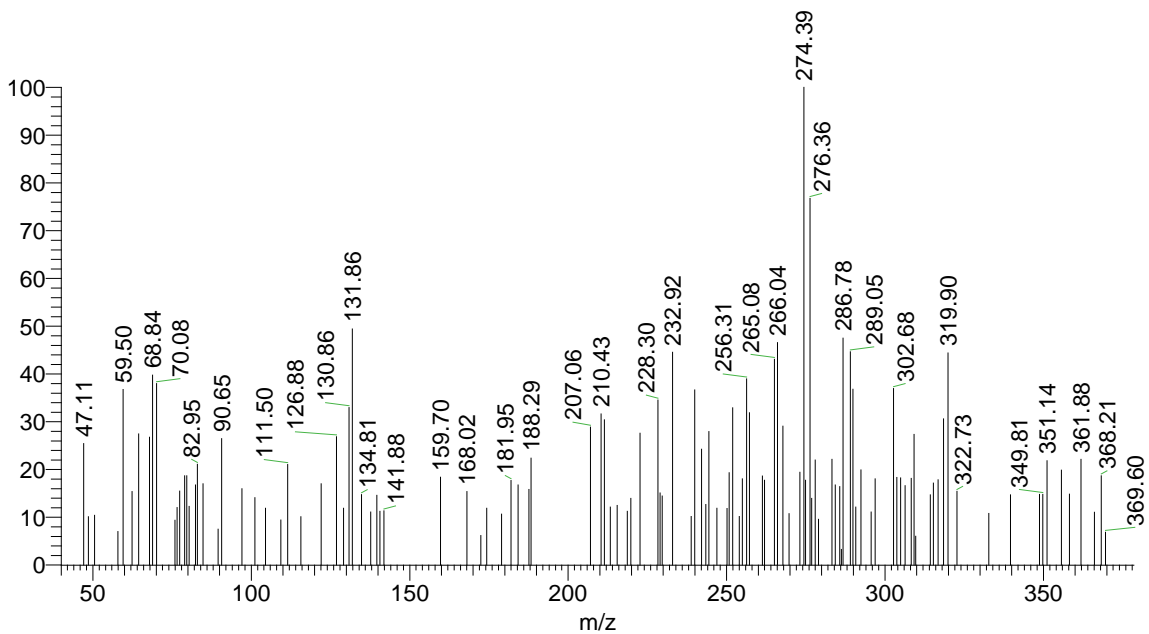

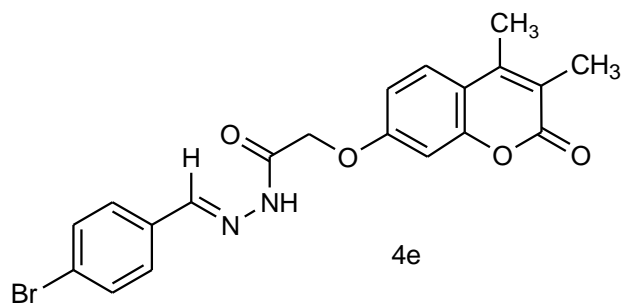

rana-mohamed-108 #276 RT: 4.64 AV: 1 NL: 4.85E2  
 T: + c EI Full ms [40.00-1000.00]

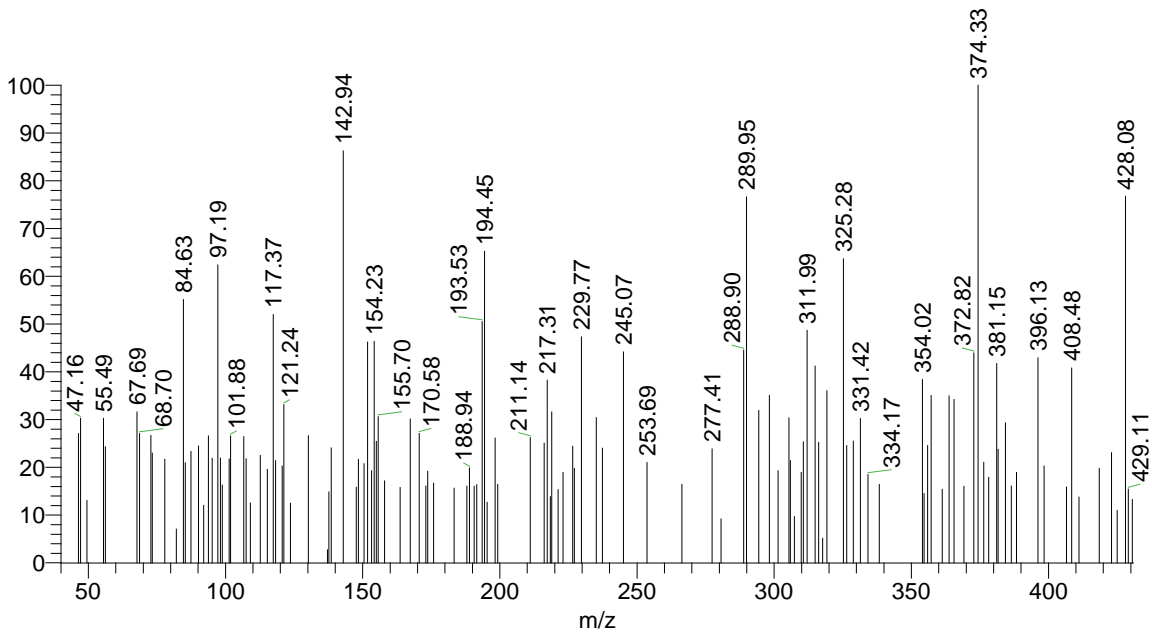

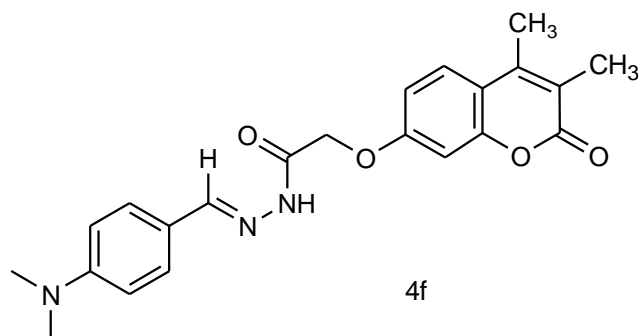

rana-mohamed-101 #69 RT: 1.17 AV: 1 NL: 3.29E2  
T: + c EI Full ms [40.00-1000.00]

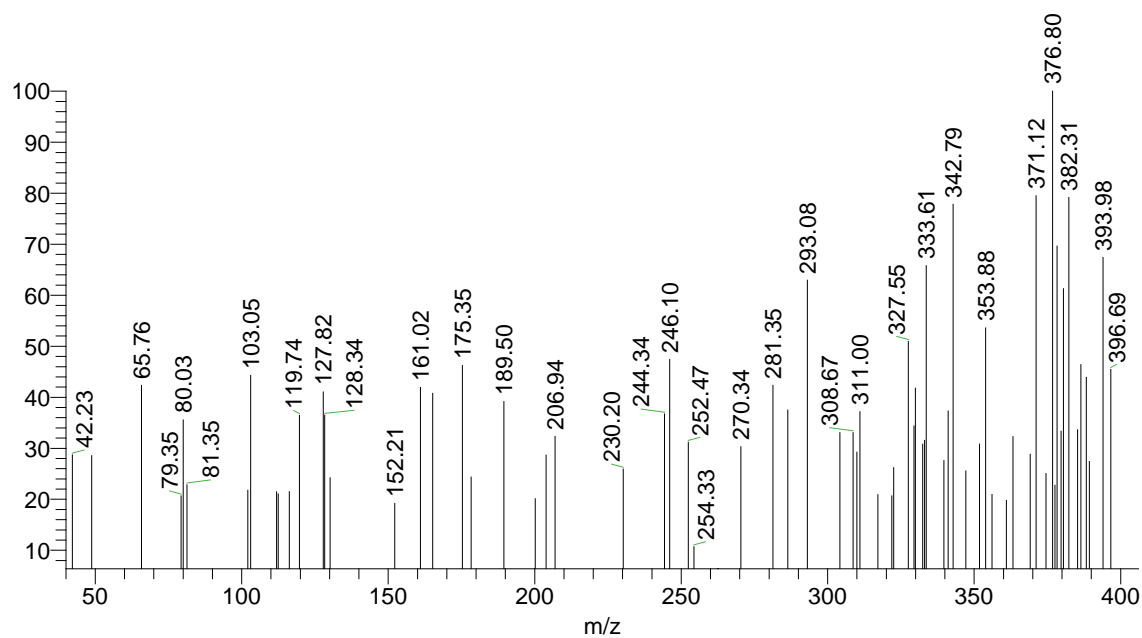



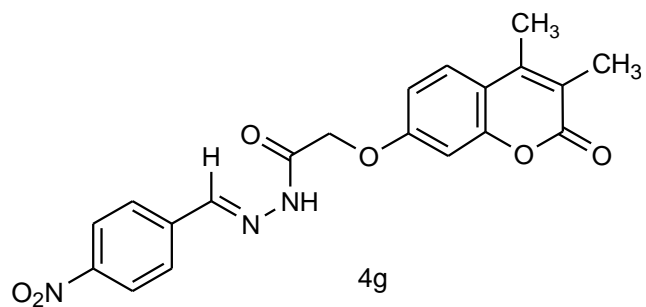

rana-mohamed-coNo2 #175 RT: 2.95 AV: 1 NL: 2.59E2  
T: + c EI Full ms [40.00-1000.00]

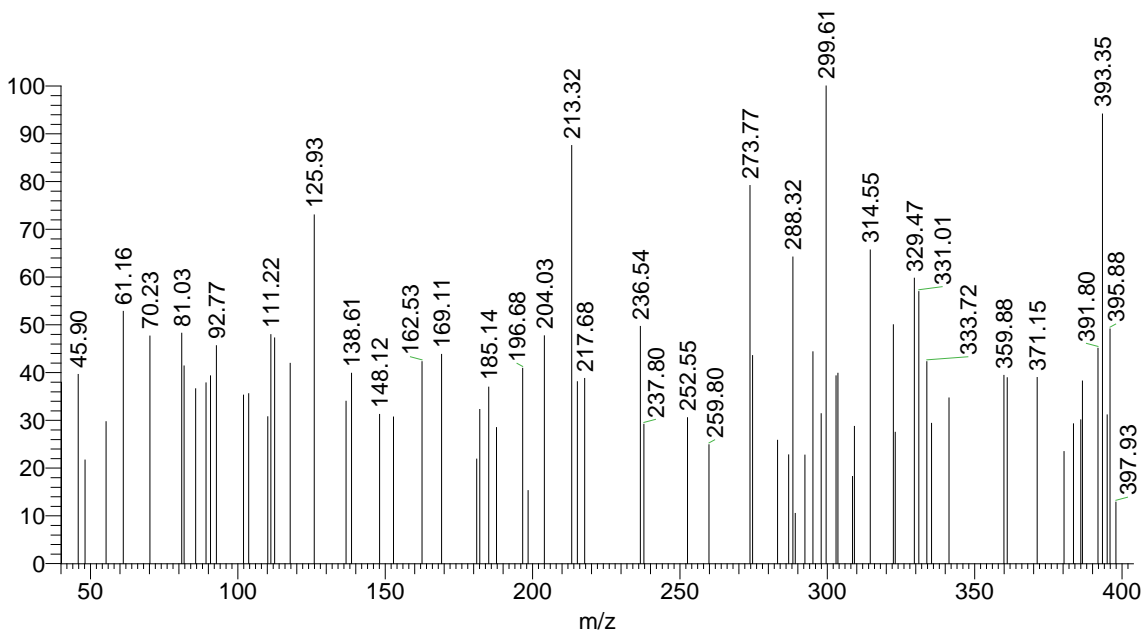

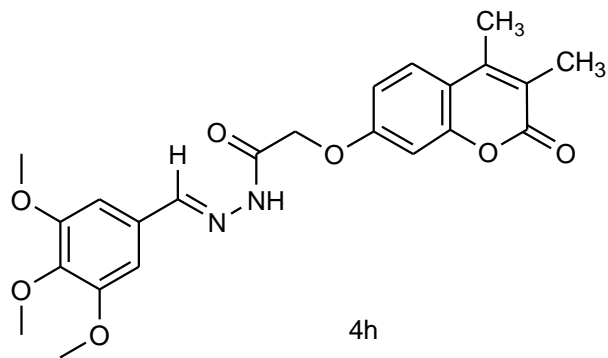

rana-mohamed-102 #216 RT: 3.63 AV: 1 NL: 5.11E2  
T: + c EI Full ms [40.00-1000.00]

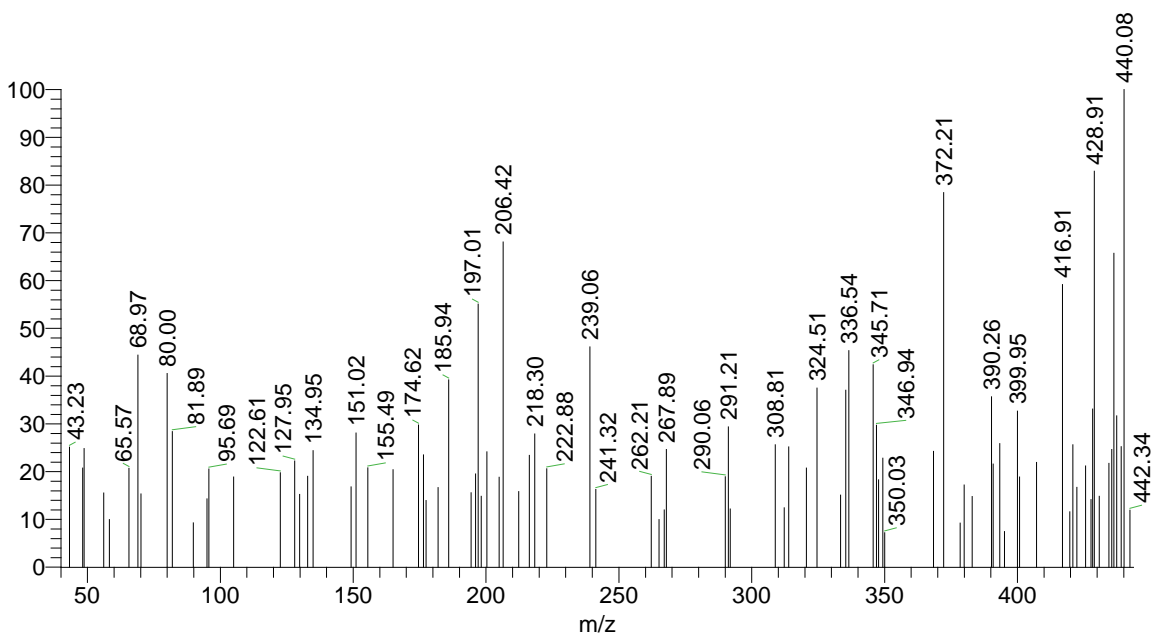

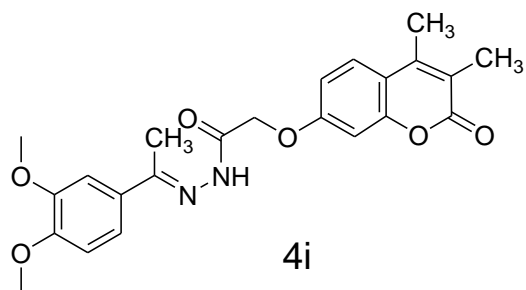

rana-mohamed-107 #45 RT: 0.77 AV: 1 NL: 3.53E2  
T: + c EI Full ms [40.00-1000.00]

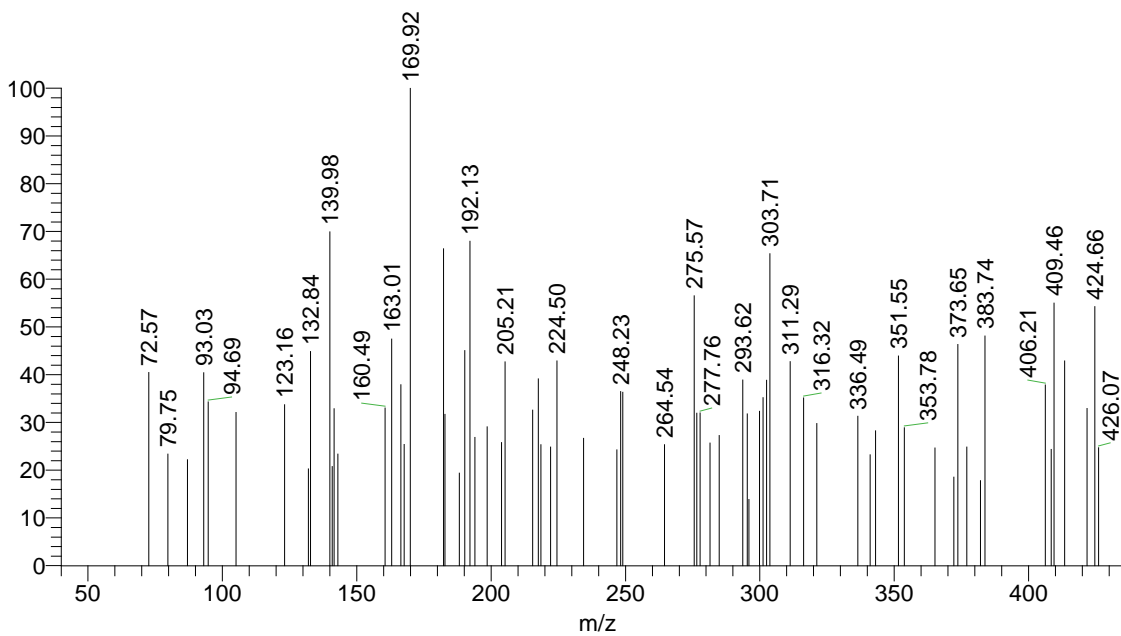

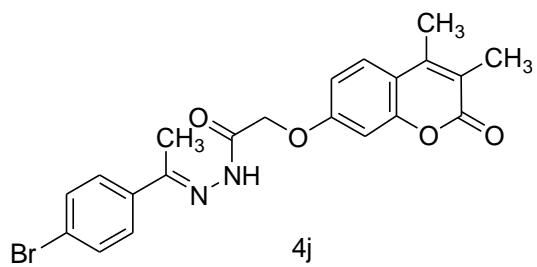

rana-mohamed-100 #240 RT: 4.03 AV: 1 NL: 3.01E2  
T: + c EI Full ms [40.00-1000.00]

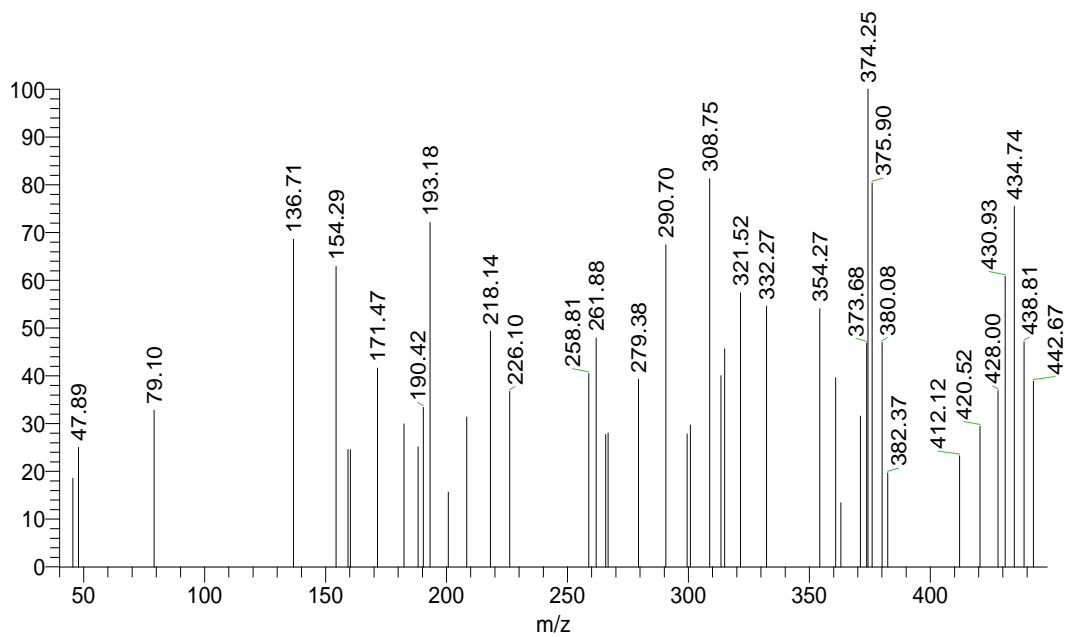

# IR Spectra

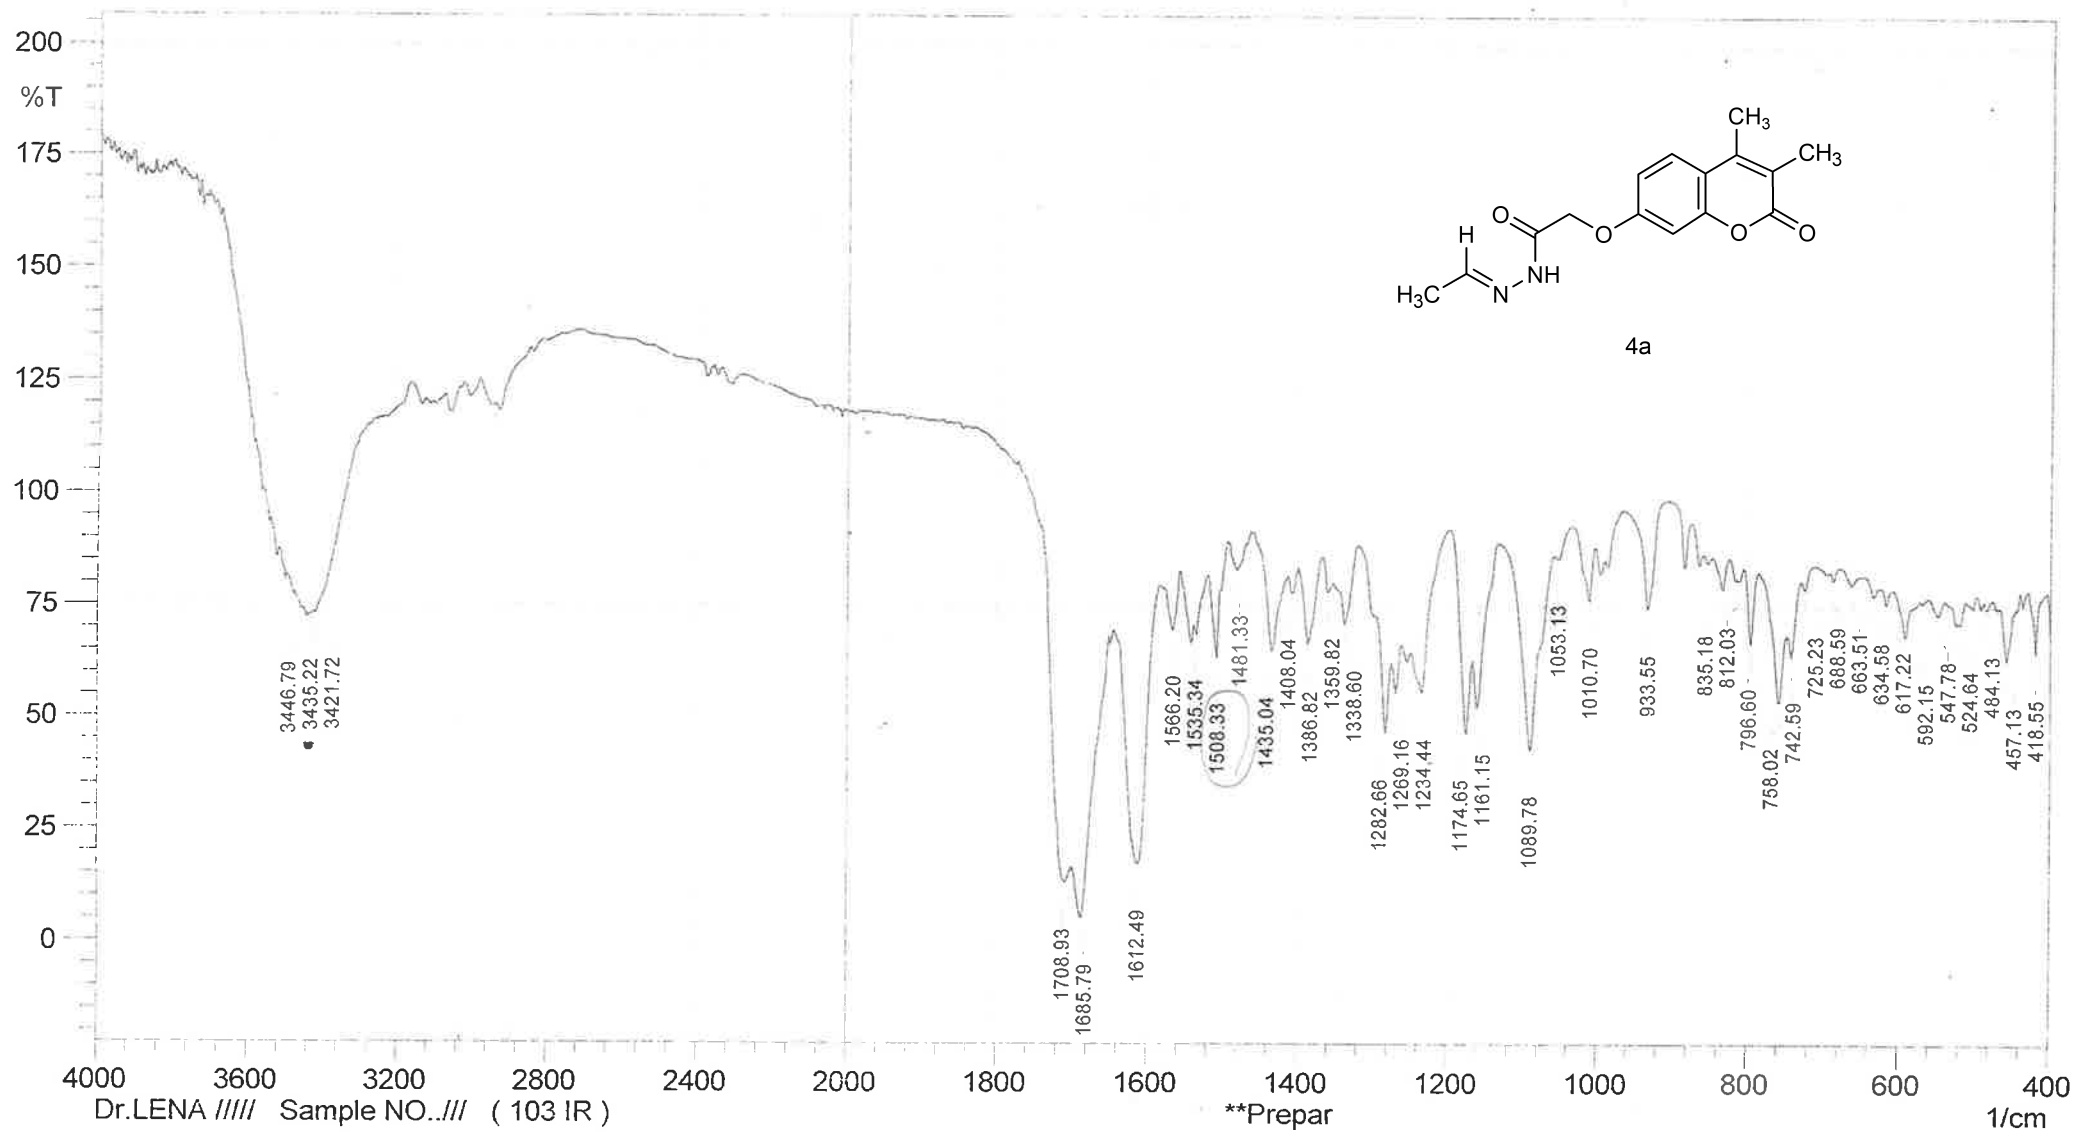

Comment;  
Dr.LENA // Sample NO. // ( 103 IR )  
\*\*Prepared By : Dr.Ahmed A.EL-Wakeel , Ph.D.

Date/Time; 4/30/2010 2:12:07 AM  
No. of Scans; 10  
Resolution; 4 [1/cm]  
Apodization; Happ-Genzel  
User; Heinrich

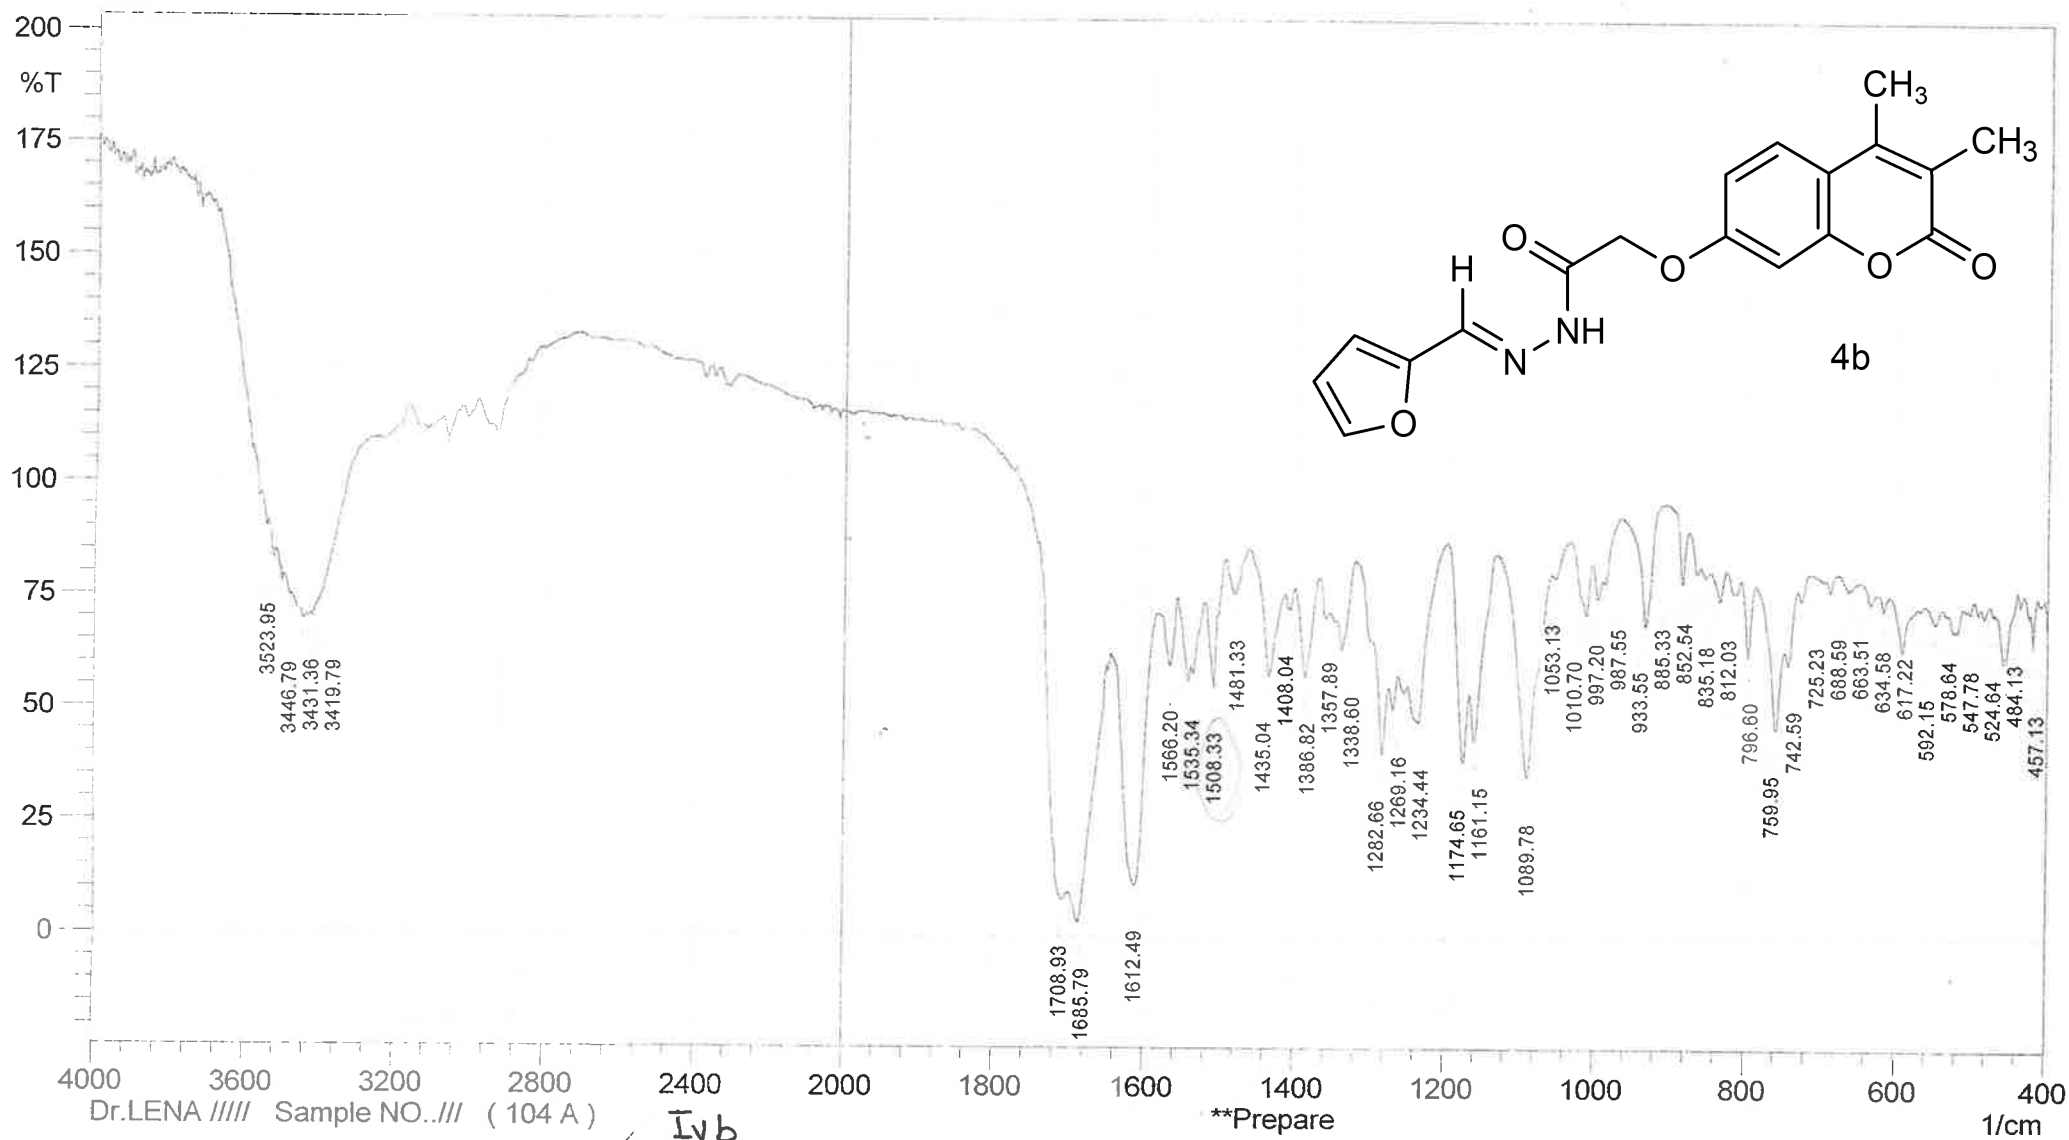

Comment;  
 Dr.LENA //// Sample NO.//// ( 104 A )  
 \*\*Prepared By : Dr.Ahmed A.EL-Wakeel , Ph.D.

Date/Time; 4/30/2010 2:58:26 AM  
 No. of Scans; 10  
 Resolution; 4 [1/cm]  
 Apodization; Happ-Genzel  
 User; Heinrich

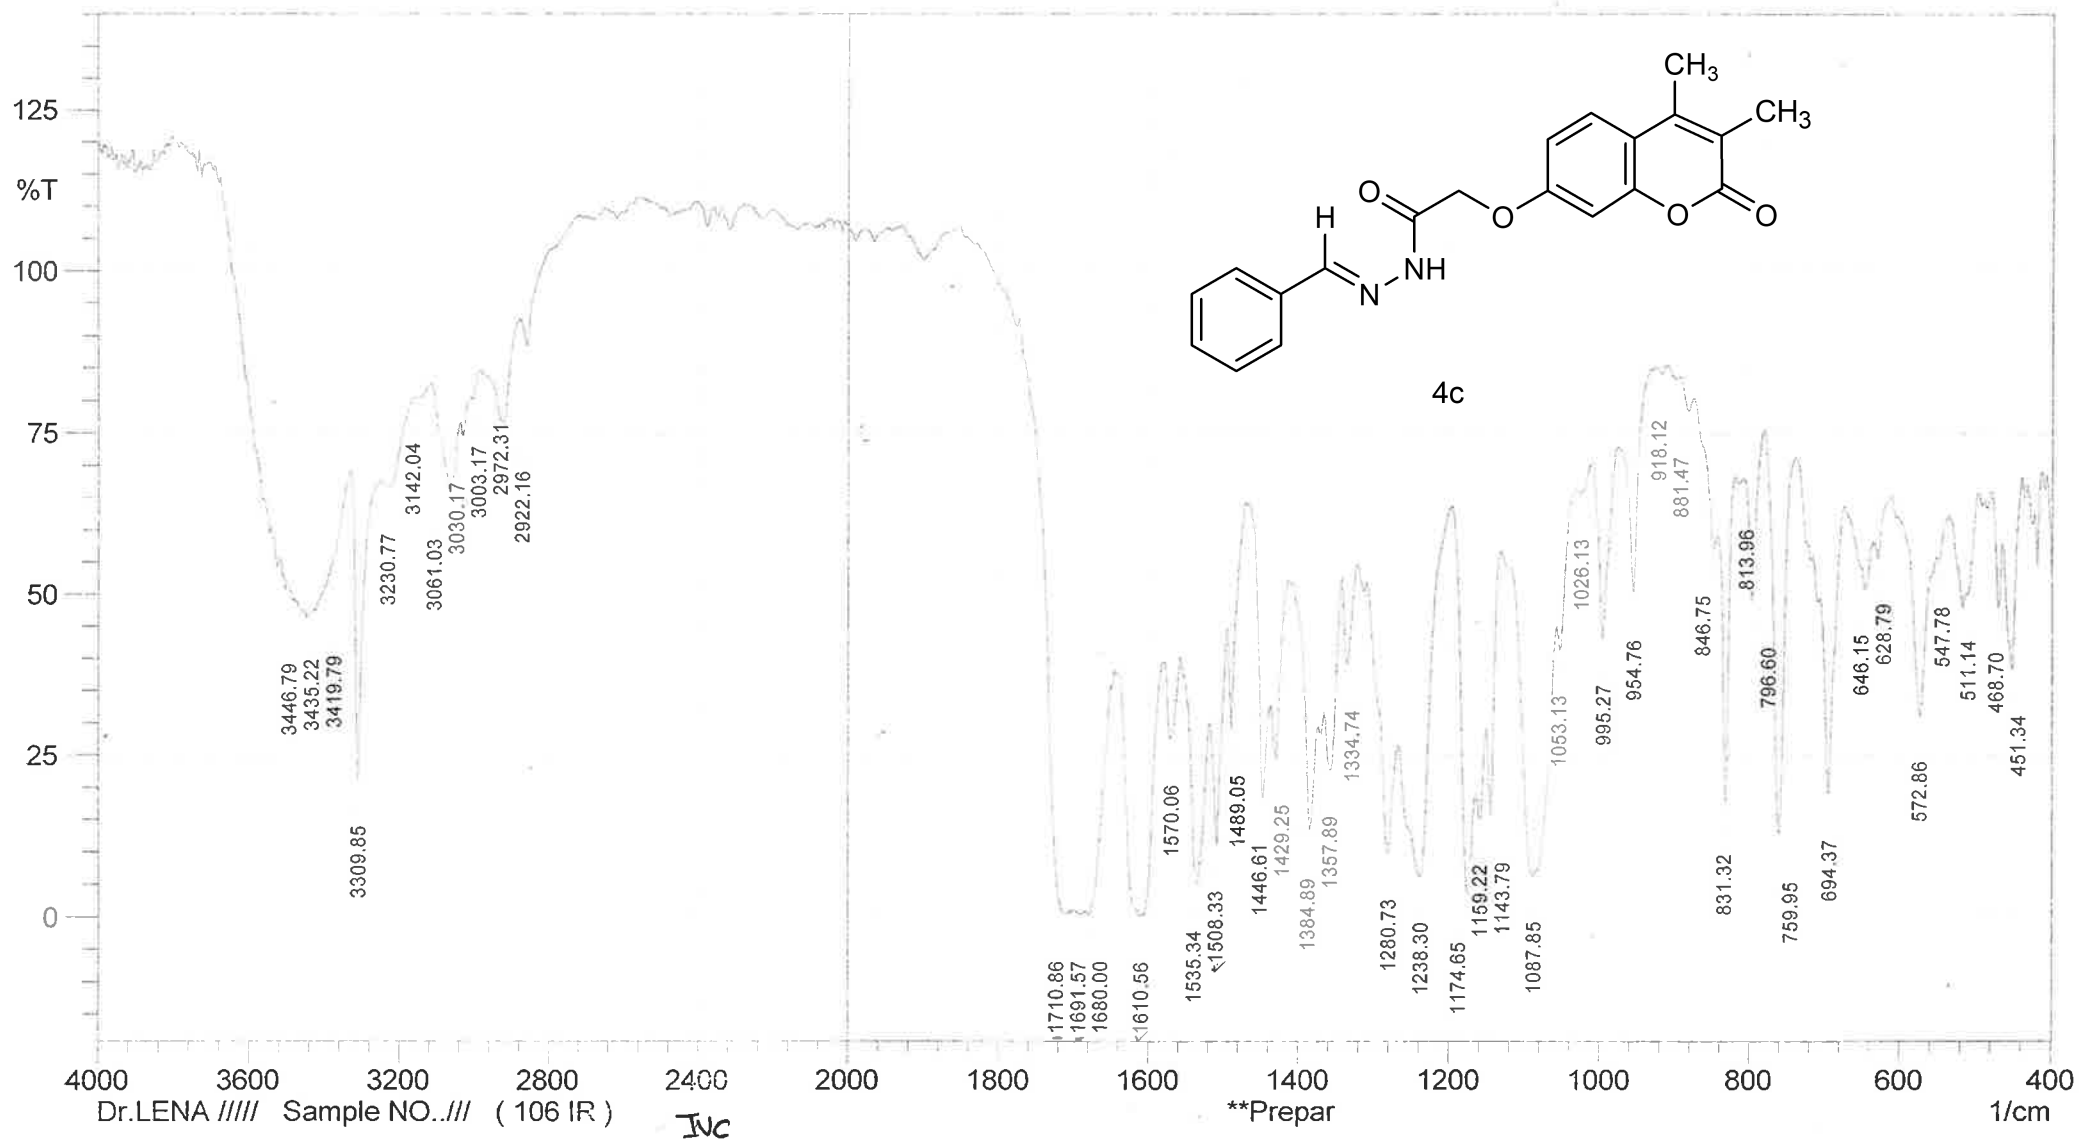

Comment;  
 Dr.LENA //// Sample NO.//// ( 106 IR )  
 \*\*Prepared By : Dr.Ahmed A.EL-Wakeel , Ph.D.

Date/Time; 4/30/2010 4:06:31 AM  
 No. of Scans; 10  
 Resolution; 4 [1/cm]  
 Apodization; Happ-Genzel  
 User; Heinrich

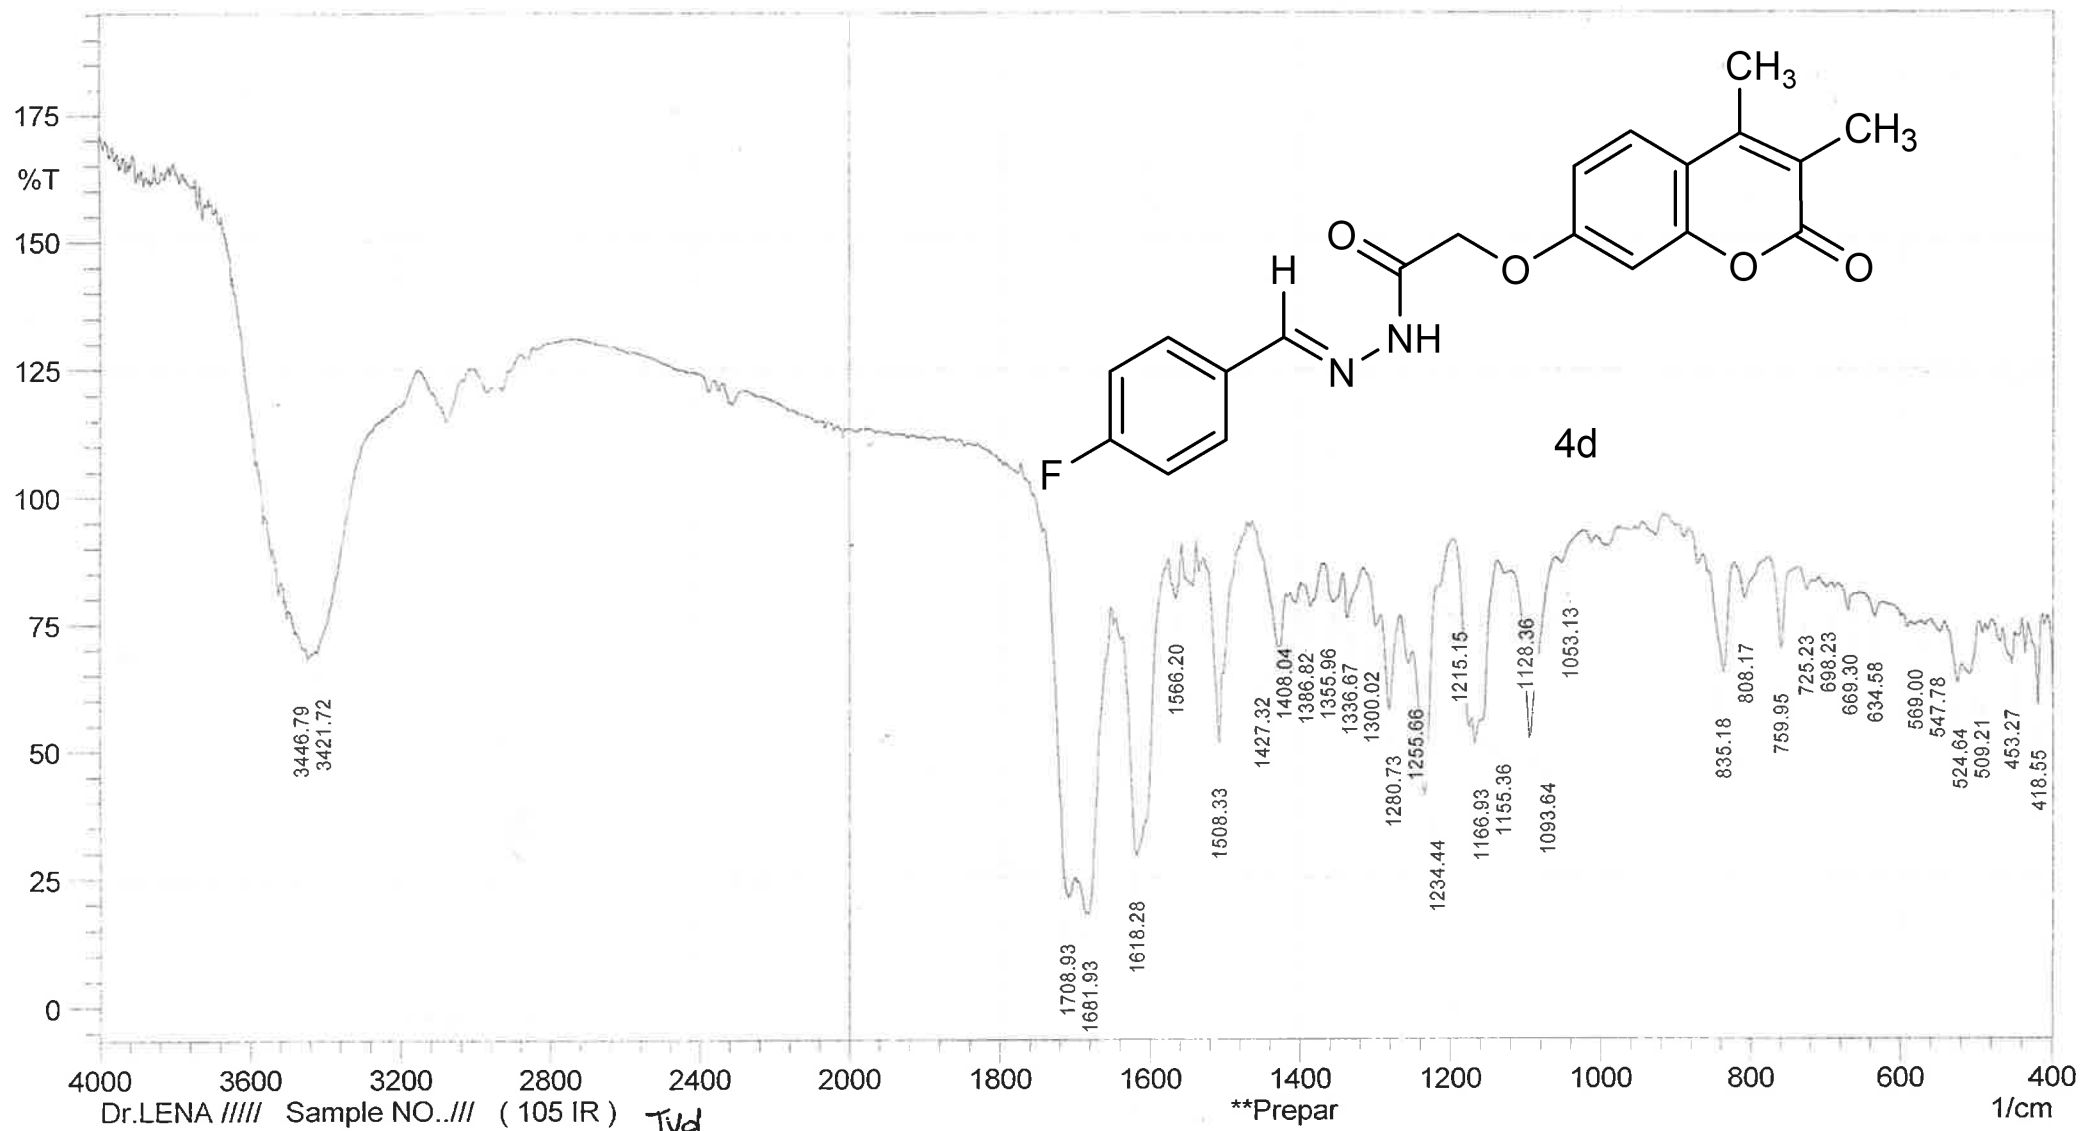

Comment;  
 Dr.LENA //// Sample NO.//// (105 IR )  
 \*\*Prepared By : Dr.Ahmed A.EL-Wakeel , Ph.D.

Date/Time; 4/30/2010 3:16:28 AM  
 No. of Scans; 10  
 Resolution; 4 [1/cm]  
 Apodization; Happ-Genzel  
 User; Heinrich



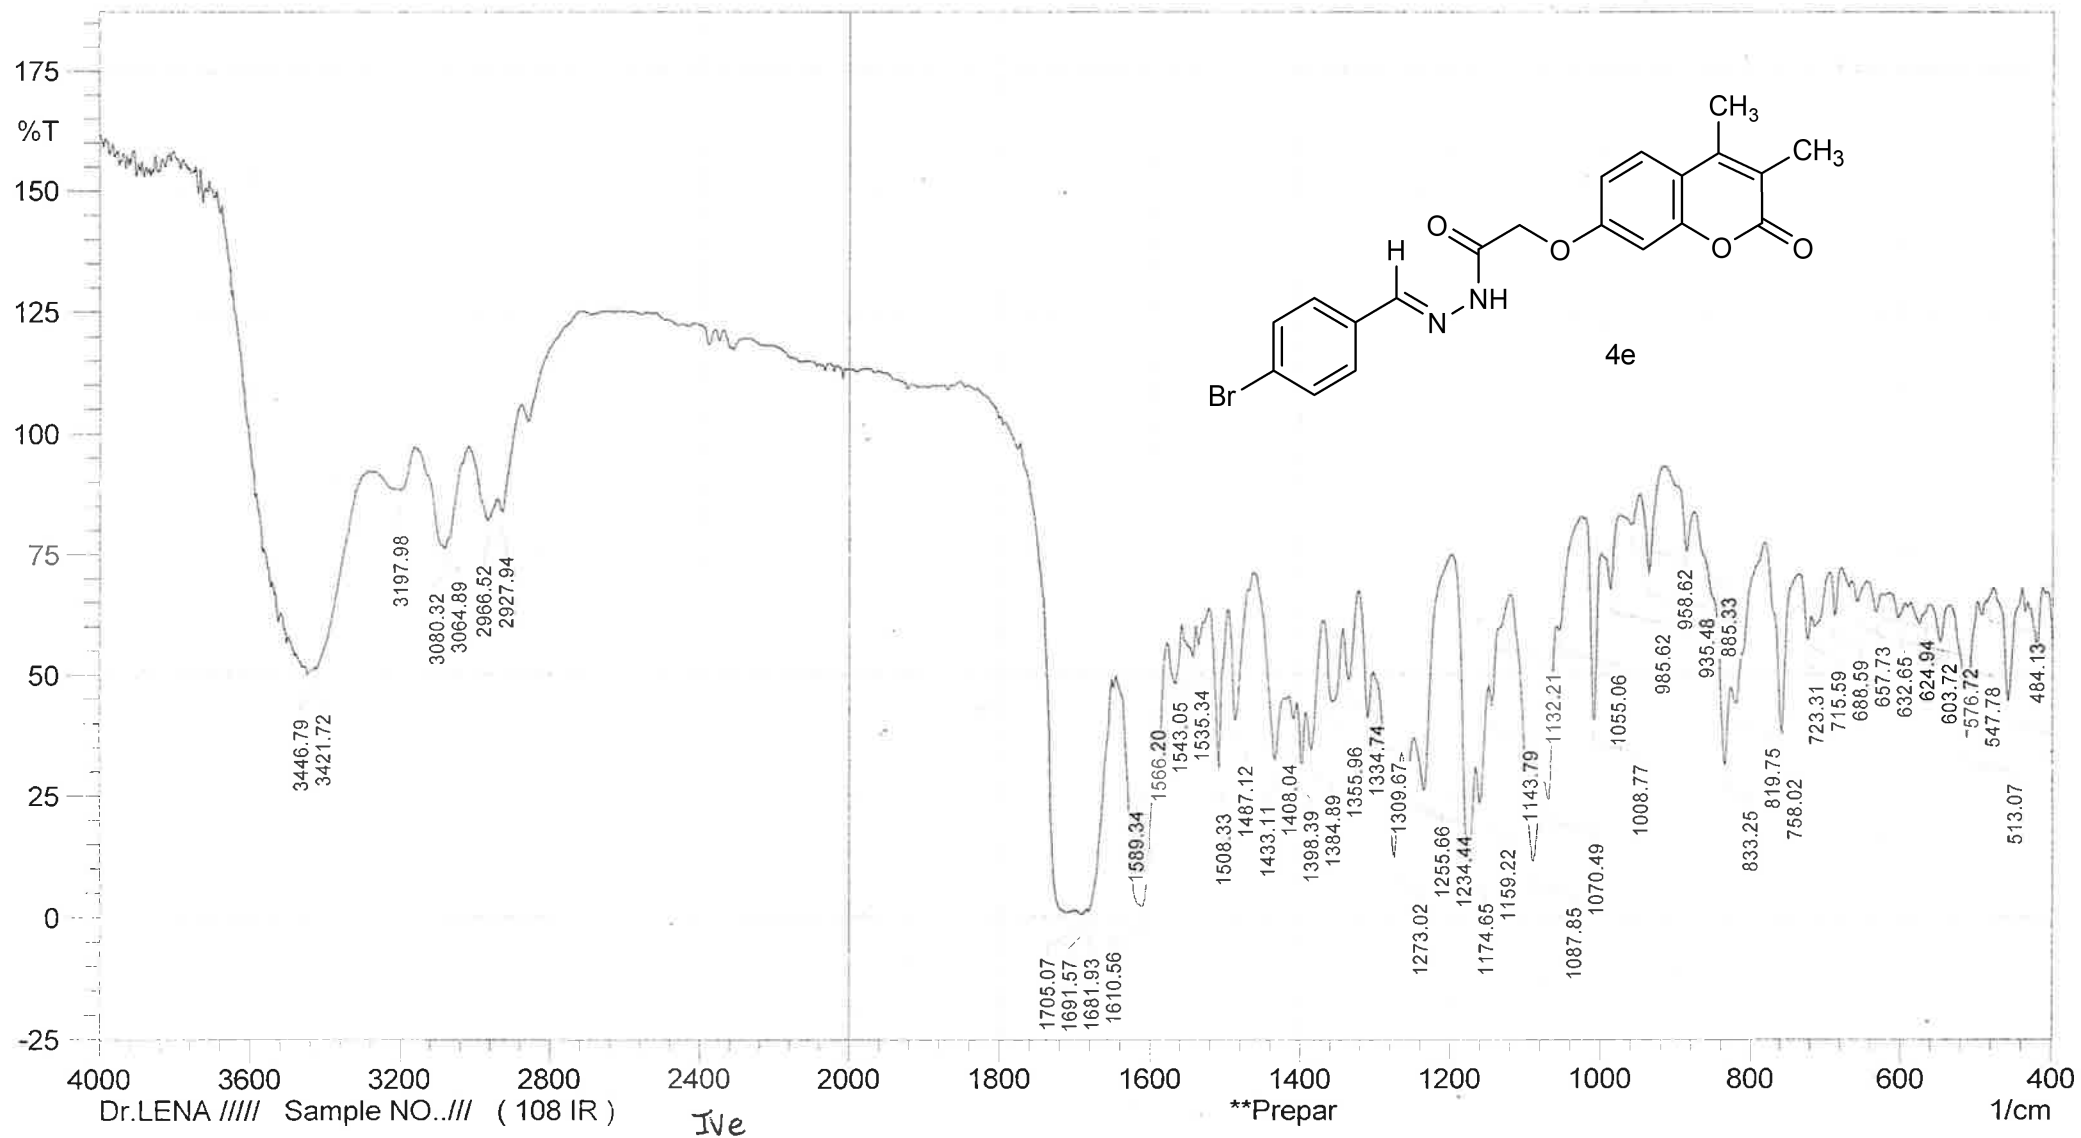

Comment;  
 Dr.LENA // Sample NO. // ( 108 IR )  
 \*\*Prepared By : Dr.Ahmed A.EL-Wakeel , Ph.D.

Date/Time; 4/30/2010 4:48:06 AM  
 No. of Scans; 10  
 Resolution; 4 [1/cm]  
 Apodization; Happ-Genzel  
 User; Heinrich

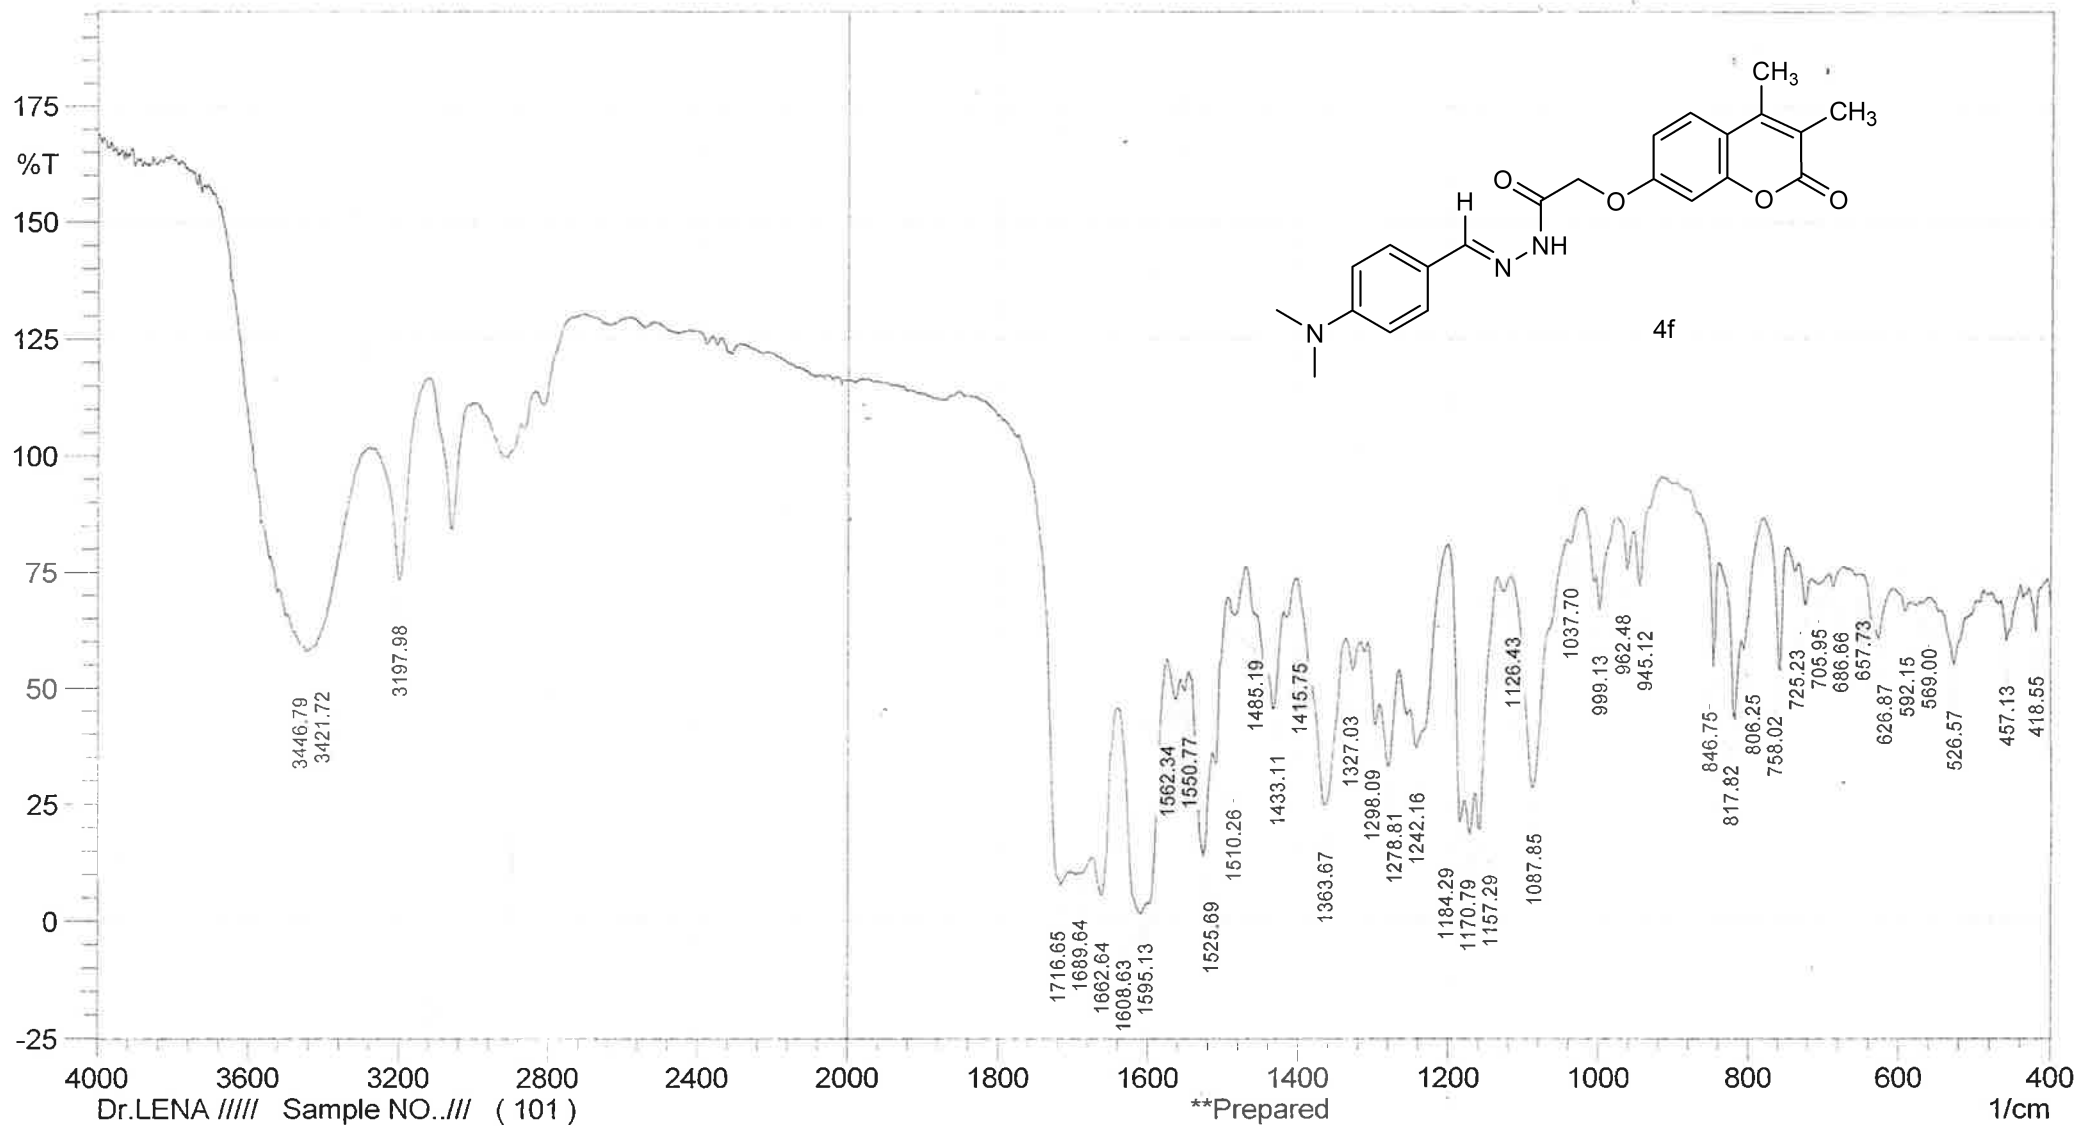

Comment;  
 Dr.LENA //// Sample NO./// ( 101 )  
 \*\*Prepared By : Dr.Ahmed A.EL-Wakeel , Ph.D.

Date/Time; 4/30/2010 1:36:20 AM  
 No. of Scans; 10  
 Resolution; 4 [1/cm]  
 Apodization; Happ-Genzel  
 User; Heinrich

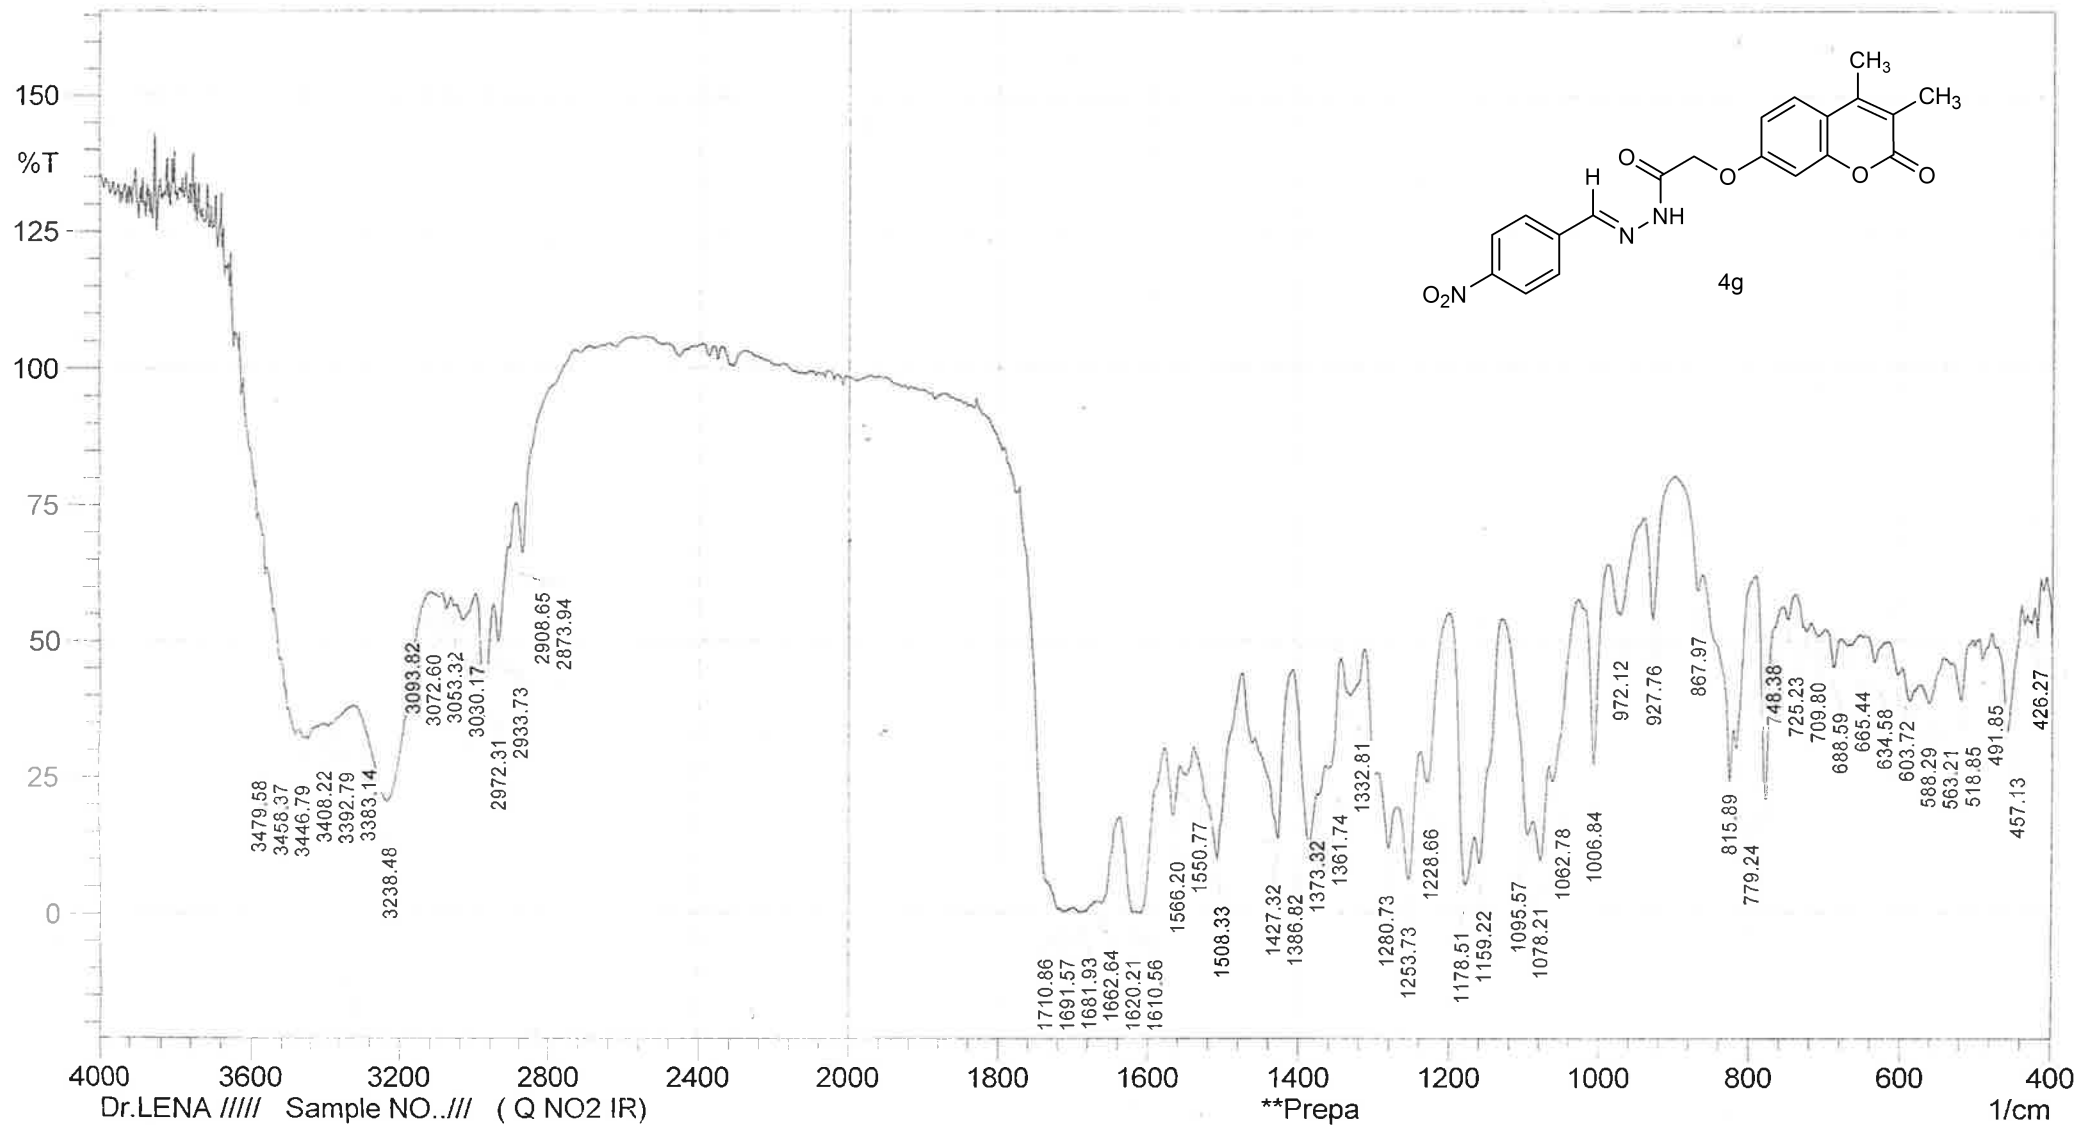

Comment;  
 Dr.LENA //// Sample NO.//// (Q NO2 IR)  
 \*\*Prepared By : Dr.Ahmed A.EL-Wakeel , Ph.D.

Date/Time; 4/30/2010 5:45:49 AM  
 No. of Scans; 10  
 Resolution; 4 [1/cm]  
 Apodization; Happ-Genzel  
 User; Heinrich

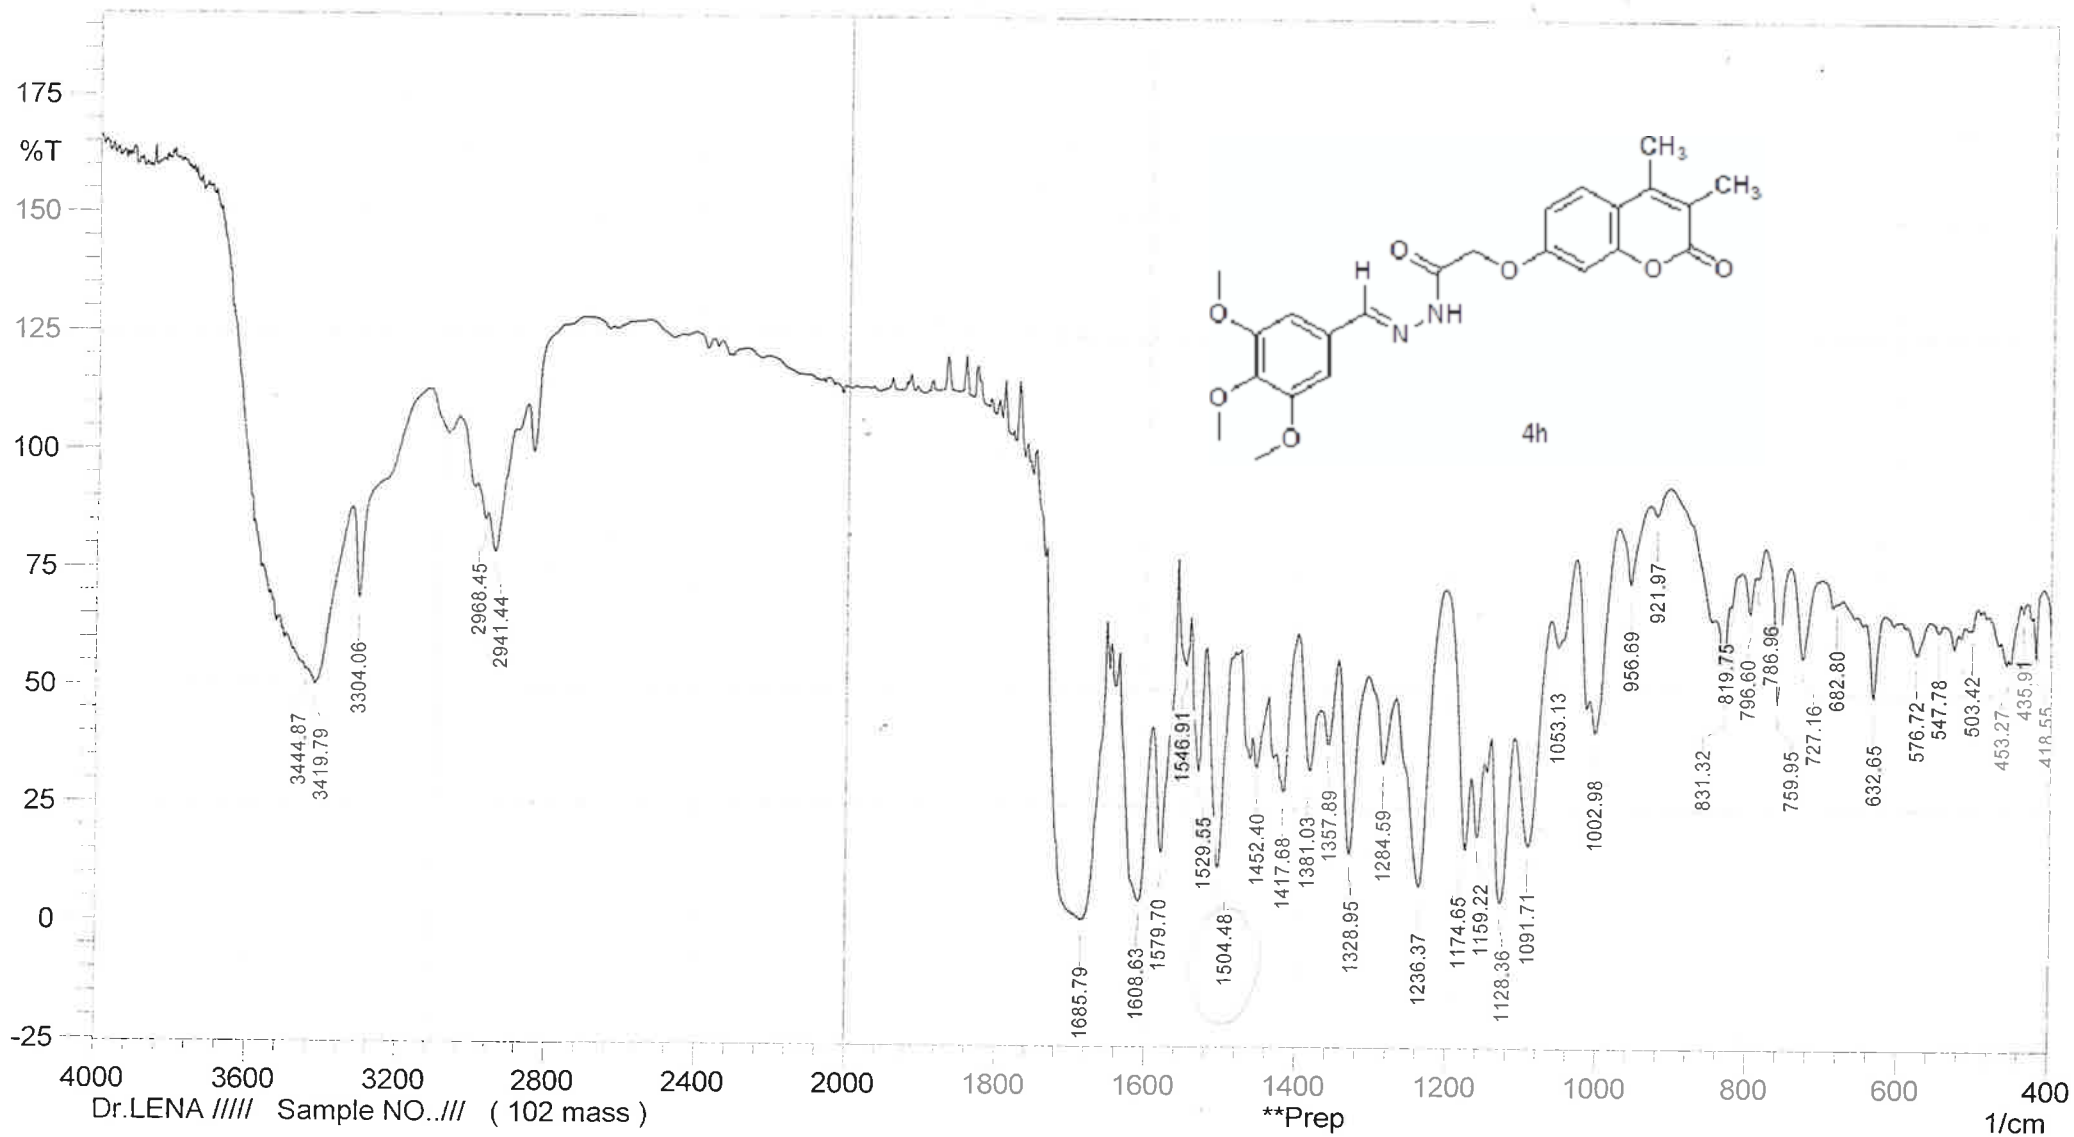

Comment;  
 Dr.LENA //// Sample NO./// ( 102 mass )  
 \*\*Prepared By : Dr.Ahmed A.EL-Wakeel , Ph.D.

Date/Time; 4/30/2010 1:54:28 AM  
 No. of Scans; 10  
 Resolution; 4 [1/cm]  
 Apodization; Happ-Genzel  
 User; Heinrich

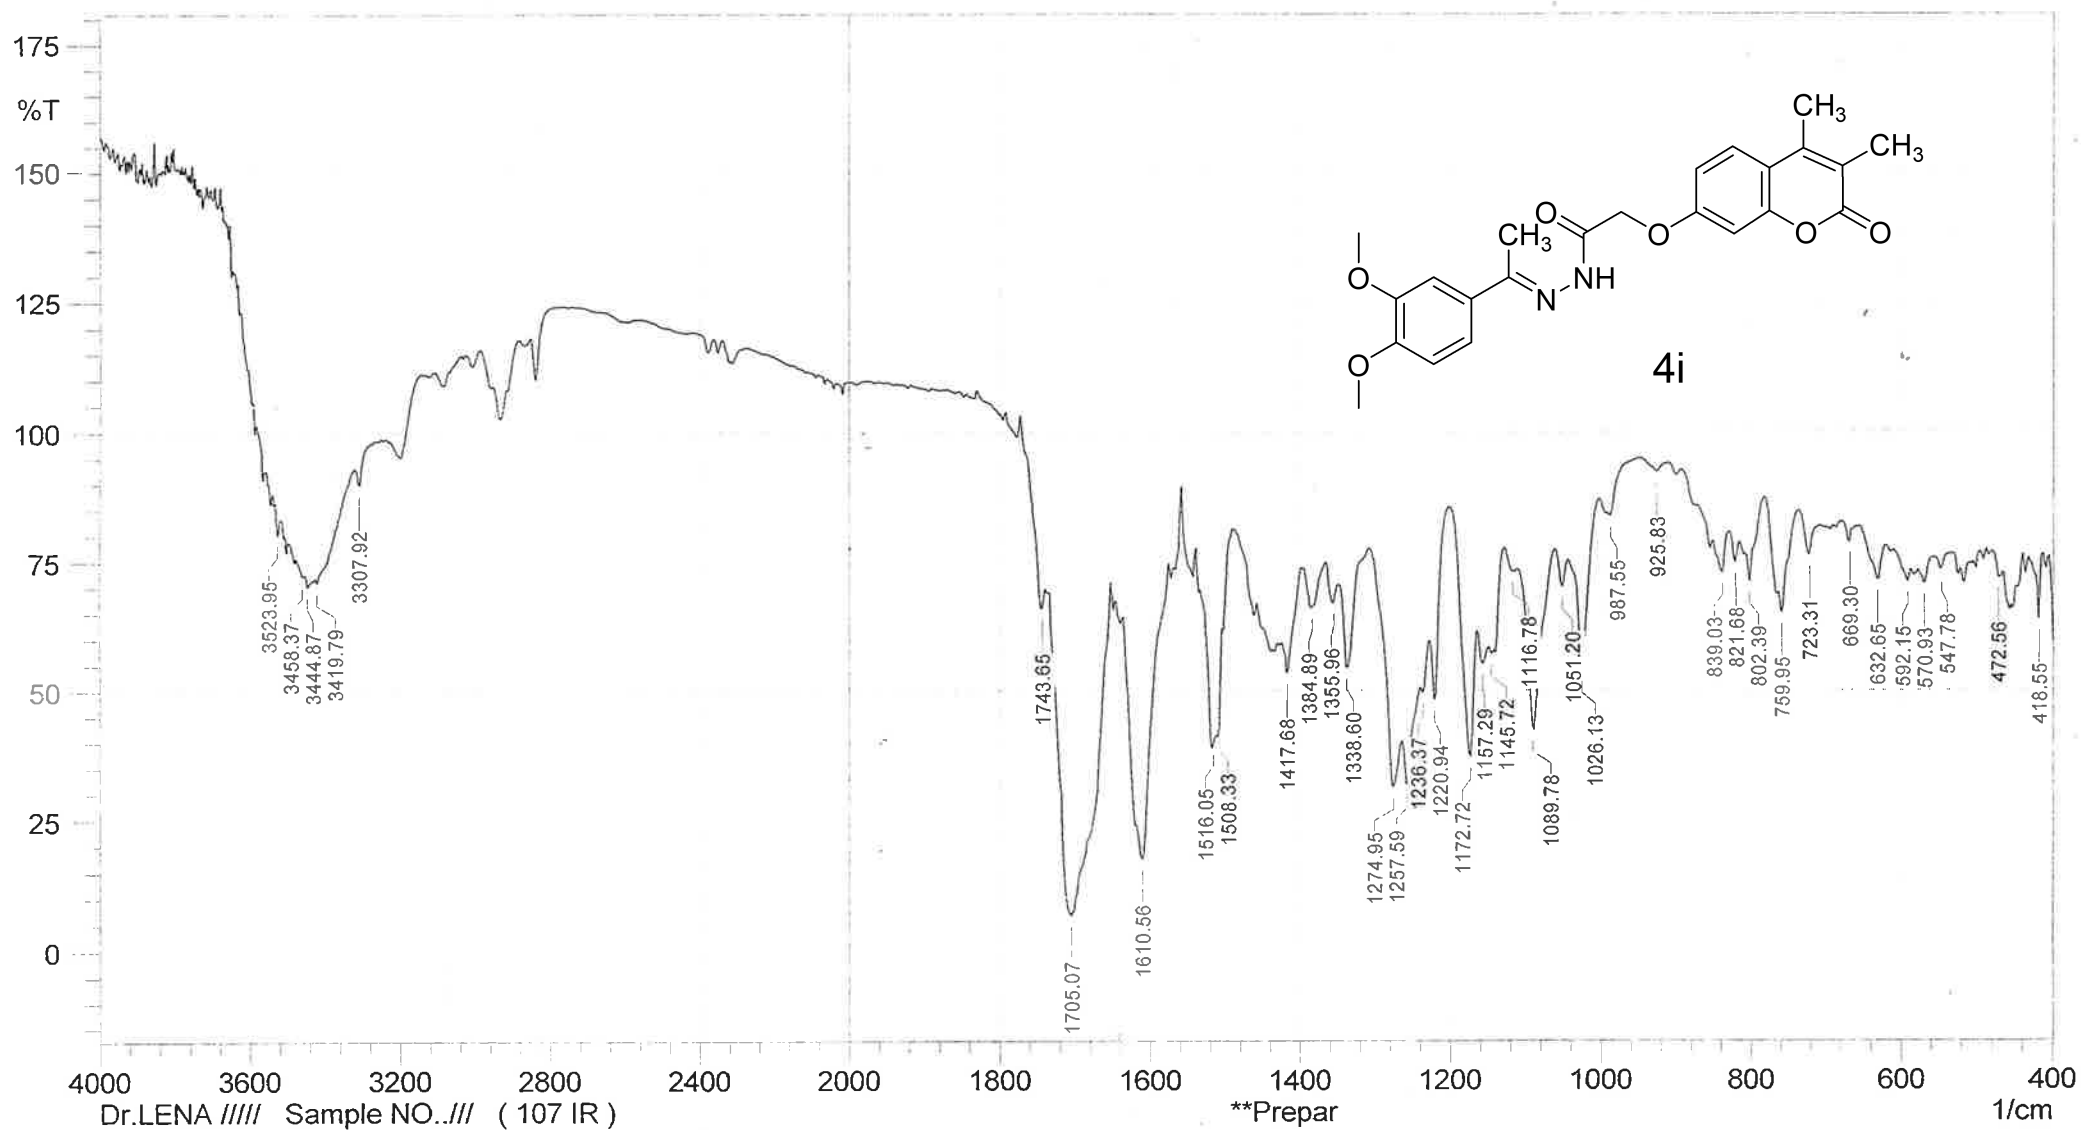

Comment;  
 Dr.LENA //// Sample NO.//// ( 107 IR )  
 \*\*Prepared By : Dr.Ahmed A.EL-Wakeel , Ph.D.

Date/Time; 4/30/2010 4:24:46 AM  
 No. of Scans; 10  
 Resolution; 4 [1/cm]  
 Apodization; Happ-Genzel  
 User; Heinrich

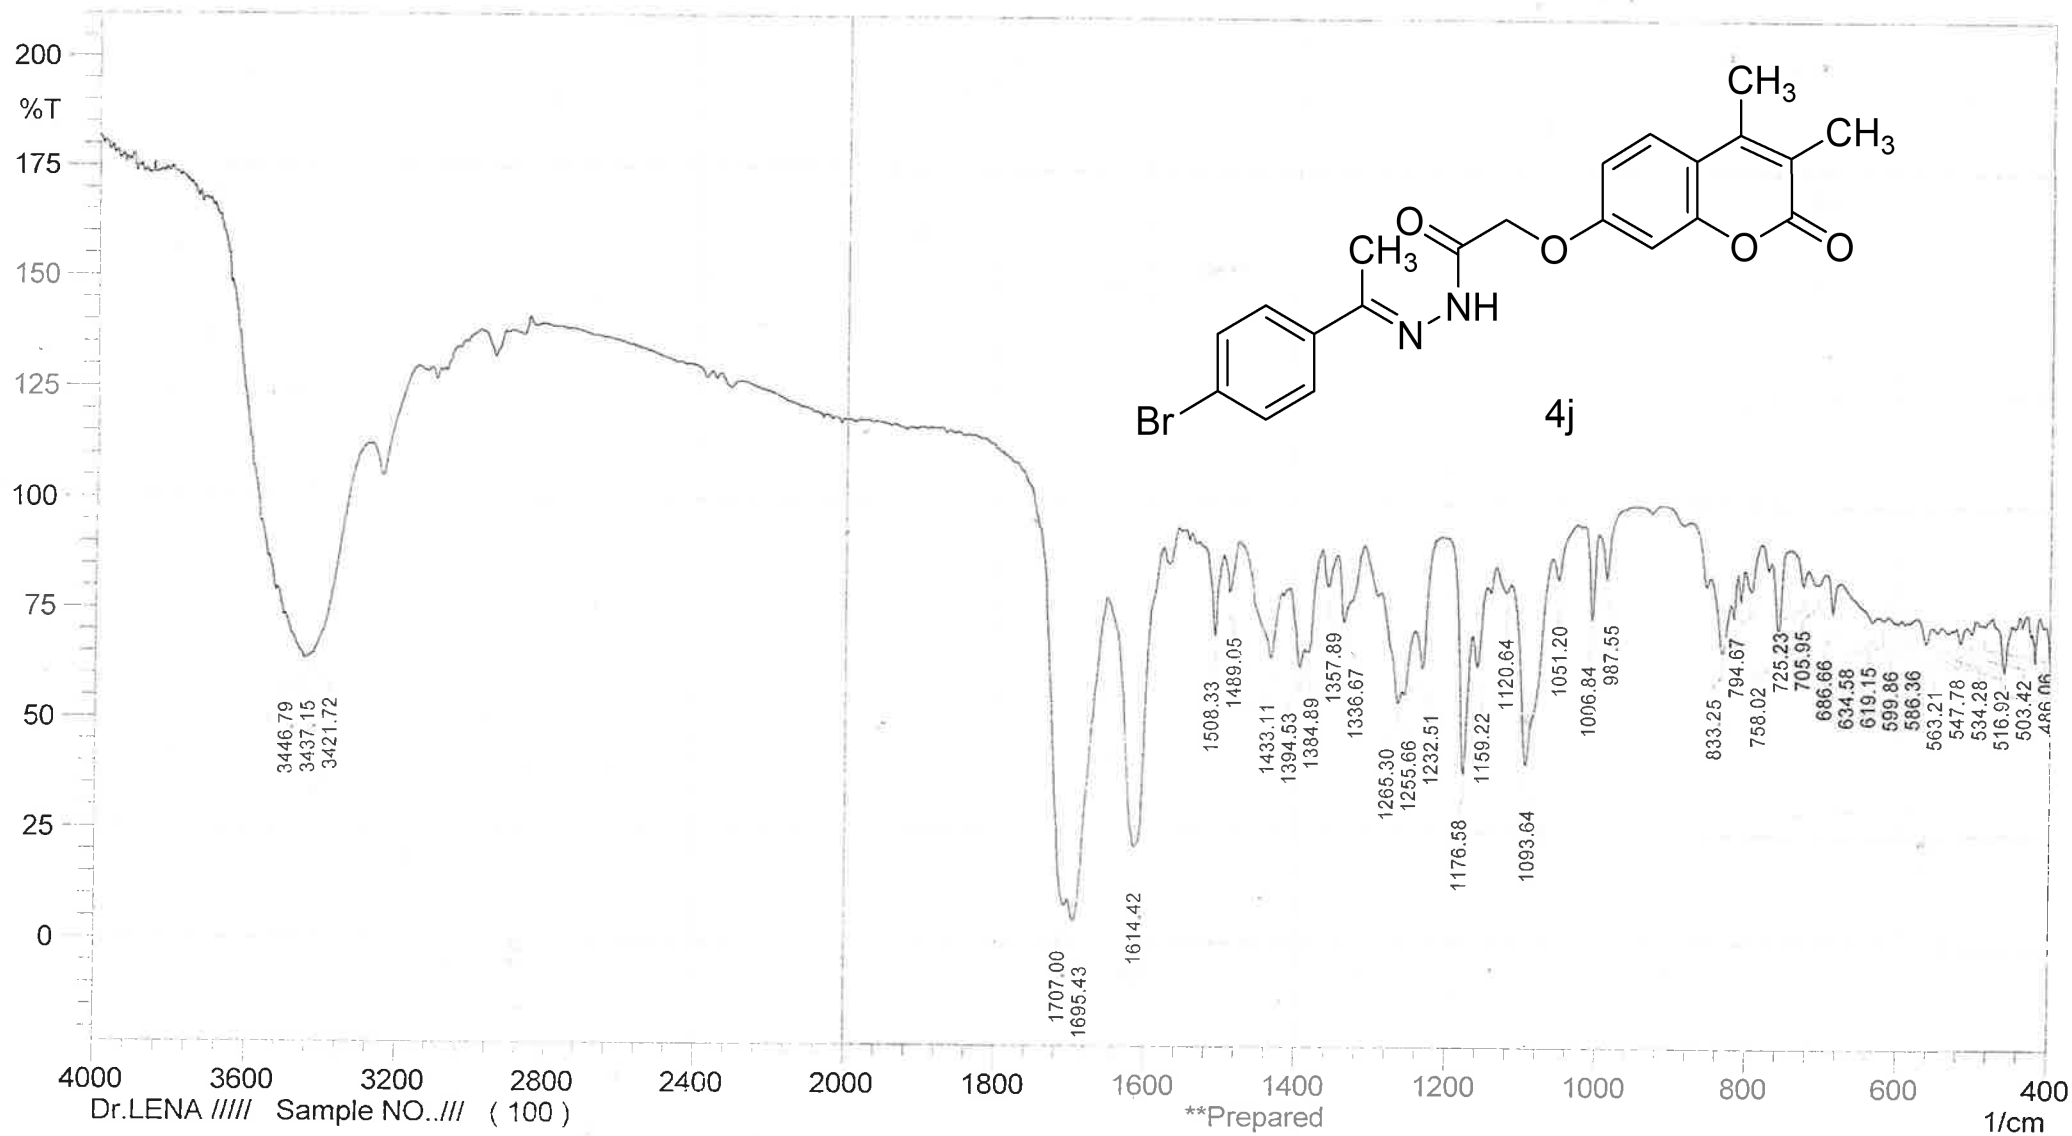

Comment;  
 Dr.LENA // Sample NO. // ( 100 )  
 \*\*Prepared By : Dr.Ahmed A.EL-Wakeel , Ph.D.

Date/Time; 4/30/2010 1:17:56 AM  
 No. of Scans; 10  
 Resolution; 4 [1/cm]  
 Apodization; Happ-Genzel  
 User; Heinrich

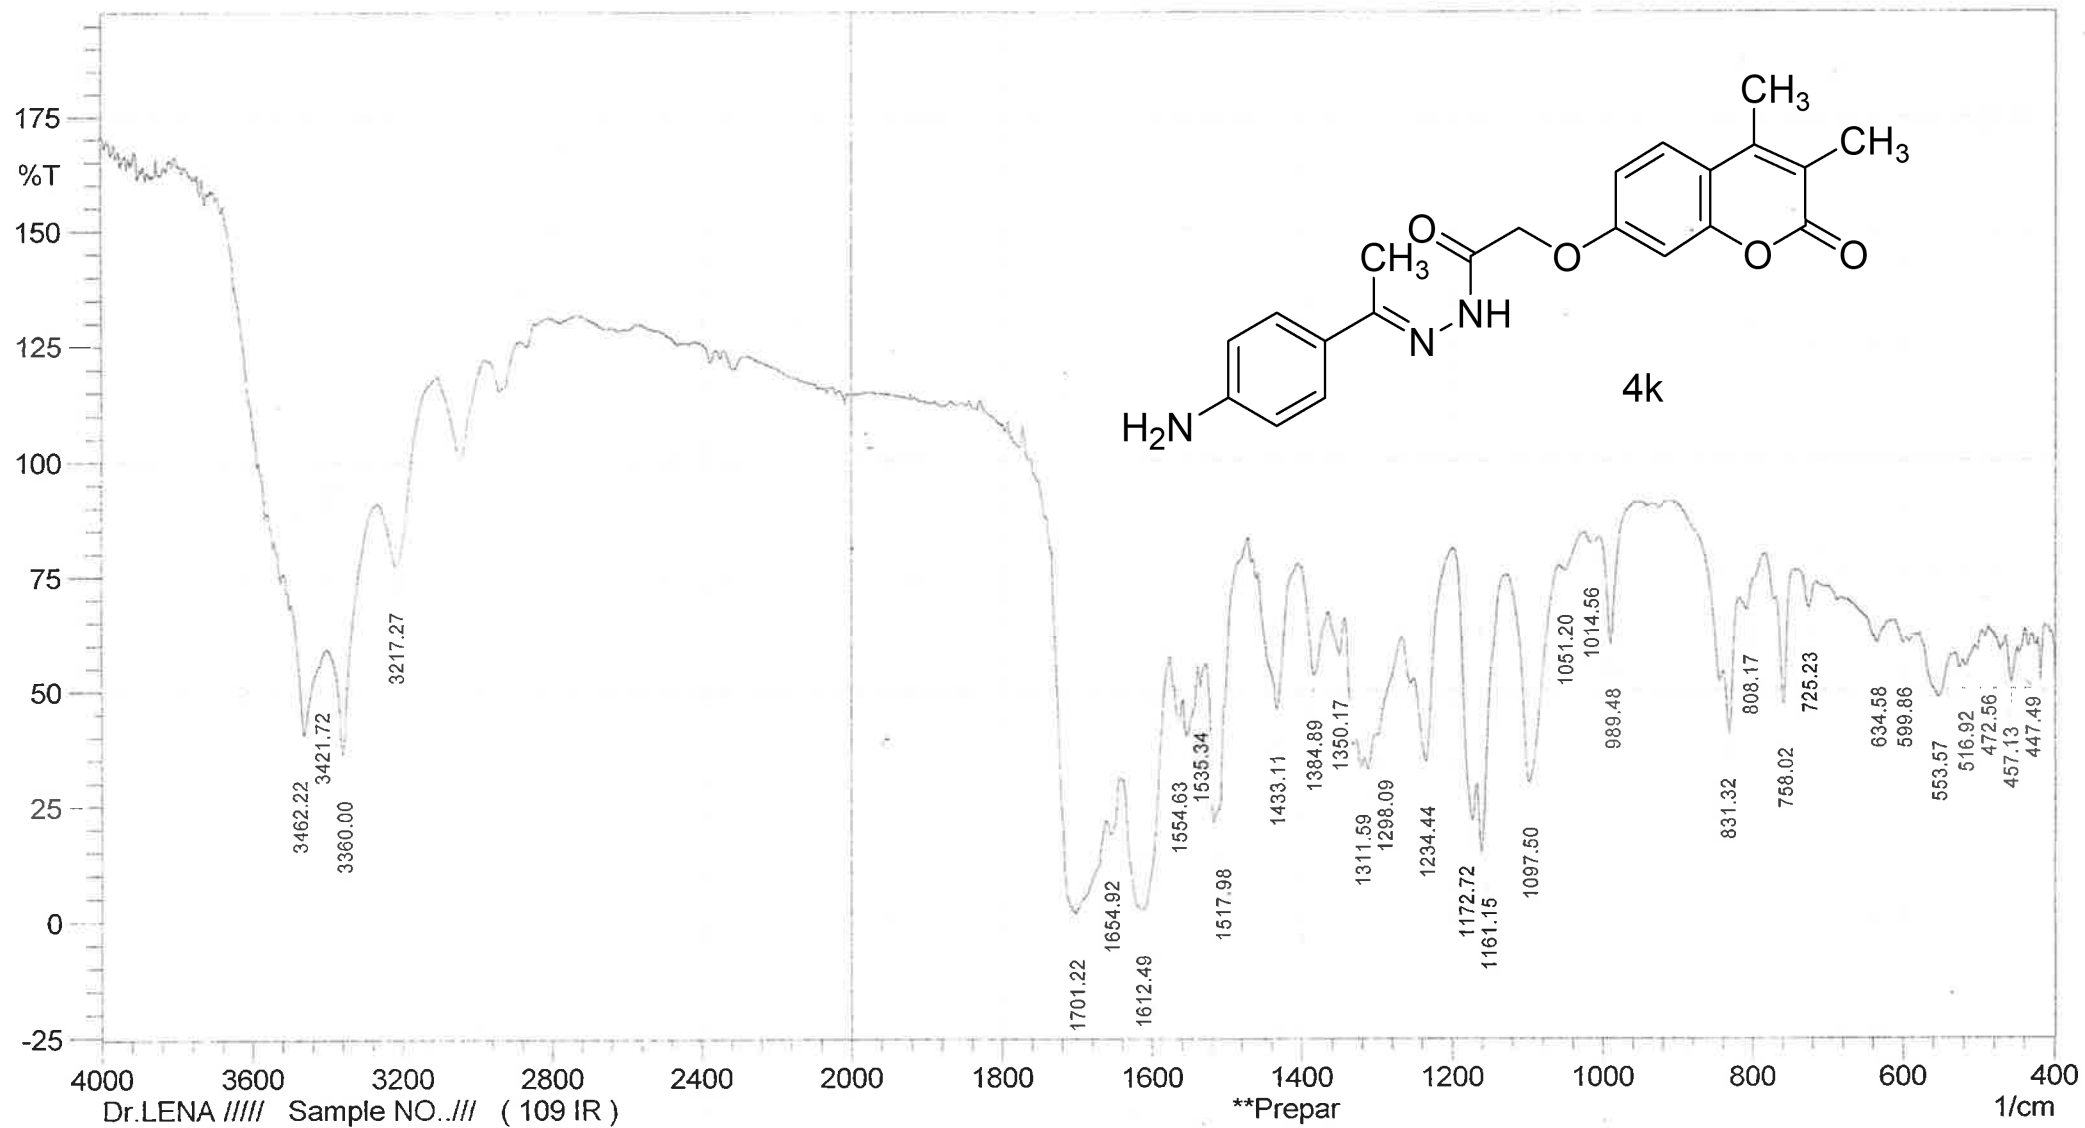

Comment;  
 Dr.LENA // Sample NO. // ( 109 IR )  
 \*\*Prepared By : Dr.Ahmed A.EL-Wakeel , Ph.D.

Date/Time; 4/30/2010 5:06:04 AM  
 No. of Scans; 10  
 Resolution; 4 [1/cm]  
 Apodization; Happ-Genzel  
 User; Heinrich

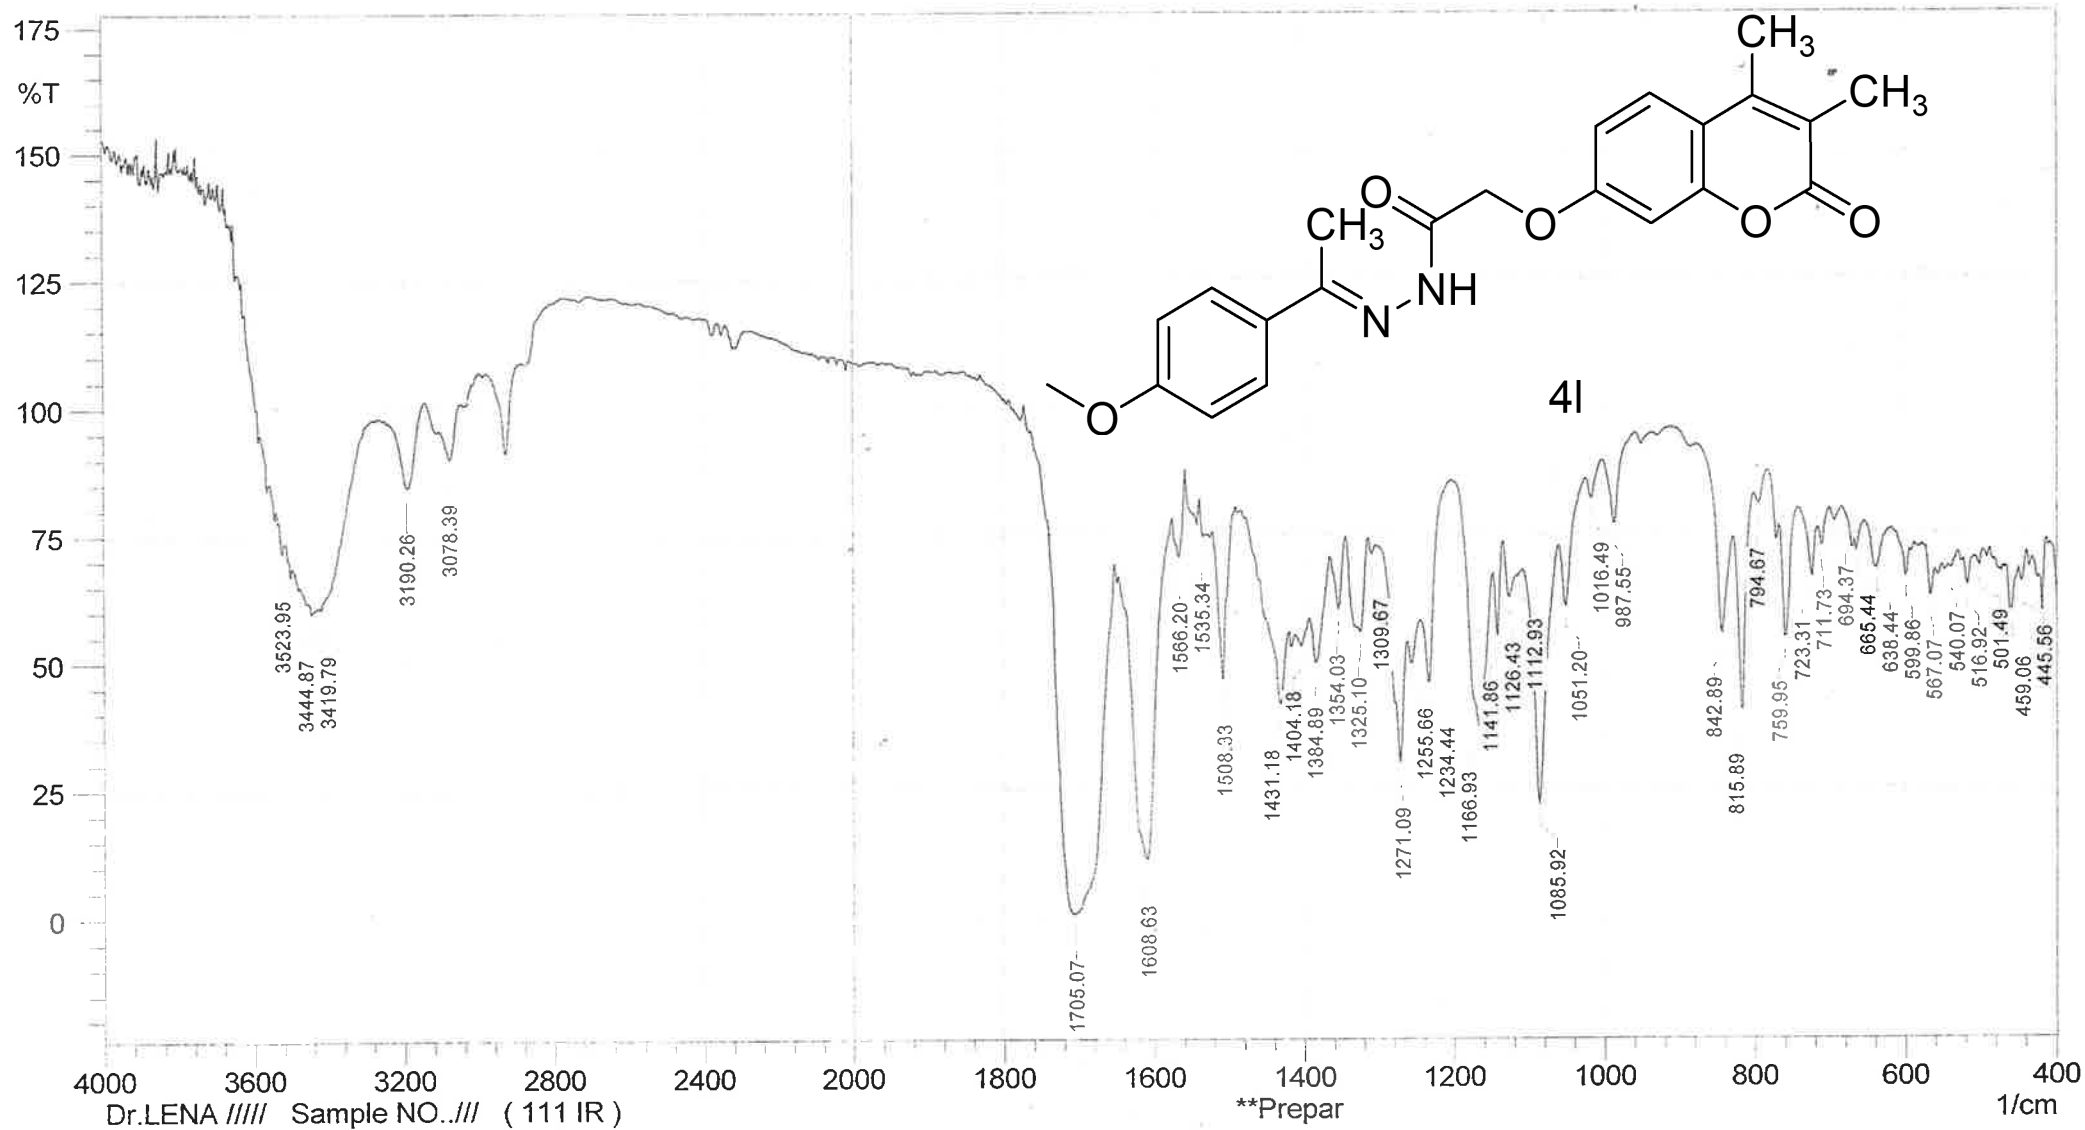

Comment;  
 Dr.LENA //// Sample NO.//// (111 IR)  
 \*\*Prepared By : Dr.Ahmed A.EL-Wakeel , Ph.D.

Date/Time; 4/30/2010 5:33:22 AM  
 No. of Scans; 10  
 Resolution; 4 [1/cm]  
 Apodization; Happ-Genzel  
 User; Heinrich



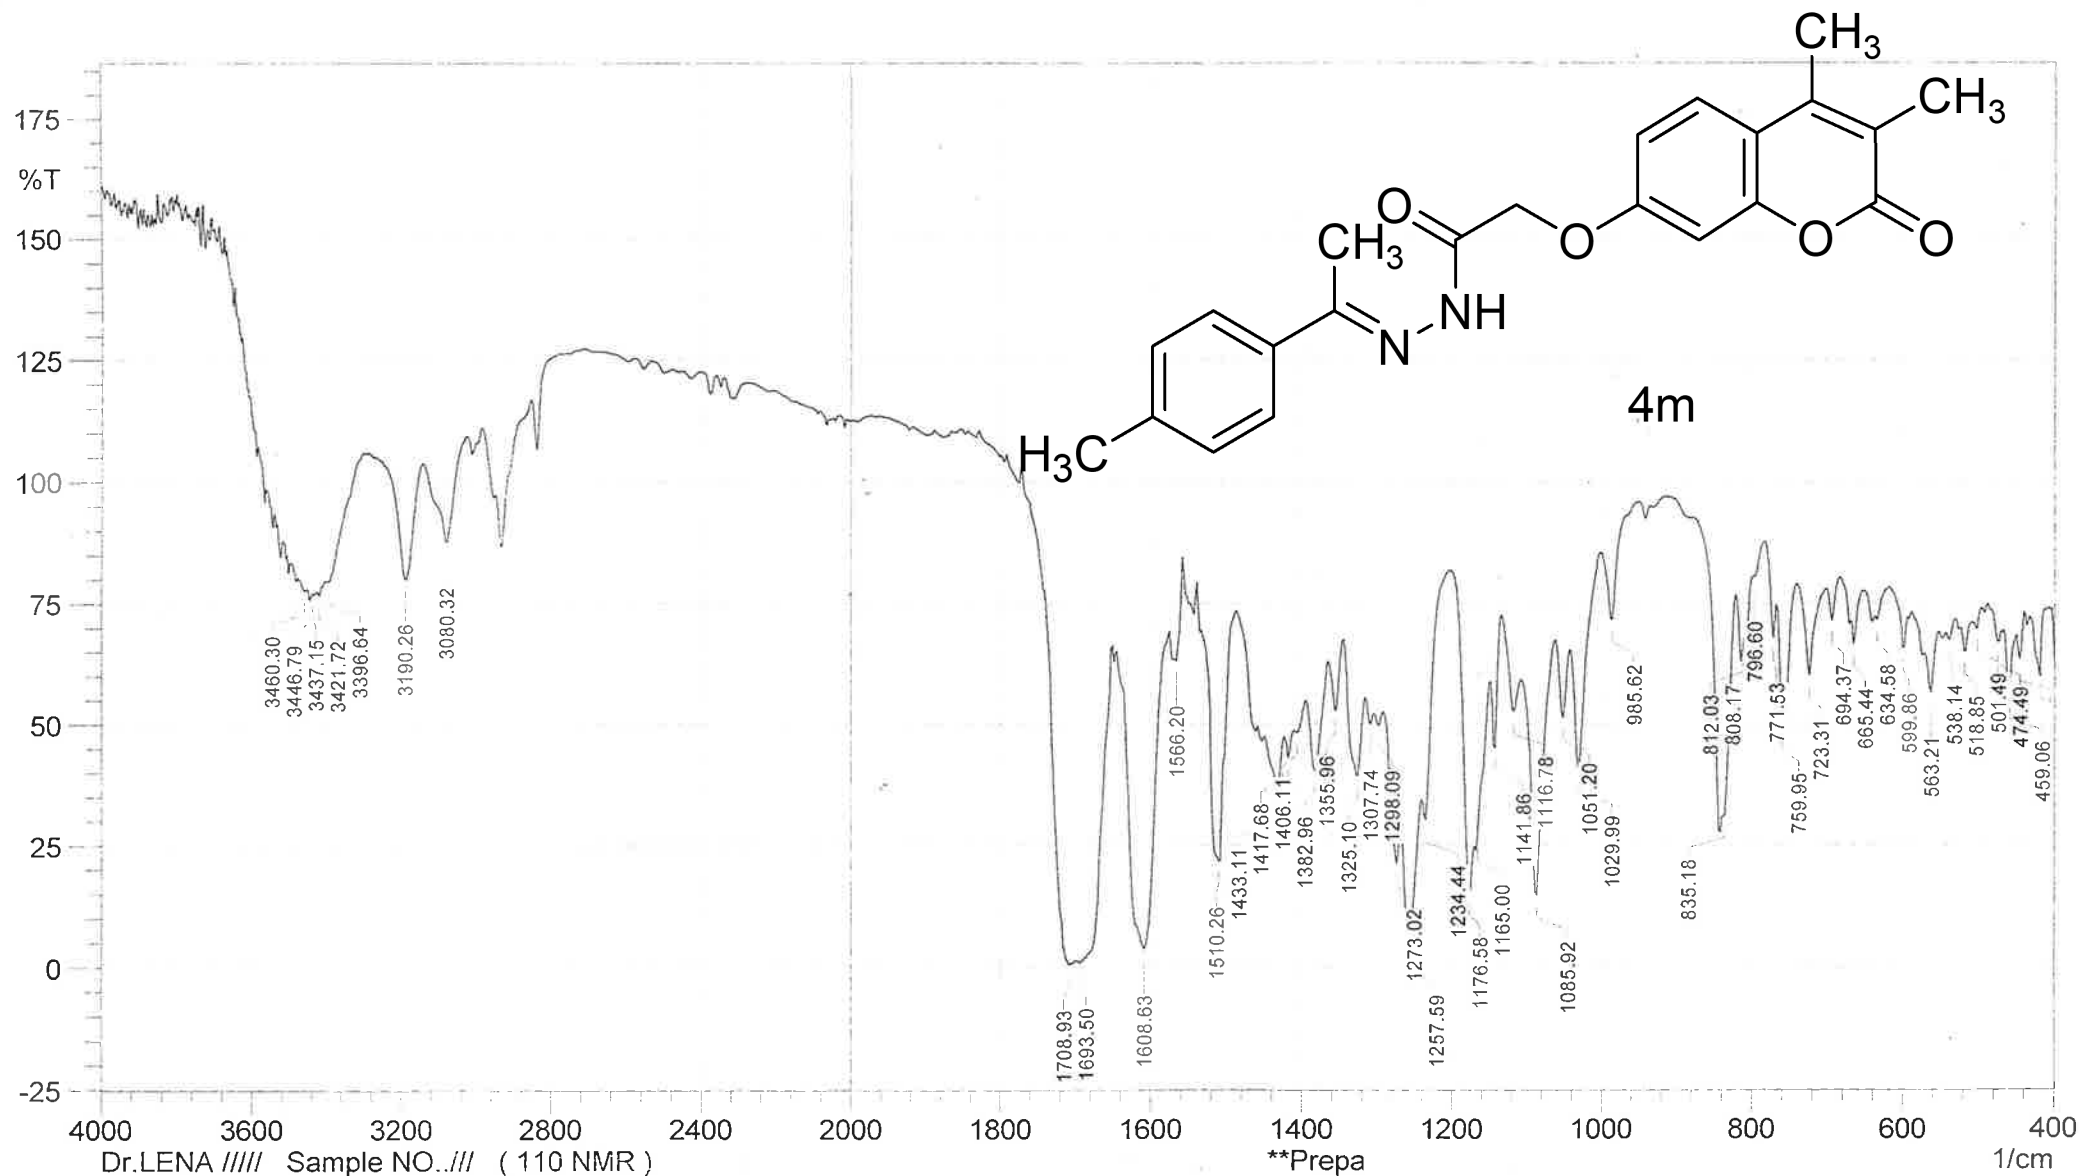

Comment;  
 Dr.LENA //// Sample NO.//// ( 110 NMR )  
 \*\*Prepared By : Dr.Ahmed A.EL-Wakeel , Ph.D.

Date/Time; 4/30/2010 5:20:10 AM  
 No. of Scans; 10  
 Resolution; 4 [1/cm]  
 Apodization; Happ-Genzel  
 User; Heinrich
